# Supplementary material for: Photoredox-mediated Minisci C–H alkylation of N-heteroarenes using boronic acids and hypervalent iodine
Source: PubMed Central journal article supplement (PMC5356021; doi:10.1039/c6sc02653b), 2016-07-12

## Supporting Information

### Photoredox-Mediated Minisci C-H Alkylation of *N*-Heteroarenes Using Boronic Acids and Hypervalent Iodine

Guo-Xing Li,<sup>a</sup> Cristian A Morales-Rivera,<sup>b</sup> Yaxin Wang,<sup>a</sup> Fang Gao,<sup>a</sup> Gang He,<sup>a</sup>  
Peng Liu,<sup>\*b</sup> and Gong Chen<sup>\*a,c</sup>

<sup>a</sup>State Key Laboratory and Institute of Elemento-Organic Chemistry,  
Collaborative Innovation Center of Chemical Science and Engineering (Tianjin),  
Nankai University, Tianjin 30071, China

<sup>b</sup>Department of Chemistry, University of Pittsburgh, Pittsburgh, Pennsylvania 15260, USA

<sup>c</sup>Department of Chemistry, The Pennsylvania State University, University Park, Pennsylvania  
16802, USA

#### Content

1. Reagents, S2
2. Instruments, S2
3. Synthesis of *N*-heteroaromatic substrates, S3
4. Synthesis of alkyl boronic acids, S5
5. Reaction optimization for Minisci C-H alkylation of compound 1, S11
6. General procedures and substrate scope for Minisci C-H alkylation, S12
7. Mechanism study, S32
8. DFT calculations, S34
9. References, S49
10. <sup>1</sup>H-NMR and <sup>13</sup>C-NMR spectra, S51

## 1. Reagents

All commercial materials were used as received unless otherwise noted. DCM was dried by distillation over  $\text{CaH}_2$ . Anhydrous  $\text{CH}_3\text{CN}$  was purchased from Acros Organics and stored under nitrogen atmosphere. TLC were performed on silica gel Huanghai HSGF254 plates and visualization of the developed chromatogram was performed by fluorescence quenching ( $\lambda_{\text{max}} = 254 \text{ nm}$ ). Flash chromatography was performed using Silica gel (200-300 mesh) purchased from Qingdao Haiyang Chemical Co., China. Hydroxylbenziodoxole (BI-OH),<sup>1</sup> acetoxybenziodoxole (BI-OAc),<sup>1</sup> azidobenziodoxole (BI-N<sub>3</sub>)<sup>1</sup>, methoxylbenziodoxole (BI-OMe),<sup>2</sup> chlorobenziodoxole (BI-Cl)<sup>3</sup> were synthesized according to reported procedures and used as freshly prepared.  $\text{Ru}(\text{bpy})_3\text{Cl}_2$  (98%,  $\text{Ru} > 15.75\%$ , Energy Chemical) and HFIP (99.0%, J&K Chemical) were used as received.

## 2. Instruments

NMR spectra were recorded on Bruker AVANCE AV 400 instruments and all NMR experiments were reported in units, parts per million (ppm). Peaks recorded are relative to internal standards: TMS ( $\delta = 0.00$ ) for  $^1\text{H}$  and  $\text{CDCl}_3$  ( $\delta = 77.00$ ) for  $^{13}\text{C}$  spectra. Multiplicities are recorded as: s = singlet, d = doublet, t = triplet, dd = doublet of doublets, br s = broad singlet, m = multiplet. High resolution ESI mass experiments were operated on a Waters LCT Premier instrument. All reactions were carried out in a 4 mL glass vial (Thermo SCIENTIFIC National B7999-2, made from superior quality 33 expansion borosilicate clear glass), sealed with PTEF cap on bench top.

### 3. Synthesis of *N*-heteroaromatic substrates

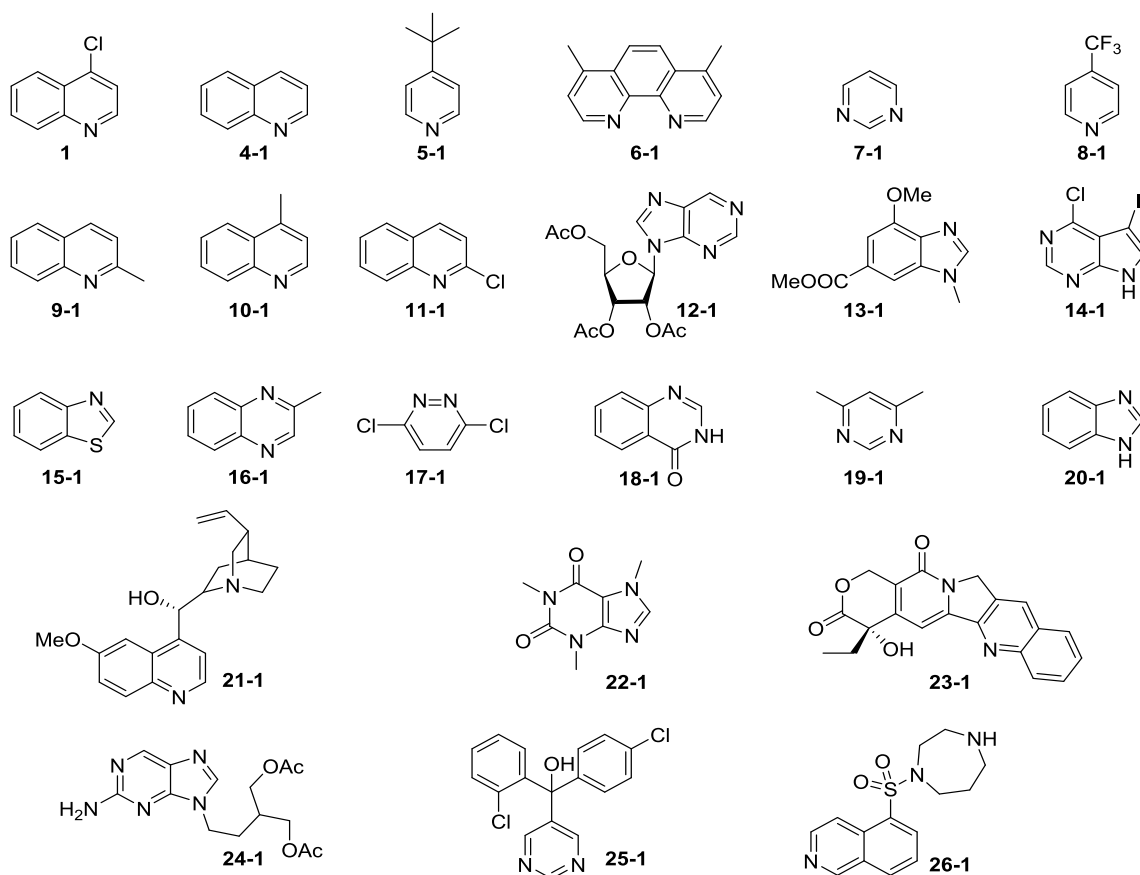

**Scheme S1.** List of all *N*-heteroaromatic substrates used in this study

Compounds **1**, **4-1**, **5-1**, **6-1**, **7-1**, **8-1**, **9-1**, **10-1**, **11-1**, **14-1**, **15-1**, **16-1**, **17-1**, **18-1**, **19-1**, **20-1**, **21-1**, **22-1**, **23-1**, **24-1**, **25-1**, **26-1** were commercial available and used as received.

#### 3.1 Synthesis of **12-1**

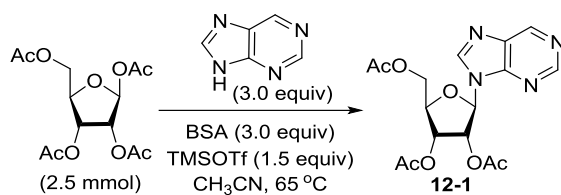

**Scheme S2.**

Compound **12-1** was prepared following a reported procedure<sup>4</sup>: 1,2,3,5-*O*-Tetracetyl- $\beta$ -L-ribofuranose (800 mg, 2.5 mmol, 1.0 equiv) and purine (900 mg, 7.5 mmol, 3.0 equiv) were co-evaporated three times with anhydrous CH<sub>3</sub>CN under argon. Then anhydrous CH<sub>3</sub>CN (50 mL) and BSA (*N,O*-bis(trimethylsilyl)acetamide, 1.85 mL, 7.5 mmol, 3.0 equiv) were added

at room temperature. The mixture was stirred at 60-65 °C until all the base was dissolved. TMSOTf (435 μL, 3.75 mmol, 1.5 equiv) was added, and the resulting mixture was stirred overnight at 65 °C. After cooled to room temperature, the mixture was diluted with DCM (250 mL), washed with saturated aqueous NaHCO<sub>3</sub> solution (20 mL), dried over Na<sub>2</sub>SO<sub>4</sub> and filtrated. The filtrate was concentrated *in vacuo* and the residue was purified by flash chromatography on silica gel (ethyl acetate/petroleum ether = 4:1) to afford **12-1** (473 mg, 50%) as a colorless oil. Spectra data are consistent with those reported in the literature.<sup>4</sup>

### 3.2 Synthesis of 13-1

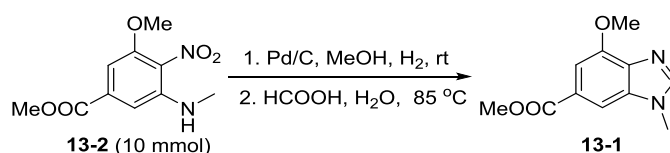

**Scheme S3.**

To a solution of compound **13-2** (2.41 g, 10 mmol, 1.0 equiv) in anhydrous methanol (100 mL) was added 5% Pd/C (2.12 g). The mixture was stirred at room temperature under an atmosphere of H<sub>2</sub> (balloon) for 20 h then filtrated through a pad of Celite and washed with 20 mL of methanol. The filtrate was concentrated *in vacuo* and the residue was dissolved in a mixture of water (20 mL) and formic acid (20 mL). The solution was then heated at 85 °C for 12 h. After cooled to room temperature, the solvent was removed under reduced pressure. The residue was partitioned between EtOAc (150 mL) and saturated aqueous NaHCO<sub>3</sub> solution (50 mL). The organic layer was washed with brine, dried over Na<sub>2</sub>SO<sub>4</sub> and filtrated. The filtrate was concentrated *in vacuo* and the resulting residue was purified by flash chromatography on silica gel (ethyl acetate/petroleum ether = 4:1) to afford compound **13-1** (1.40 g, 63% for 2 steps) as a white solid. <sup>1</sup>H NMR (400 MHz, CDCl<sub>3</sub>) δ 8.13 (s, 1H), 7.79 (s, 1H), 7.39 (s, 1H), 4.06 (s, 3H), 3.99 (s, 3H), 3.94 (s, 3H); <sup>13</sup>C NMR (101 MHz, CDCl<sub>3</sub>) δ 167.62, 147.08, 145.20, 145.12, 127.56, 124.77, 116.08, 104.24, 55.74, 52.11, 33.93; HRMS Calcd for C<sub>11</sub>H<sub>13</sub>N<sub>2</sub>O<sub>3</sub> [M+H<sup>+</sup>]: 221.0926, Found: 221.0925.

## 4. Synthesis of alkyl boronic acids

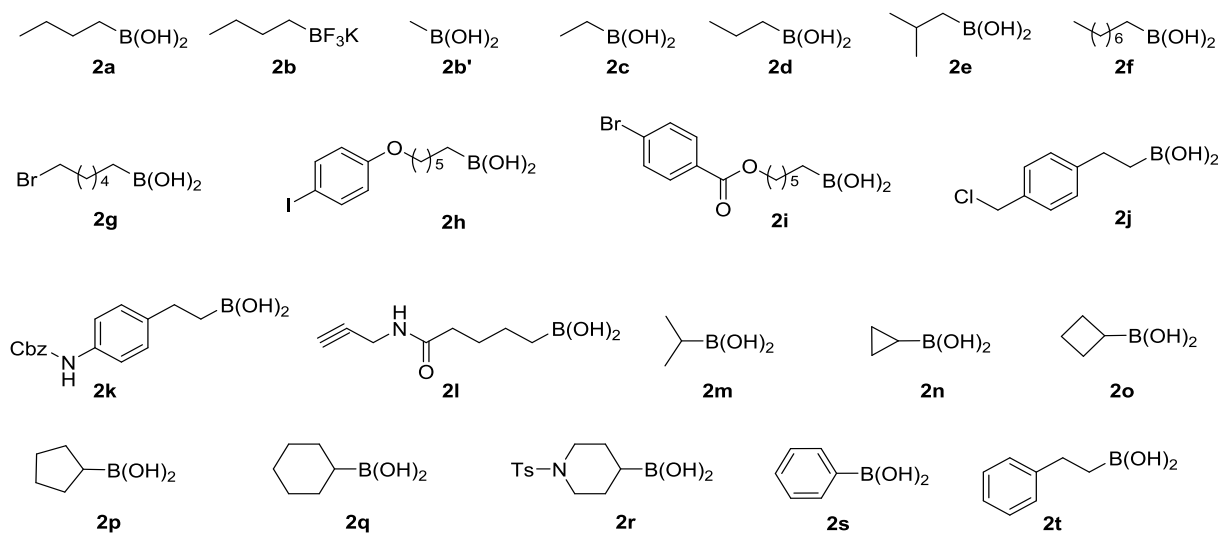

**Scheme S4.** List of all alkyl boronic acids used in this study

Compounds **2a**, **2b**, **2b'**, **2c**, **2d**, **2e**, **2f**, **2m**, **2n**, **2o**, **2p**, **2q**, **2s**, and **2t** were commercial available and used as received.

### 4.1 Synthesis of alkene substrates **2h-1**, **2i-1** and **2k-1**

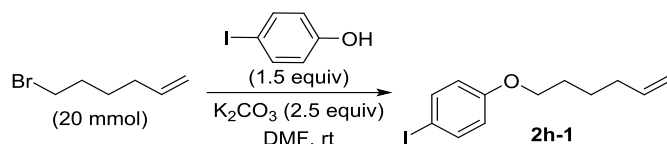

**Scheme S5.**

To a solution of 6-bromohex-1-ene (3.24 g, 20 mmol, 1.0 equiv) in DMF (30 mL) was added 4-iodophenol (6.60 g, 30 mmol, 1.5 equiv) and  $K_2CO_3$  (7.46 g, 50 mmol, 2.5 equiv). The mixture was stirred at room temperature until 6-bromohex-1-ene was completely consumed monitoring by TLC. The reaction mixture was poured into brine (200 mL) and extracted with  $Et_2O$  (40 mL x 3). The combined organic phase was dried over  $Na_2SO_4$  and filtrated. The filtrate was concentrated *in vacuo* and the residue was purified by flash chromatography on silica gel (ethyl acetate/petroleum ether = 5:95) to afford compound **2h-1** (5.22 g, 86%) as a colorless oil. Spectra data are consistent with those reported in the literature.<sup>5</sup>

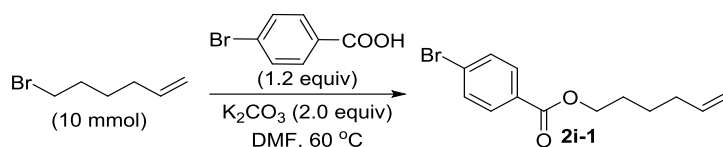

**Scheme S6.**

To a solution of 6-bromohex-1-ene (3.24 g, 20 mmol, 1.0 equiv) in DMF (30 mL) was added 4-bromobenzoic acid (4.84 g, 24 mmol, 1.2 equiv) and  $K_2CO_3$  (5.53 g, 40 mmol, 2.0 equiv) at room temperature. Then the mixture was stirred at 60 °C until 6-bromohex-1-ene was completely consumed monitoring by TLC. After cooled to room temperature, the reaction mixture was poured into brine (200 mL) and extracted with  $Et_2O$  (40 mL x 3). The combined organic phase was dried over  $Na_2SO_4$  and filtrated. The filtrate was concentrated *in vacuo* and the residue was purified by flash chromatography on silica gel (ethyl acetate/petroleum ether = 5:95) to afford compound **2h-1** (3.80 g, 67%) as a colorless oil. Spectra data are consistent with those reported in the literature.<sup>6</sup>

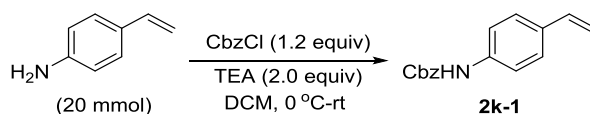

**Scheme S7.**

To a solution of 4-vinylaniline (2.39 g, 20 mmol, 1.0 equiv) and TEA (4.07g, 40 mmol, 2.0 equiv) in DCM (50 mL) was slowly added CbzCl (4.10 g, 24 mmol, 1.2 equiv) at 0 °C. After addition completed, the mixture was stirred at room temperature until 4-vinylaniline was completely consumed monitoring by TLC. The reaction mixture was diluted with DCM (100 mL), and washed with 1 N HCl (20 mL), water (20 mL) and brine (20 mL) successively. The organic layer was dried over  $Na_2SO_4$  and filtrated. The filtrate was concentrated *in vacuo* and the residue was purified by flash chromatography on silica gel (ethyl acetate/petroleum ether = 5:95) to afford compound **2k-1** (4.10 g, 81%) as a colorless solid. Spectra data are consistent with those reported in the literature.<sup>7</sup>

## 4.2 General Procedure for Synthesis of alkyl boronic acids 2g-2k

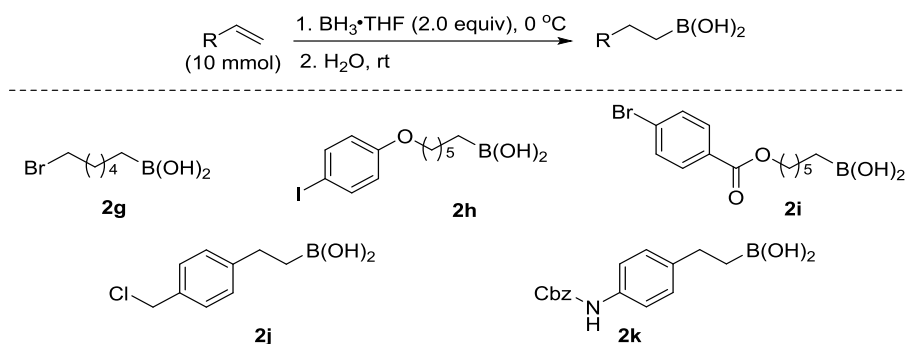

**Scheme S8.**

The alkyl boronic acid substrates were prepared following a reported procedure<sup>8</sup>: to a solution of alkene (10 mmol, 1.0 equiv) in THF (2 mL) was added a solution of  $\text{BH}_3 \cdot \text{THF}$  (20 mL, 20 mmol, 2.0 equiv, 1.0 M solution in THF) dropwise at 0 °C. The mixture was stirred for 2 h at room temperature and  $\text{H}_2\text{O}$  (2 mL) was added carefully. After stirred for additional 3 h at room temperature, the reaction mixture was concentrated *in vacuo*. The residue was dissolved in EtOAc (30 mL), washed with saturated aqueous  $\text{NaHCO}_3$  solution (20 mL) and brine (20 mL). The organic layer was dried over  $\text{Na}_2\text{SO}_4$  and filtrated. The filtrate was concentrated *in vacuo* to approximately 5 mL. Petroleum ether was then added under stirring. The resultant precipitate was collected by filtration, washed with petroleum ether and dried under high vacuum to afford the desired alkyl boronic acid as a white solid.

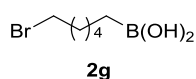

Compound **2g** was prepared in 42% yield following the general procedure.  $^1\text{H NMR}$  ( $\text{DMSO-}d_6$ , 400 MHz)  $\delta$  7.37 (s, 2H), 3.52 (t,  $J = 6.7$  Hz, 2H), 1.82-1.75 (m, 2H), 1.40-1.21 (m, 6H), 0.58 (t,  $J = 7.6$  Hz, 2H);  $^{13}\text{C NMR}$  ( $\text{DMSO-}d_6$ , 100 MHz)  $\delta$  35.75, 32.72, 31.61, 27.92, 24.51, 15.80; **HRMS** Calcd for  $\text{C}_6\text{H}_{14}\text{BBrNaO}_2$  [ $\text{M}+\text{Na}^+$ ]: 231.0168, Found: 231.0134.

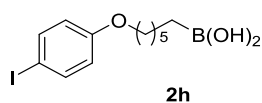

Compound **2h** was prepared in 45% yield following the general procedure.  $^1\text{H NMR}$  ( $\text{DMSO-}d_6$ , 400 MHz)  $\delta$  7.60 (d,  $J = 8.4$  Hz, 2H), 7.40 (s, 2H), 6.81 (d,  $J = 8.4$  Hz, 2H), 3.95 (t,  $J = 6.3$

Hz, 2H), 1.74-1.67 (m, 2H), 1.40-1.31 (m, 6H), 0.61 (t,  $J = 7.3$  Hz, 2H);  $^{13}\text{C}$  NMR (DMSO- $d_6$ , 100 MHz)  $\delta$  159.03, 138.37, 117.67, 83.25, 68.07, 32.29, 29.02, 25.86, 24.64, 15.88; **HRMS** Calcd for  $\text{C}_{12}\text{H}_{18}\text{BINO}_3$  [ $\text{M}+\text{Na}^+$ ]: 371.0291, Found: 371.0273.

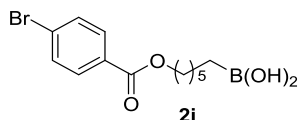

Compound **2i** was prepared in 31% yield following the general procedure.  $^1\text{H}$  NMR (DMSO- $d_6$ , 400 MHz)  $\delta$  7.88 (d,  $J = 8.5$  Hz, 2H), 7.74 (d,  $J = 8.5$  Hz, 2H), 7.39 (s, 2H), 4.25 (t,  $J = 6.5$  Hz, 2H), 1.72-1.65 (m, 2H), 1.41-1.23 (m, 6H), 0.58 (t,  $J = 7.4$  Hz, 2H);  $^{13}\text{C}$  NMR (DMSO- $d_6$ , 100 MHz)  $\delta$  165.56, 132.38, 131.53, 129.51, 127.77, 65.51, 32.17, 28.56, 25.85, 24.57, 15.84; **HRMS** Calcd for  $\text{C}_{13}\text{H}_{18}\text{BBrNaO}_4$  [ $\text{M}+\text{Na}^+$ ]: 351.0379, Found: 351.0394.

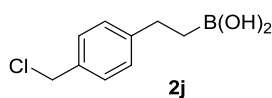

Compound **2j** was prepared in 46% yield following the general procedure.  $^1\text{H}$  NMR (DMSO- $d_6$ , 400 MHz)  $\delta$  7.53 (s, 2H), 7.31 (d,  $J = 8.0$  Hz, 2H), 7.18 (d,  $J = 8.0$  Hz, 2H), 4.71 (s, 2H), 2.63 (t,  $J = 8.2$  Hz, 2H), 0.90 (t,  $J = 8.2$  Hz, 2H);  $^{13}\text{C}$  NMR (DMSO- $d_6$ , 100 MHz)  $\delta$  145.90, 134.98, 129.26, 128.47, 46.79, 30.38, 17.84; **HRMS** Calcd for  $\text{C}_9\text{H}_{12}\text{BClNaO}_2$  [ $\text{M}+\text{Na}^+$ ]: 221.0517, Found: 221.0509.

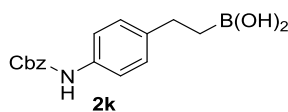

Compound **2k** was prepared in 31% yield following the general procedure.  $^1\text{H}$  NMR (DMSO- $d_6$ , 400 MHz)  $\delta$  9.64 (s, 1H), 7.51 (s, 2H), 7.42-7.33 (m, 7H), 7.09 (d,  $J = 8.3$  Hz, 2H), 5.14 (s, 2H), 2.57 (t,  $J = 8.1$  Hz, 2H), 0.88 (t,  $J = 8.1$  Hz, 2H);  $^{13}\text{C}$  NMR (DMSO- $d_6$ , 100 MHz)  $\delta$  153.56, 139.34, 136.88, 136.51, 128.58, 128.21, 128.14, 128.08, 118.36, 65.73, 29.65, 17.76; **HRMS** Calcd for  $\text{C}_{16}\text{H}_{18}\text{BNNaO}_4$  [ $\text{M}+\text{Na}^+$ ]: 322.1227, Found: 322.1242.

### 4.3 Synthesis of alkyl boronic acid **2l**



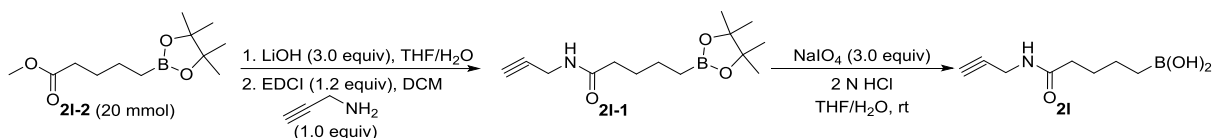

**Scheme S9**

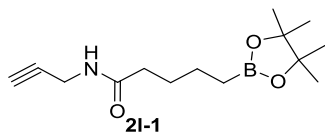

To a solution of compound **21-2** (4.84 g, 20 mmol, 1.0 equiv) in a mixture of THF (40 mL) and H<sub>2</sub>O (20 mL) was added LiOH (0.96 g, 60 mmol, 3.0 equiv). The mixture was stirred at room temperature until compound **21-2** was completely consumed monitoring by TLC. The solvent was concentrated *in vacuo*, then ethyl acetate (50 mL) and water (10 mL) were added. Under vigorous stirring, the reaction was acidified with 2N HCl to pH 1-2. The organic phase was separated, and the aqueous phase was extracted with ethyl acetate (20 mL x 2). The combined organic phase was dried over Na<sub>2</sub>SO<sub>4</sub> and filtrated. The filtrate was concentrated *in vacuo* and the residue was dissolved in DCM (50 mL). To this solution were added EDCI (2.18 g, 24 mmol, 1.2 equiv) and prop-2-yn-1-amine (1.1 g, 20 mmol, 1.0 equiv), and the mixture was stirred at room temperature for 1 h. Then the reaction mixture was diluted with DCM (150 mL), washed with water (20 mL), 1 N HCl (20 mL) and brine (20 mL) successively. The organic layer was dried over Na<sub>2</sub>SO<sub>4</sub> and filtrated. The filtrate was concentrated *in vacuo* and the residue was purified by flash chromatography on silica gel (ethyl acetate/petroleum ether = 1:1) to afford compound **21-1** (3.0 g, 56% for 2 steps) as a colorless oil. <sup>1</sup>H NMR (400 MHz, CDCl<sub>3</sub>) δ 5.85 (s, 1H), 4.06-4.05 (m, 2H), 2.23 (t, *J* = 2.6 Hz, 1H), 2.20 (d, *J* = 7.7 Hz, 1H), 1.66-1.61 (m, 2H), 1.49-1.41 (m, 2H), 1.25 (s, 12H), 0.81 (t, *J* = 7.7 Hz, 2H); <sup>13</sup>C NMR (100 MHz, CDCl<sub>3</sub>) δ 172.66, 83.03, 79.72, 71.45, 36.15, 29.05, 27.95, 24.79, 24.56, 23.48; HRMS Calcd for C<sub>14</sub>H<sub>24</sub>BNNaO<sub>3</sub> [M+Na<sup>+</sup>]: 288.1747, Found: 288.1740.

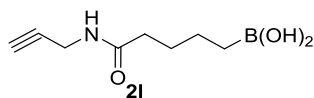

Compound **21** was prepared following a reported procedure<sup>9</sup>: to a solution of compound **21-1** (662 mg, 2.5 mmol, 1.0 equiv) in a mixture of THF (16 mL) and H<sub>2</sub>O (4 mL), 2 N HCl (0.8

mL) and NaIO<sub>4</sub> (1.60 g, 7.5 mmol, 3.0 equiv) were added. The mixture was stirred at room temperature until compound **2l-1** was completely consumed monitoring by TLC. The reaction mixture was extracted with EtOAc, and the combined organic phases were washed with brine, dried over Na<sub>2</sub>SO<sub>4</sub> and filtrated. The filtrate was concentrated *in vacuo* to approximately 5 mL. Petroleum ether was then added under stirring. The resultant precipitate was collected by filtration, washed with petroleum ether and dried under high vacuum to afford the desired product **2l** as a white solid (180 mg, 39%). <sup>1</sup>H NMR (DMSO-*d*<sub>6</sub>, 400 MHz) δ 8.24 (t, *J* = 4.8 Hz, 1H), 7.39 (s, 2H), 3.83-3.81 (m, 2H), 3.08 (t, *J* = 2.0 Hz, 1H), 2.04 (t, *J* = 7.5 Hz, 2H), 1.49-1.43 (m, 2H), 1.35-1.27 (m, 2H), 0.60 (t, *J* = 7.7 Hz, 2H); <sup>13</sup>C NMR (DMSO-*d*<sub>6</sub>, 100 MHz) δ 172.06, 81.36, 72.72, 35.16, 28.13, 27.66, 23.97, 15.16; HRMS Calcd for C<sub>8</sub>H<sub>14</sub>BNNaO<sub>3</sub> [M+Na<sup>+</sup>]: 206.0964, Found: 206.0928.

#### 4.4 Synthesis of alkyl boronic acid **2r**

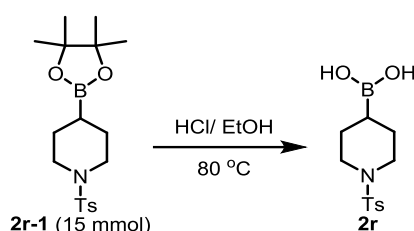

**Scheme S10.**

Compound **2r** was prepared following a reported procedure<sup>9</sup>: to a mixture of EtOH (10 mL) and concentrated hydrogen chloride (18 mL) was added compound **2r-1** (4.7 g, 15 mmol, 1.0 equiv). The mixture was stirred for 10 minutes at room temperature and then heated at 80 °C until the boronic esters were completely consumed monitoring by TLC. After cooled to room temperature, the reaction mixture was diluted with water and extracted with EtOAc. The combined organic phases were washed with brine, dried over Na<sub>2</sub>SO<sub>4</sub> and filtrated. The filtrate was concentrated *in vacuo* and residue was recrystallized from EtOAc and petroleum ether to afford compound **2r** as a white solid (1.06 g, 55%). Spectra data are consistent with those reported in the literature.<sup>9</sup>

#### 5. Reaction optimization for Minisci C-H alkylation of compound **1**

All screening reactions were carried out at a 0.2 mmol scale in a 4 mL glass vial (Thermo Scientific, National B7999-2). The vials were purged with Ar for 1 min, sealed with PTEF cap and stirred on bench top. Stock solution of Ru(bpy)<sub>3</sub>Cl<sub>2</sub> (0.04 mmol in 10 mL of HFIP) was used if necessary. A 20 W compact household fluorescent bulb was positioned 10 cm aside from the reaction vials if necessary.

Compound **1** (32.8 mg, 0.2 mmol, 1.0 equiv) and other specified reagents were dispersed in 0.5 mL of solvent containing photocatalyst. The mixture was stirred at specified temperature with or without light irradiation for 24 h. After removal of the solvent *in vacuo*, the residue was dissolved in 3 mL of CDCl<sub>3</sub> along with Cl<sub>2</sub>CHCHCl<sub>2</sub> (20 μL) as an internal standard for <sup>1</sup>H NMR analysis. The composition of reaction mixture was analyzed based on the methylene group peaks at 2.95 ppm (t, *J* = 8.0 Hz, 2H) for compound **3a**.

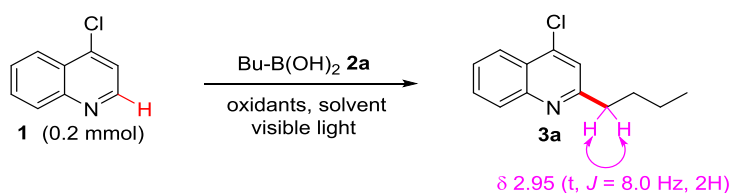

| Entry | Reagents (equiv) / atmosphere                                                                                                 | Solvents/ mL           | t (°C) / Time (h) | Yield (%) <sup>a</sup> <b>3a</b> |
|-------|-------------------------------------------------------------------------------------------------------------------------------|------------------------|-------------------|----------------------------------|
| 1     | <b>2a</b> (1.5), BI-OH (2), Ar                                                                                                | HFIP/0.5               | 80 / 48           | 20                               |
| 2     | <b>2a</b> (1.5), BI-OAc (2), Ar                                                                                               | HFIP/0.5               | 80 / 48           | 28                               |
| 3     | <b>2a</b> (1.5), BI-OAc (2), Ar                                                                                               | CHCl <sub>3</sub> /0.5 | 80 / 48           | <2                               |
| 4     | <b>2a</b> (1.5), BI-OAc (2), Ar                                                                                               | CH <sub>3</sub> CN/0.5 | 80 / 48           | <2                               |
| 5     | <b>2a</b> (1.5), BI-OAc (2), Ar                                                                                               | TFE/0.5                | 30 / 24           | 34                               |
| 6     | <b>2a</b> (1.5), PhI(CF <sub>3</sub> COO) <sub>2</sub> (2), Ru(bpy) <sub>3</sub> Cl <sub>2</sub> (0.01), VL <sup>b</sup> , Ar | HFIP/0.5               | 30 / 24           | <2                               |
| 7     | <b>2a</b> (1.5), BI-OAc (2), Ru(bpy) <sub>3</sub> Cl <sub>2</sub> (0.01), VL, Ar                                              | HFIP/0.25              | 30 / 24           | 69                               |
| 8     | <b>2a</b> (1.5), BI-OAc (2), Ru(bpy) <sub>3</sub> Cl <sub>2</sub> (0.01), VL, Ar                                              | HFIP/1.0               | 30 / 24           | 48                               |

<sup>a</sup>) Yields are based on <sup>1</sup>H-NMR analysis on a 0.2 mmol scale. <sup>b</sup>) VL: compact household fluorescent bulb, 20 W.

**Table S1. Minisci C-H alkylation of compound 1**

## 6. General procedure and substrate scope for Minisci C-H alkylation

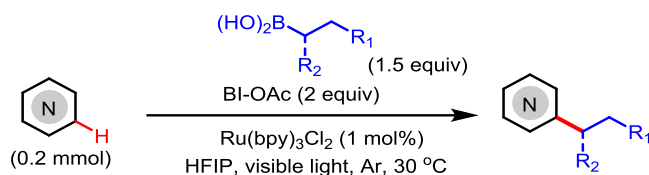

**General condition:** *N*-heteroaromatic substrate (0.2 mmol, 1.0 equiv), alkyl boronic acid (0.3 mmol, 1.5 equiv) and BI-OAc (0.4 mmol, 2.0 equiv) were added to a solution of  $\text{Ru}(\text{bpy})_3\text{Cl}_2$  (0.002 mmol, 0.01 equiv) in HFIP (0.5 mL). The reaction vial was purged with Ar for 1 min and then the mixture was stirred at 30 °C under the fluorescent light irradiation for 1-48 h. The solvent was removed *in vacuo* and the residue was dissolved in DCM (3 mL). To the solution was added  $\text{K}_2\text{CO}_3$  (approximate 150 mg), and the resulting mixture was vigorously stirred for 5 min. Then the mixture was filtrated through a pad of Celite and washed with DCM. The filtrate was concentrated *in vacuo* and the residue was purified by preparative thin layer chromatography or flash chromatography on silica gel to afford the desired product.

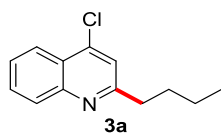

$R_f = 0.6$ , 20% EtOAc in Hexane

Compound **3a** was prepared following the general procedure (24 h) in 82% yield as a colorless oil.  $^1\text{H NMR}$  (400 MHz,  $\text{CDCl}_3$ )  $\delta$  8.18 (dd,  $J = 8.3, 0.6$  Hz, 1H), 8.05 (d,  $J = 8.4$  Hz, 1H), 7.75-7.71 (m, 1H), 7.60-7.56 (m, 1H), 7.40 (s, 1H), 2.95 (t,  $J = 8.0$  Hz, 2H), 1.83-1.76 (m, 2H), 1.49-1.40 (m, 2H), 0.97 (t,  $J = 7.4$  Hz, 3H);  $^{13}\text{C NMR}$  (100 MHz,  $\text{CDCl}_3$ )  $\delta$  163.04, 148.73, 142.48, 130.23, 129.14, 126.60, 124.89, 123.89, 121.33, 38.84, 31.91, 22.59, 13.93; **HRMS** Calcd for  $\text{C}_{13}\text{H}_{15}\text{ClN}$  [ $\text{M}+\text{H}^+$ ]: 220.0893, Found: 220.0929.

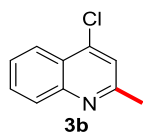

$R_f = 0.2$ , 10% Methyl *tert*-butyl ether in Hexane

Compound **3b** was prepared following the general procedure (**2b'** 2.0 equiv, 48 h) in 46% yield as a colorless oil.  $^1\text{H NMR}$  (400 MHz,  $\text{CDCl}_3$ )  $\delta$  8.19 (dd,  $J = 8.4, 0.9$  Hz, 1H), 8.03 (d,  $J = 8.4$  Hz, 1H), 7.76-7.72 (m, 1H), 7.61-7.56 (m, 1H), 7.41 (s, 1H), 2.73 (s, 3H). Spectra data are consistent with those reported in the literature.<sup>10</sup>

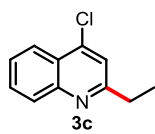

$R_f = 0.5$ , 20% EtOAc in Hexane

Compound **3c** was prepared following the general procedure (24 h) in 80% yield as a colorless oil.  **$^1\text{H NMR}$**  (400 MHz,  $\text{CDCl}_3$ )  $\delta$  8.19 (dd,  $J = 8.4, 0.9$  Hz, 1H), 8.05 (dd,  $J = 8.5, 0.4$  Hz, 1H), 7.76-7.72 (m, 1H), 7.60-7.56 (m, 1H), 7.42 (s, 1H), 2.99 (q,  $J = 7.6$  Hz, 2H), 1.40 (t,  $J = 7.6$  Hz, 3H);  **$^{13}\text{C NMR}$**  (101 MHz,  $\text{CDCl}_3$ )  $\delta$  163.91, 148.71, 142.62, 130.27, 129.14, 126.63, 124.92, 123.91, 120.88, 32.11, 13.75; **HRMS** Calcd for  $\text{C}_{11}\text{H}_{11}\text{ClN}$  [ $\text{M}+\text{H}^+$ ]: 192.0580, Found: 192.0577.

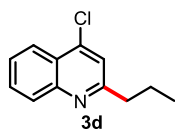

$R_f = 0.5$ , 20% EtOAc in Hexane

Compound **3d** was prepared following the general procedure (24 h) in 85% yield as a colorless oil.  **$^1\text{H NMR}$**  (400 MHz,  $\text{CDCl}_3$ )  $\delta$  8.18 (d,  $J = 8.4$  Hz, 1H), 8.05 (d,  $J = 8.4$  Hz, 1H), 7.73 (dd,  $J = 8.4, 7.2$  Hz, 1H), 7.58 (dd,  $J = 8.4, 7.2$  Hz, 1H), 7.40 (s, 1H), 2.93 (t,  $J = 7.6$  Hz, 2H), 1.89-1.80 (m, 2H), 1.03 (t,  $J = 7.3$  Hz, 2H);  **$^{13}\text{C NMR}$**  (100 MHz,  $\text{CDCl}_3$ )  $\delta$  162.82, 148.73, 142.48, 130.24, 129.15, 126.61, 124.91, 123.89, 121.35, 41.01, 23.05, 13.93; **HRMS** Calcd for  $\text{C}_{12}\text{H}_{13}\text{ClN}$  [ $\text{M}+\text{H}^+$ ]: 206.0737, Found: 206.0773.

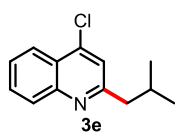

$R_f = 0.6$ , 20% EtOAc in Hexane

Compound **3e** was prepared following the general procedure (24 h) in 78% yield as a colorless oil.  **$^1\text{H NMR}$**  (400 MHz,  $\text{CDCl}_3$ )  $\delta$  8.19 (dd,  $J = 8.4, 0.7$  Hz, 1H), 8.06 (d,  $J = 8.2$  Hz, 1H), 7.74-7.72 (m, 1H), 7.60-7.56 (m, 1H), 7.38 (s, 1H), 2.82 (d,  $J = 7.4$  Hz, 2H), 2.27-2.16 (m, 1H), 0.99 (d,  $J = 6.6$  Hz, 6H);  **$^{13}\text{C NMR}$**  (100 MHz,  $\text{CDCl}_3$ )  $\delta$  162.16, 148.72, 142.26, 130.18, 129.19, 126.59, 124.85, 123.86, 121.89, 121.85, 48.02, 29.30, 22.46; **HRMS** Calcd for  $\text{C}_{13}\text{H}_{15}\text{ClN}$  [ $\text{M}+\text{H}^+$ ]: 220.0893, Found: 220.0890.

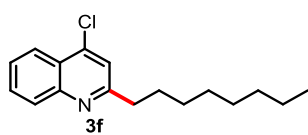

$R_f = 0.6$ , 10% EtOAc in Hexane

Compound **3f** was prepared following the general procedure (24 h) in 73% yield as a colorless oil.  $^1\text{H NMR}$  (400 MHz,  $\text{CDCl}_3$ )  $\delta$  8.18 (dd,  $J = 8.4, 1.0$  Hz, 1H), 8.05 (d,  $J = 8.4$  Hz, 1H), 7.76-7.71 (m, 1H), 7.60-7.56 (m, 1H), 7.40 (s, 1H), 2.94 (t,  $J = 8.0$  Hz, 2H), 1.84-1.76 (m, 2H), 1.43-1.27 (m, 10H), 0.87 (t,  $J = 7.0$  Hz, 3H);  $^{13}\text{C NMR}$  (100 MHz,  $\text{CDCl}_3$ )  $\delta$  163.07, 148.73, 142.47, 130.23, 129.15, 126.59, 124.89, 123.89, 121.33, 39.14, 31.82, 29.83, 29.48, 29.42, 29.18, 22.64, 14.09; **HRMS** Calcd for  $\text{C}_{17}\text{H}_{23}\text{ClN}$  [ $\text{M}+\text{H}^+$ ]: 276.1519, Found: 276.1515.

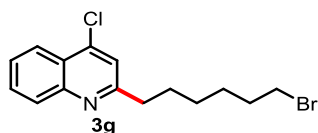

$R_f = 0.5$ , 10% EtOAc in Hexane

Compound **3g** was prepared following the general procedure (24 h) in 60% yield as a colorless oil.  $^1\text{H NMR}$  (400 MHz,  $\text{CDCl}_3$ )  $\delta$  8.19 (dd,  $J = 8.4, 0.8$  Hz, 1H), 8.05 (d,  $J = 8.4$  Hz, 1H), 7.76-7.72 (m, 1H), 7.61-7.57 (m, 1H), 7.40 (s, 1H), 3.41 (t,  $J = 6.8$  Hz, 2H), 2.95 (t,  $J = 7.8$  Hz, 2H), 1.91-1.80 (m, 4H), 1.55-1.41 (m, 4H);  $^{13}\text{C NMR}$  (100 MHz,  $\text{CDCl}_3$ )  $\delta$  162.65, 148.71, 142.58, 130.31, 129.13, 126.69, 124.92, 123.92, 121.31, 38.90, 33.87, 32.60, 29.50, 28.52, 27.97; **HRMS** Calcd for  $\text{C}_{15}\text{H}_{18}\text{BrClN}$  [ $\text{M}+\text{H}^+$ ]: 326.0311, Found: 326.0308.

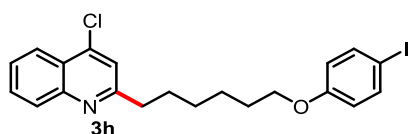

$R_f = 0.4$ , 10% EtOAc in Hexane

Compound **3h** was prepared following the general procedure (24 h) in 60% yield as a colorless solid.  $^1\text{H NMR}$  (400 MHz,  $\text{CDCl}_3$ )  $\delta$  8.19 (dd,  $J = 8.4, 0.9$  Hz, 1H), 8.05 (d,  $J = 8.1$  Hz, 1H), 7.76-7.72 (m, 1H), 7.61-7.56 (m, 1H), 7.54-7.51 (m, 2H), 7.40 (s, 1H), 6.67-6.63 (m, 2H), 3.90 (t,  $J = 6.5$  Hz, 2H), 2.95 (t,  $J = 7.8$  Hz, 2H), 1.86-1.76 (m, 4H), 1.56-1.43 (m, 4H);  $^{13}\text{C NMR}$  (100 MHz,  $\text{CDCl}_3$ )  $\delta$  162.73, 158.90, 148.69, 142.55, 138.10, 130.29, 129.12, 126.67, 124.90,

123.91, 121.30, 116.86, 82.41, 67.89, 38.93, 29.60, 29.07, 28.95, 25.82; **HRMS** Calcd for  $C_{21}H_{22}ClINO$   $[M+H^+]$ : 466.0435, Found: 466.0430.

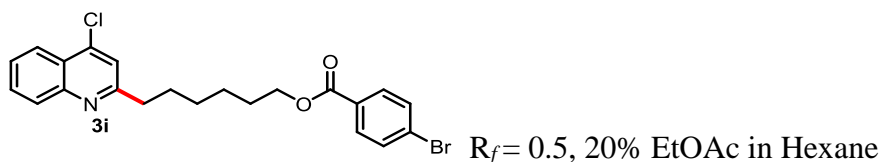

Compound **3i** was prepared following the general procedure (24 h) in 77% yield as a colorless solid.  **$^1H$  NMR** (400 MHz,  $CDCl_3$ )  $\delta$  8.19 (d,  $J = 8.3$  Hz, 1H), 8.04 (d,  $J = 8.4$  Hz, 1H), 7.89 (d,  $J = 8.5$  Hz, 2H), 7.79 -7.69 (m, 1H), 7.61-7.56 (m, 3H), 7.40 (s, 1H), 4.31 (t,  $J = 6.6$  Hz, 2H), 2.96 (t,  $J = 7.8$  Hz, 3H), 1.89-1.75 (m, 4H), 1.56-1.43 (m, 4H);  **$^{13}C$  NMR** (100 MHz,  $CDCl_3$ )  $\delta$  165.86, 162.64, 148.71, 142.52, 131.62, 131.03, 130.27, 129.29, 129.13, 127.87, 126.65, 124.88, 123.89, 121.26, 65.22, 38.91, 29.55, 29.03, 28.52, 25.88; **HRMS** Calcd for  $C_{22}H_{22}BrClNO_2$   $[M+H^+]$ : 446.0522, Found: 446.0520.

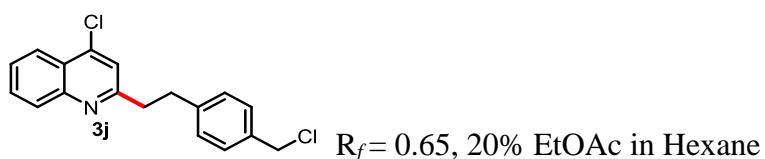

Compound **3j** was prepared following the general procedure (**2j** 2.0 equiv, 10 h) in 55% yield as a colorless solid.  **$^1H$  NMR** (400 MHz,  $CDCl_3$ )  $\delta$  8.19 (d,  $J = 8.3$  Hz, 1H), 8.08 (d,  $J = 8.4$  Hz, 1H), 7.83-7.71 (m, 1H), 7.65 - 7.54 (m, 1H), 7.35 (s, 1H), 7.32 (d,  $J = 8.0$  Hz, 2H), 7.25 (d,  $J = 8.4$  Hz, 2H), 4.57 (s, 2H), 3.27-3.22 (m, 2H), 3.18-3.14 (m, 2H);  **$^{13}C$  NMR** (100 MHz,  $CDCl_3$ )  $\delta$  161.41, 148.77, 142.59, 141.55, 135.31, 130.37, 129.19, 128.85, 128.76, 126.84, 125.00, 123.96, 121.47, 46.15, 40.49, 35.19; **HRMS** Calcd for  $C_{18}H_{16}Cl_2N$   $[M+H^+]$ : 316.0660, Found: 301.0663.

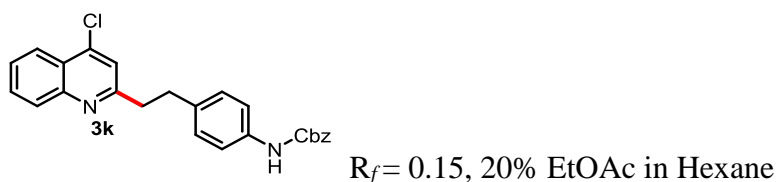

Compound **3k** was prepared following the general procedure (10 h) in 74% yield as a colorless solid.  **$^1H$  NMR** (400 MHz,  $CDCl_3$ )  $\delta$  8.18 (d,  $J = 8.3$  Hz, 1H), 8.07 (d,  $J = 8.4$  Hz, 1H), 7.76-

7.72 (m, 1H), 7.61-7.59 (m, 1H), 7.38-7.29 (m, 8H), 7.17 (d,  $J = 8.3$  Hz, 2H), 6.72 (s, 1H), 5.19 (s, 2H), 3.24-3.20 (m, 2H), 3.12-3.08 (m, 2H);  $^{13}\text{C}$  NMR (100 MHz,  $\text{CDCl}_3$ )  $\delta$  161.60, 153.34, 148.74, 142.54, 136.33, 136.05, 135.83, 130.33, 129.15, 129.03, 128.58, 128.30, 128.28, 126.78, 124.98, 123.94, 121.50, 118.84, 66.94, 40.69, 34.88; HRMS Calcd for  $\text{C}_{25}\text{H}_{22}\text{ClN}_2\text{O}_2$  [ $\text{M}+\text{H}^+$ ]: 417.1370, Found: 417.1368.

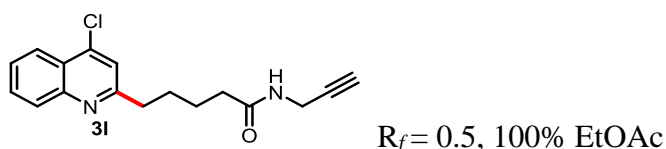

Compound **3l** was prepared following the general procedure (24 h) in 52% yield as a colorless solid.  $^1\text{H}$  NMR (400 MHz,  $\text{CDCl}_3$ )  $\delta$  8.19 (dd,  $J = 8.3, 0.6$  Hz, 1H), 8.04 (d,  $J = 8.4$  Hz, 1H), 7.76-7.72 (m, 1H), 7.61-7.57 (m, 1H), 7.40 (s, 1H), 5.85 (s, 1H), 4.06-4.04 (m, 2H), 2.97 (t,  $J = 7.5$  Hz, 2H), 2.27 (t,  $J = 7.3$  Hz, 2H), 2.22 (t,  $J = 2.5$  Hz, 1H), 1.91-1.84 (m, 2H), 1.81-1.74 (m, 2H);  $^{13}\text{C}$  NMR (100 MHz,  $\text{CDCl}_3$ )  $\delta$  172.25, 162.19, 148.66, 142.67, 130.34, 129.07, 126.74, 124.94, 123.94, 121.35, 79.58, 1.54, 38.44, 36.04, 29.11, 28.90, 25.08; HRMS Calcd for  $\text{C}_{17}\text{H}_{18}\text{ClN}_2\text{O}$  [ $\text{M}+\text{H}^+$ ]: 301.1108, Found: 301.1198.

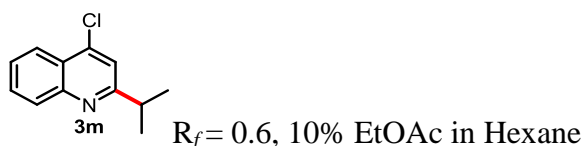

Compound **3m** was prepared following the general procedure (1 h) in 88% yield as a colorless oil.  $^1\text{H}$  NMR (400 MHz,  $\text{CDCl}_3$ )  $\delta$  8.17 (d,  $J = 8.0$  Hz, 1H), 8.06 (d,  $J = 8.4$  Hz, 1H), 7.75-7.71 (m, 1H), 7.59-7.55 (m, 1H), 7.43 (s, 1H), 3.28-3.18 (m, 1H), 1.39 (d,  $J = 6.9$  Hz, 6H). Spectra data are consistent with those reported in the literature.<sup>11</sup>

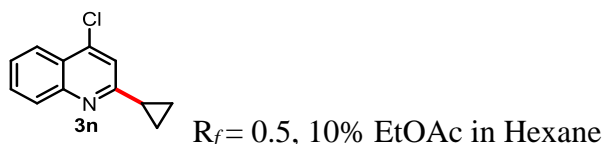

Compound **3n** was prepared following the general procedure (24 h) in 56% yield as a colorless oil.  $^1\text{H}$  NMR (400 MHz,  $\text{CDCl}_3$ )  $\delta$  8.14 (dd,  $J = 8.4, 0.9$  Hz, 1H), 7.96 (d,  $J = 8.4$  Hz, 1H),



7.72-7.68 (m, 1H), 7.55-7.51 (m, 1H), 7.29 (s, 1H), 2.23-2.17 (m, 1H), 1.19-1.14 (m, 1H), 1.13-1.08 (m, 1H);  $^{13}\text{C}$  NMR (100 MHz,  $\text{CDCl}_3$ )  $\delta$  163.49, 148.80, 142.13, 130.18, 128.97, 126.09, 124.85, 123.89, 119.56, 17.95, 10.47; HRMS Calcd for  $\text{C}_{12}\text{H}_{11}\text{ClN}$  [ $\text{M}+\text{H}^+$ ]: 204.0580, Found: 204.0627.

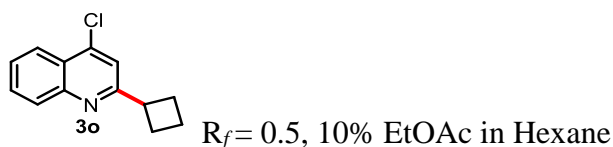

Compound **3o** was prepared following the general procedure (10 h) in 82% yield as a colorless oil.  $^1\text{H}$  NMR (400 MHz,  $\text{CDCl}_3$ )  $\delta$  8.14 (dd,  $J = 8.4, 0.9$  Hz, 1H), 8.07 (d,  $J = 8.3$  Hz, 1H), 7.75-7.70 (m, 1H), 7.59-7.54 (m, 1H), 7.43 (s, 1H), 3.87-3.78 (m, 1H), 2.48-2.42 (m, 4H), 2.18-2.06 (m, 1H), 2.00-1.92 (m, 1H). Spectra data are consistent with those reported in the literature.<sup>12</sup>

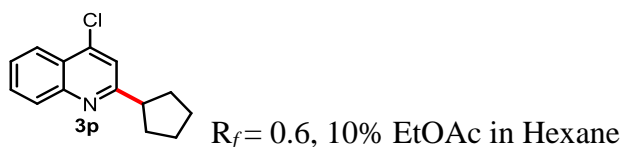

Compound **3p** was prepared following the general procedure (1 h) in 87% yield as a colorless oil.  $^1\text{H}$  NMR (400 MHz,  $\text{CDCl}_3$ )  $\delta$  8.16 (dd,  $J = 8.3, 1.0$  Hz, 1H), 8.04 (d,  $J = 8.4$  Hz, 1H), 7.74-7.70 (m, 1H), 7.58-7.54 (m, 1H), 7.43 (s, 1H), 3.39-3.30 (m, 1H), 2.21-2.14 (m, 2H), 1.94-1.73 (m, 6H);  $^{13}\text{C}$  NMR (100 MHz,  $\text{CDCl}_3$ )  $\delta$  166.25, 148.49, 142.40, 130.11, 129.24, 126.51, 124.99, 123.82, 120.15, 48.61, 33.45, 25.93; HRMS Calcd for  $\text{C}_{14}\text{H}_{15}\text{ClN}$  [ $\text{M}+\text{H}^+$ ]: 232.0893, Found: 232.0892.

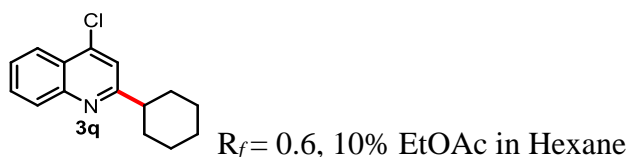

Compound **3q** was prepared following the general procedure (1 h) in 88% yield as a colorless oil.  $^1\text{H}$  NMR (400 MHz,  $\text{CDCl}_3$ )  $\delta$  8.17 (d,  $J = 8.3$  Hz, 1H), 8.05 (d,  $J = 8.5$  Hz, 1H), 7.74-7.70 (m, 1H), 7.59-7.54 (m, 1H), 7.42 (s, 1H), 2.92-2.86 (m, 1H), 2.04-2.00 (m, 2H), 1.92-1.87 (m,

2H), 1.80-1.77 (m, 1H), 1.66-1.56 (m, 2H), 1.51-1.40 (m, 2H), 1.38-1.30 (m, 1H);  $^{13}\text{C}$  NMR (100 MHz,  $\text{CDCl}_3$ )  $\delta$  166.79, 148.59, 142.57, 130.13, 129.24, 126.55, 125.08, 123.86, 119.74, 47.38, 32.65, 26.38, 25.95; HRMS Calcd for  $\text{C}_{15}\text{H}_{17}\text{ClN}$  [ $\text{M}+\text{H}^+$ ]: 246.1050, Found: 246.1048.

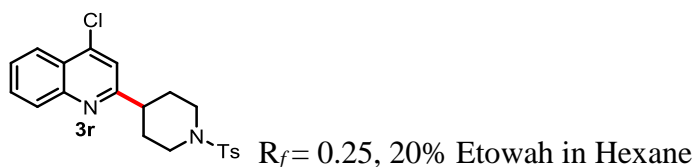

Compound **3r** was prepared following the general procedure (3 h) in 86% yield as a colorless solid.  $^1\text{H}$  NMR (400 MHz,  $\text{CDCl}_3$ )  $\delta$  8.18 (dd,  $J = 8.3, 0.7$  Hz, 1H), 8.00 (d,  $J = 8.4$  Hz, 1H), 7.78-7.72 (m, 1H), 7.70 (d,  $J = 8.2$  Hz, 2H), 7.62-7.58 (m, 1H), 7.36 (d,  $J = 8.2$  Hz, 2H), 7.34 (s, 1H), 3.99-3.94 (m, 2H), 2.84-2.76 (m, 1H), 2.49-2.42 (m, 5H), 2.07-1.98 (m, 4H);  $^{13}\text{C}$  NMR (100 MHz,  $\text{CDCl}_3$ )  $\delta$  163.62, 148.55, 143.49, 142.92, 133.25, 130.40, 129.62, 129.33, 127.69, 127.00, 125.17, 123.88, 119.42, 46.27, 44.05, 30.74, 21.51; HRMS Calcd for  $\text{C}_{21}\text{H}_{22}\text{ClN}_2\text{O}_2\text{S}$  [ $\text{M}+\text{H}^+$ ]: 401.1091, Found: 401.1088.

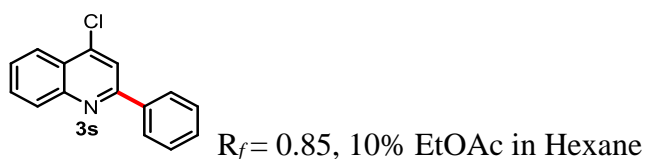

Compound **1** (32.8 mg, 0.2 mmol, 1.0 equiv), phenyl boronic acid **2t** (36.8 mg, 0.3 mmol, 1.5 equiv), BI-OAc (122.4 mg, 0.4 mmol, 2.0 equiv) and TFA (38.8 mg, 0.4 mmol, 2.0 equiv) were added to a solution of  $\text{Ru}(\text{bpy})_3\text{Cl}_2$  (1.28 mg, 0.002 mmol, 0.01 equiv) in HFIP (0.5 mL). The reaction vial was purged with Ar for 1 min and then the mixture was stirred at 30 °C under the fluorescent light irradiation for 24 h. The solvent was removed *in vacuo* and the residue was dissolved in DCM (3 mL). To the solution was added  $\text{K}_2\text{CO}_3$  (approximate 150 mg), the mixture was vigorously stirred for 5 min. After that, the mixture was filtrated through a pad of Celite and washed with DCM. The filtrate was concentrated *in vacuo* and the residue was purified by flash chromatography on silica gel to afford compound **3r** as a colorless solid (10.0 mg, 21% yield).  $^1\text{H}$  NMR (400 MHz,  $\text{CDCl}_3$ )  $\delta$  8.24 (dd,  $J = 8.3, 0.7$  Hz, 1H), 8.20-8.14 (m, 3H), 7.98 (s, 1H), 7.81-7.76 (m, 1H), 7.65-7.61 (m, 1H), 7.56-7.47 (m, 3H). Spectra data are consistent with those reported in the literature.<sup>13</sup>

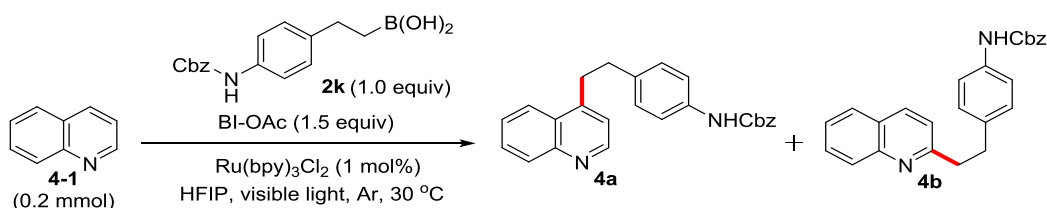

**Scheme S11.**

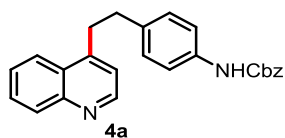

$R_f = 0.25$ , 40% EtOAc in Hexane

Compound **4a** was prepared following the general procedure (**2k** 1.0 equiv, BI-OAc 1.5 equiv, 10 h) in 39% yield as a colorless solid.  $^1\text{H NMR}$  (400 MHz,  $\text{CDCl}_3$ )  $\delta$  8.77 (d,  $J = 4.4$  Hz, 1H), 8.13 (d,  $J = 8.4$  Hz, 1H), 8.06 (d,  $J = 8.4$  Hz, 1H), 7.72-7.68 (m, 1H), 7.59-7.55 (m, 1H), 7.41-7.31 (m, 7H), 7.14 (d,  $J = 4.5$  Hz, 1H), 7.12 (d,  $J = 8.4$  Hz, 2H), 6.88 (br s, 1H), 5.20 (s, 2H), 3.36-3.32 (m, 2H), 3.04-3.00 (m, 2H);  $^{13}\text{C NMR}$  (100 MHz,  $\text{CDCl}_3$ )  $\delta$  153.38, 150.09, 148.24, 147.32, 136.09, 136.03, 130.22, 129.57, 129.06, 128.92, 128.57, 128.31, 128.26, 127.35, 126.42, 123.32, 120.89, 118.89, 66.94, 35.41, 34.07; **HRMS** Calcd for  $\text{C}_{25}\text{H}_{23}\text{N}_2\text{O}_2$  [ $\text{M}+\text{H}^+$ ]: 383.1760, Found: 383.1819.

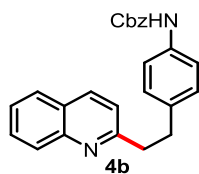

$R_f = 0.6$ , 40% EtOAc in Hexane

Compound **4b** was prepared following the general procedure (**2k** 1.0 equiv, BI-OAc 1.5 equiv, 10 h) in 11% yield as a colorless solid.  $^1\text{H NMR}$  (400 MHz,  $\text{CDCl}_3$ )  $\delta$  8.06 (d,  $J = 8.6$  Hz, 1H), 8.04 (d,  $J = 8.6$  Hz, 1H), 7.78 (d,  $J = 8.1$  Hz, 1H), 7.72-7.68 (m, 1H), 7.52-7.48 (m, 1H), 7.41-7.28 (m, 7H), 7.21 (d,  $J = 8.4$  Hz, 1H), 7.17 (d,  $J = 8.4$  Hz, 2H), 6.65 (br s, 1H), 5.19 (s, 2H), 3.28-3.24 (m, 2H), 3.13-3.09 (m, 2H);  $^{13}\text{C NMR}$  (100 MHz,  $\text{CDCl}_3$ )  $\delta$  161.70, 147.96, 136.74, 136.20, 136.08, 135.71, 129.39, 129.09, 128.83, 128.60, 128.32, 128.30, 127.52, 126.78, 125.79, 121.58, 118.79, 66.95, 40.98, 35.21; **HRMS** Calcd for  $\text{C}_{25}\text{H}_{23}\text{N}_2\text{O}_2$  [ $\text{M}+\text{H}^+$ ]: 383.1760, Found: 383.1819.

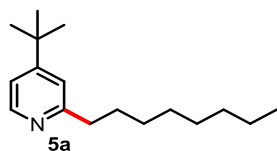

$R_f = 0.4$ , 10% EtOAc in Hexane

Compound **5a** was prepared following the general procedure (48 h) in 52% yield as a colorless oil.  $^1\text{H NMR}$  (400 MHz,  $\text{CDCl}_3$ )  $\delta$  8.41 (d,  $J = 5.3$  Hz, 1H), 7.11 (s, 1H), 7.08 (dd,  $J = 5.3, 1.7$  Hz, 1H), 2.76 (t,  $J = 7.8$  Hz, 2H), 1.75-1.68 (m, 2H), 1.38-1.26 (m, 19H), 0.87 (t,  $J = 6.7$  Hz, 3H);  $^{13}\text{C NMR}$  (100 MHz,  $\text{CDCl}_3$ )  $\delta$  162.25, 160.18, 148.94, 119.54, 118.00, 38.66, 34.56, 31.85, 30.55, 30.10, 29.50, 29.45, 29.23, 22.65, 14.09; **HRMS** Calcd for  $\text{C}_{17}\text{H}_{30}\text{N}$  [ $\text{M}+\text{H}^+$ ]: 248.2378, Found: 248.2376.

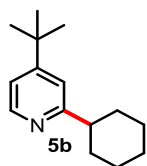

$R_f = 0.4$ , 10% EtOAc in Hexane

Compound **5b** was prepared following the general procedure (16 h) in 53% yield as a colorless oil.  $^1\text{H NMR}$  (400 MHz,  $\text{CDCl}_3$ )  $\delta$  8.43 (d,  $J = 5.3$  Hz, 1H), 7.12 (d,  $J = 1.9$  Hz, 1H), 7.09 (dd,  $J = 5.3, 1.9$  Hz, 1H), 2.71-2.64 (m, 1H), 1.96-1.84 (m, 4H), 1.77-1.73 (m, 1H), 1.60-1.51 (m, 2H), 1.47-1.39 (m, 2H), 1.37-1.27 (m, 10H);  $^{13}\text{C NMR}$  (100 MHz,  $\text{CDCl}_3$ )  $\delta$  166.23, 160.18, 148.82, 118.18, 117.90, 46.76, 34.63, 32.99, 30.57, 26.63, 26.05; **HRMS** Calcd for  $\text{C}_{15}\text{H}_{24}\text{N}$  [ $\text{M}+\text{H}^+$ ]: 218.1909, Found: 218.1906.

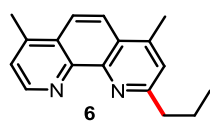

$R_f = 0.2$ , 100% EtOAc

Compound **6** was prepared following the general procedure (24 h) in 70% yield as a colorless oil.  $^1\text{H NMR}$  (400 MHz,  $\text{CDCl}_3$ )  $\delta$  9.08 (d,  $J = 4.5$  Hz, 1H), 8.01-7.95 (m, 2H), 7.43 (dd,  $J = 4.5, 0.5$  Hz, 1H), 7.38 (d,  $J = 0.5$  Hz, 1H), 3.17-3.13 (m, 2H), 2.79 (s, 3H), 2.77 (s, 3H), 1.96-1.86 (m, 2H), 1.07 (t,  $J = 7.3$  Hz, 3H);  $^{13}\text{C NMR}$  (100 MHz,  $\text{CDCl}_3$ )  $\delta$  162.91, 149.81, 145.97, 145.75, 144.06, 143.98, 127.90, 126.15, 123.66, 123.59, 122.00, 120.93, 41.46, 23.66, 19.11, 14.20; **HRMS** Calcd for  $\text{C}_{17}\text{H}_{19}\text{N}_2$  [ $\text{M}+\text{H}^+$ ]: 251.1548, Found: 251.1544.

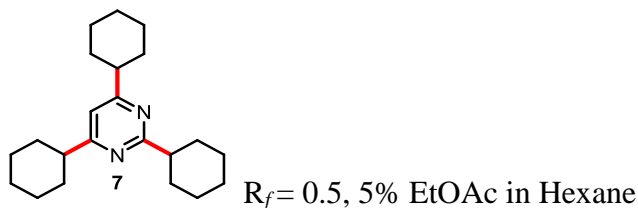

Compound **7-1** (16.2 mg, 0.2 mmol, 1.0 equiv), boronic acid **2q** (115.2 mg, 0.9 mmol, 4.5 equiv) and BI-OAc (367.4 mg, 1.2 mmol, 6.0 equiv) were added to a solution of Ru(bpy)<sub>3</sub>Cl<sub>2</sub> (1.28 mg, 0.002 mmol, 0.01 equiv) in HFIP (0.5 mL). The reaction vial was purged with Ar for 1 min and then the mixture was stirred at 30 °C under the fluorescent light irradiation for 1 h. The solvent was removed *in vacuo* and the residue was dissolved in DCM (3 mL). To the solution was added K<sub>2</sub>CO<sub>3</sub> (approximate 450 mg), the mixture was vigorously stirred for 5 min. After that, the mixture was filtrated through a pad of Celite and washed with DCM. The filtrate was concentrated *in vacuo* and the residue was purified by flash chromatography on silica gel to afford compound **7** as a colorless oil (41.2 mg, 63% yield). **<sup>1</sup>H NMR** (400 MHz, CDCl<sub>3</sub>) δ 6.77 (s, 1H), 2.83-2.75 (m, 1H), 2.61-2.55 (m, 2H), 1.95-1.63 (m, 17H), 1.52-1.25 (m, 13H). Spectra data are consistent with those reported in the literature.<sup>14</sup>

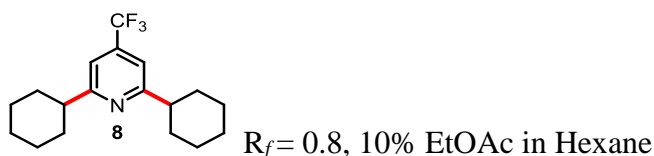

Compound **8-1** (29.5 mg, 0.2 mmol, 1.0 equiv), boronic acid **2q** (76.6 mg, 0.6 mmol, 3.0 equiv) and BI-OAc (244.8 mg, 0.8 mmol, 4.0 equiv) were added to a solution of Ru(bpy)<sub>3</sub>Cl<sub>2</sub> (1.28 mg, 0.002 mmol, 0.001 equiv) in HFIP (0.5 mL). The reaction vial was purged with Ar for 1 min and then the mixture was stirred at 30 °C under the fluorescent light irradiation for 2 h. The solvent was removed *in vacuo* and the residue was dissolved in DCM (3 mL). To the solution was added K<sub>2</sub>CO<sub>3</sub> (approximate 450 mg), the mixture was vigorously stirred for 5 min. After that, the mixture was filtrated through a pad of Celite and washed with DCM. The filtrate was concentrated *in vacuo* and the residue was purified by flash chromatography on silica gel to afford compound **8** as a colorless oil (51.0 mg, 82% yield). **<sup>1</sup>H NMR** (400 MHz, CDCl<sub>3</sub>) δ 7.15 (s, 2H), 2.79-2.72 (m, 2H), 1.98-1.74 (m, 10H), 1.56-1.27 (m, 10H); **<sup>13</sup>C NMR** (100 MHz,

$\text{CDCl}_3$   $\delta$  167.14, 138.67 (q,  $J = 32.8$  Hz), 123.35 (q,  $J = 272.9$  Hz), 138.67 (q,  $J = 32.8$  Hz), 46.56, 32.82, 26.41, 25.99; **HRMS** Calcd for  $\text{C}_{18}\text{H}_{25}\text{F}_3\text{N}$  [ $\text{M}+\text{H}^+$ ]: 312.1939, Found: 312.1938.

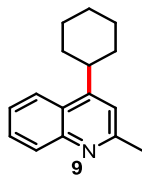

$R_f = 0.4$ , 10% EtOAc in Hexane

Compound **9** was prepared following the general procedure (2 h) in 93% yield as a colorless oil.  **$^1\text{H NMR}$**  (400 MHz,  $\text{CDCl}_3$ )  $\delta$  8.03 (d,  $J = 9.2$  Hz, 2H), 7.66-7.62 (m, 1H), 7.50-7.46 (m, 1H), 7.16 (s, 1H), 3.31-3.26 (m, 1H), 2.71 (s, 3H), 2.01-1.83 (m, 5H), 1.60-1.48 (m, 4H), 1.40-1.28 (m, 1H). Spectra data are consistent with those reported in the literature.<sup>14</sup>

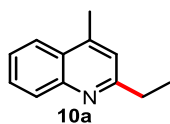

$R_f = 0.5$ , 10% EtOAc in Hexane

Compound **10a** was prepared following the general procedure (24 h) in 80% yield as a colorless oil.  **$^1\text{H NMR}$**  (400 MHz,  $\text{CDCl}_3$ )  $\delta$  8.04 (d,  $J = 8.4$  Hz, 1H), 7.95 (dd,  $J = 8.3, 0.6$  Hz, 1H), 7.69-7.65 (m, 1H), 7.52-7.48 (m, 1H), 7.16 (s, 1H), 2.96 (q,  $J = 7.6$  Hz, 2H), 2.68 (s, 3H), 1.39 (t,  $J = 7.6$  Hz, 3H). Spectra data are consistent with those reported in the literature.<sup>15</sup>

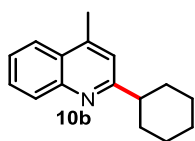

$R_f = 0.6$ , 10% EtOAc in Hexane

Compound **10b** was prepared following the general procedure (1 h) in 96% yield as a colorless oil.  **$^1\text{H NMR}$**  (400 MHz,  $\text{CDCl}_3$ )  $\delta$  8.04 (d,  $J = 8.5$  Hz, 1H), 7.93 (d,  $J = 8.4$  Hz, 1H), 7.68-7.64 (m, 1H), 7.50-7.46 (m, 1H), 7.16 (s, 1H), 2.90-2.84 (m, 1H), 2.67 (s, 3H), 2.01 (d,  $J = 12.7$  Hz, 2H), 1.86-1.91 (m, 2H), 1.80-1.76 (m, 1H), 1.67-1.57 (m, 2H), 1.52-1.41 (m, 2H), 1.39-1.30 (m, 1H). Spectra data are consistent with those reported in the literature.<sup>12</sup>

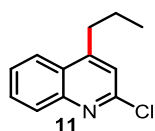

$R_f = 0.4$ , 10% EtOAc in Hexane

Compound **11** was prepared following the general procedure (24 h) in 62% yield as a colorless solid.  $^1\text{H NMR}$  (400 MHz,  $\text{CDCl}_3$ )  $\delta$  8.03-7.99 (m, 2H), 7.73-7.69 (m, 1H), 7.58-7.54 (m, 1H), 7.24 (s, 1H), 3.02 (t,  $J = 7.7$  Hz, 2H), 1.86-1.76 (m, 2H), 1.06 (t,  $J = 7.3$  Hz, 3H);  $^{13}\text{C NMR}$  (100 MHz,  $\text{CDCl}_3$ )  $\delta$  151.94, 150.61, 148.02, 130.08, 129.31, 126.58, 126.31, 123.62, 121.50, 34.00, 22.96, 14.07; **HRMS** Calcd for  $\text{C}_{12}\text{H}_{13}\text{ClN}$  [ $\text{M}+\text{H}^+$ ]: 206.0737, Found: 206.0773.

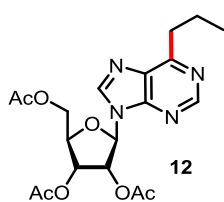

$R_f = 0.6$ , 100% EtOAc

Compound **12** was prepared following the general procedure (24 h) in 60% yield as a colorless oil.  $^1\text{H NMR}$  (400 MHz,  $\text{CDCl}_3$ )  $\delta$  8.90 (s, 1H), 8.18 (s, 1H), 6.24 (d,  $J = 5.1$  Hz, 1H), 5.99 (t,  $J = 5.3$  Hz, 1H), 5.71 (t,  $J = 5.1$  Hz, 1H), 4.49-4.46 (m, 2H), 4.41-4.36 (m, 1H), 3.18 (t,  $J = 7.6$  Hz, 2H), 2.16 (s, 3H), 2.13 (s, 3H), 2.10 (s, 3H), 1.98-1.89 (m, 2H), 1.04 (t,  $J = 7.4$  Hz, 3H). Spectra data are consistent with those reported in the literature.<sup>16</sup>

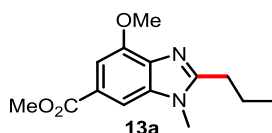

$R_f = 0.6$ , 100% EtOAc

Compound **13a** was prepared following the general procedure (24 h) in 72% yield as a colorless solid.  $^1\text{H NMR}$  (400 MHz,  $\text{CDCl}_3$ )  $\delta$  8.06 (s, 1H), 7.37 (s, 1H), 4.00 (s, 3H), 3.98 (s, 3H), 3.93 (s, 3H), 2.83 (t,  $J = 7.7$  Hz, 2H), 1.94-1.84 (m, 2H), 1.07 (t,  $J = 7.4$  Hz, 3H);  $^{13}\text{C NMR}$  (100 MHz,  $\text{CDCl}_3$ )  $\delta$  167.78, 156.72, 146.39, 143.42, 128.36, 124.09, 115.03, 104.09, 55.72, 52.06, 32.40, 29.25, 20.86, 13.96; **HRMS** Calcd for  $\text{C}_{14}\text{H}_{19}\text{N}_2\text{O}_3$  [ $\text{M}+\text{H}^+$ ]: 263.1396, Found: 263.1391.

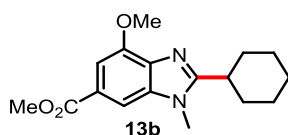

$R_f = 0.5$ , 50% EtOAc in Hexane

Compound **13b** was prepared following the general procedure (1 h) in 90% yield as a colorless solid. **<sup>1</sup>H NMR** (400 MHz, CDCl<sub>3</sub>) δ 8.10 (d, *J* = 1.2 Hz, 1H), 7.36 (d, *J* = 1.2 Hz, 1H), 4.02 (s, 3H), 3.98 (s, 3H), 3.92 (m, 3H), 2.84-2.77 (m, 1H), 2.00-1.90 (m, 4H), 1.82-1.73 (m, 4H), 1.47-1.34 (m, 2H); **<sup>13</sup>C NMR** (100 MHz, CDCl<sub>3</sub>) δ 167.83, 160.47, 146.45, 143.64, 128.33, 123.93, 115.31, 104.03, 55.73, 52.04, 36.02, 32.14, 31.32, 26.25, 25.76; **HRMS** Calcd for C<sub>17</sub>H<sub>23</sub>N<sub>2</sub>O<sub>3</sub> [M+H<sup>+</sup>]: 303.1709, Found: 303.1708.

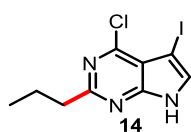

*R<sub>f</sub>* = 0.5, 50% EtOAc in Hexane

Compound **14** was prepared following the general procedure (24 h) in 62% yield as light yellow solid. **<sup>1</sup>H NMR** (400 MHz, CDCl<sub>3</sub>) δ 11.63 (s, 1H), 8.60 (s, 1H), 2.91 (t, *J* = 7.6 Hz, 2H), 1.87-1.78 (m, 2H), 1.06 (t, *J* = 7.3 Hz, 3H); **<sup>13</sup>C NMR** (100 MHz, CDCl<sub>3</sub>) δ 151.93, 151.65, 149.24, 144.13, 117.97, 53.31, 31.08, 22.13, 13.73; **HRMS** Calcd for C<sub>9</sub>H<sub>10</sub>ClIN<sub>3</sub> [M+H<sup>+</sup>]: 321.9608, Found: 321.9605.

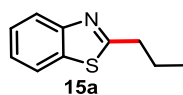

*R<sub>f</sub>* = 0.65, 20% EtOAc in Hexane

Compound **15a** was prepared following the general procedure (24 h) in 82% yield as colorless oil. **<sup>1</sup>H NMR** (400 MHz, CDCl<sub>3</sub>) δ 7.97 (d, *J* = 7.9 Hz, 1H), 7.84 (dd, *J* = 8.0, 0.6 Hz, 1H), 7.47-7.43 (m, 1H), 7.36-7.32 (m, 1H), 3.10 (t, *J* = 7.6 Hz, 2H), 1.96-1.87 (m, 2H), 1.06 (t, *J* = 7.4 Hz, 3H). Spectra data are consistent with those reported in the literature.<sup>17</sup>

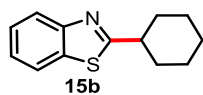

*R<sub>f</sub>* = 0.65, 20% EtOAc in Hexane

Compound **15b** was prepared following the general procedure (2 h) in 88% yield as colorless oil. **<sup>1</sup>H NMR** (400 MHz, CDCl<sub>3</sub>) δ 7.97 (d, *J* = 8.1 Hz, 1H), 7.84 (dd, *J* = 8.0, 0.4 Hz, 1H), 7.46-7.42 (m, 1H), 7.35-7.31 (m, 1H), 3.14-3.07 (m, 1H), 2.22-2.18 (m, 2H), 1.91-1.86 (m, 2H), 1.78-1.74 (m, 1H), 1.69-1.59 (m, 2H), 1.50-1.39 (m, 2H), 1.37-1.29 (m, 1H). Spectra data are consistent with those reported in the literature.<sup>18</sup>



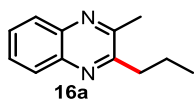

$R_f = 0.65$ , 20% EtOAc in Hexane

Compound **16a** was prepared following the general procedure (24 h) in 64% yield as colorless oil.  $^1\text{H NMR}$  (400 MHz,  $\text{CDCl}_3$ )  $\delta$  8.03-7.96 (m, 2H), 7.69-7.65 (m, 2H), 2.99 (t,  $J = 7.8$  Hz, 2H), 2.77 (s, 3H), 1.92-1.83 (m, 2H), 1.09 (t,  $J = 7.4$  Hz, 3H). Spectra data are consistent with those reported in the literature.<sup>19</sup>

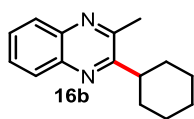

$R_f = 0.4$ , 10% EtOAc in Hexane

Compound **16b** was prepared following the general procedure (10 h) in 78% yield as colorless oil.  $^1\text{H NMR}$  (400 MHz,  $\text{CDCl}_3$ )  $\delta$  8.03-7.99 (m, 1H), 7.98-7.94 (m, 1H), 7.66-7.62 (m, 2H), 3.07-3.00 (m, 1H), 2.79 (s, 3H), 1.96-1.91 (m, 4H), 1.82-1.73 (m, 3H), 1.52-1.36 (m, 3H). Spectra data are consistent with those reported in the literature.<sup>14</sup>

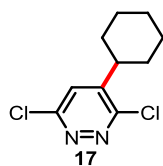

$R_f = 0.7$ , 20% EtOAc in Hexane

Compound **17** was prepared following the general procedure (2 h) in 65% yield as colorless solid.  $^1\text{H NMR}$  (400 MHz,  $\text{CDCl}_3$ )  $\delta$  7.36 (s, 1H), 2.91-2.83 (m, 1H), 1.98-1.90 (m, 4H), 1.85-1.81 (m, 1H), 1.52-1.41 (m, 2H), 1.37-1.26 (m, 3H). Spectra data are consistent with those reported in the literature.<sup>20</sup>

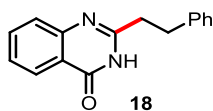

$R_f = 0.6$ , 100% EtOAc

Compound **18** was prepared following the general procedure (24 h) in 67% yield as colorless solid.  $^1\text{H NMR}$  (400 MHz,  $\text{CDCl}_3$ )  $\delta$  12.0 (br s, 1H), 8.31 (dd,  $J = 7.9, 0.9$  Hz, 1H), 7.83-7.78 (m, 1H), 7.75 (d,  $J = 7.7$  Hz, 1H), 7.52-7.48 (m, 1H), 7.35 (d,  $J = 7.2$  Hz, 2H), 7.31-7.27 (m,

2H), 7.23-7.16 (m, 1H), 3.23-3.19 (m, 2H), 3.12-3.08 (m, 2H). Spectra data are consistent with those reported in the literature.<sup>21</sup>

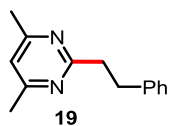

**19**  $R_f = 0.5$ , 50% EtOAc in Hexane

Compound **19** was prepared following the general procedure (24 h) in 64% yield as colorless oil. **<sup>1</sup>H NMR** (400 MHz, CDCl<sub>3</sub>)  $\delta$  7.28 (d,  $J = 4.4$  Hz, 4H), 7.21-7.16 (m, 1H), 6.87 (s, 1H), 3.22-3.17 (m, 2H), 3.14-3.09 (m, 2H), 2.46 (s, 6H); **<sup>13</sup>C NMR** (100 MHz, CDCl<sub>3</sub>)  $\delta$  169.69, 166.53, 141.65, 128.47, 128.27, 125.83, 117.48, 41.27, 34.97, 23.98; **HRMS** Calcd for C<sub>14</sub>H<sub>17</sub>N<sub>2</sub> [M+H<sup>+</sup>]: 213.1392, Found: 213.1423.

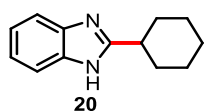

**20**  $R_f = 0.8$ , 100% EtOAc

Compound **20** was prepared following the general procedure (10 h) in 76% yield as colorless solid. **<sup>1</sup>H NMR** (400 MHz, CD<sub>3</sub>OD)  $\delta$  7.50-7.46 (m, 2H), 7.19-7.15 (m, 2H), 2.93-2.86 (m, 1H), 2.10-2.06 (m, 2H), 1.91-1.87 (m, 2H), 1.81-1.77 (m, 1H), 1.69-1.62 (m, 2H), 1.53-1.42 (m, 2H), 1.40-1.31 (m, 1H). Spectra data are consistent with those reported in the literature.<sup>14</sup>

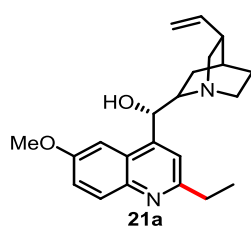

**21a**  $R_f = 0.4$ , 5% MeOH in DCM

Compound **21a** was prepared following the general procedure (24 h) in 81% yield as colorless solid. **<sup>1</sup>H NMR** (400 MHz, CDCl<sub>3</sub>)  $\delta$  7.90 (d,  $J = 9.2$  Hz, 1H), 7.41 (s, 1H), 7.25 (d,  $J = 2.3$  Hz, 1H), 7.14 (s, 1H), 5.75-5.67 (m, 1H), 5.54 (s, 1H), 4.97-4.90 (m, 2H), 3.84 (s, 3H), 3.54 (br s, 1H), 3.13-3.07 (m, 1H), 2.85 (q,  $J = 7.6$  Hz, 2H), 2.76-2.62 (m, 2H), 2.28 (br s, 1H), 1.81-1.68 (m, 3H), 1.56-1.43 (m, 3H), 1.29 (t,  $J = 7.6$  Hz, 3H); **<sup>13</sup>C NMR** (100 MHz, CDCl<sub>3</sub>)  $\delta$  161.01, 157.10, 147.62, 143.83, 141.62, 130.84, 124.81, 121.05, 118.01, 114.49, 101.27, 71.74, 59.92,

56.91, 55.62, 43.28, 39.83, 32.03, 27.85, 27.43, 21.43, 14.03; **HRMS** Calcd for C<sub>22</sub>H<sub>29</sub>N<sub>2</sub>O<sub>2</sub> [M+H<sup>+</sup>]: 353.2229, Found: 353.2228.

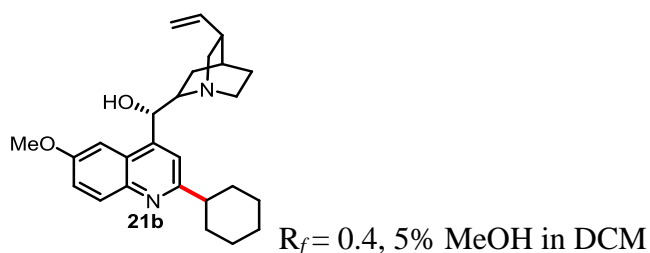

Compound **21b** was prepared following the general procedure (8 h) in 90% yield as colorless solid. **<sup>1</sup>H NMR** (400 MHz, CDCl<sub>3</sub>) δ 7.95 (d, *J* = 9.2 Hz, 1H), 7.49 (s, 1H), 7.30 (d, *J* = 9.2 Hz, 1H), 7.19 (s, 1H), 5.77-5.67 (m, 2H), 4.99-4.91 (m, 2H), 3.87 (s, 3H), 3.65-3.52 (m, 1H), 3.19-3.11 (m, 2H), 2.87-2.81 (m, 1H), 2.78-2.67 (m, 2H), 2.36-2.26 (m, 1H), 2.00-1.91 (m, 2H), 1.84-1.74 (m, 6H), 1.63-1.26 (m, 9H); **<sup>13</sup>C NMR** (100 MHz, CDCl<sub>3</sub>) δ 163.90, 157.18, 147.46, 143.74, 141.44, 131.06, 124.94, 120.99, 116.70, 114.60, 101.23, 71.63, 59.83, 56.86, 55.71, 47.29, 43.34, 39.74, 32.81, 27.87, 27.28, 26.46, 25.98, 20.92; **HRMS** Calcd for C<sub>26</sub>H<sub>35</sub>N<sub>2</sub>O<sub>2</sub> [M+H<sup>+</sup>]: 407.2699, Found: 407.2698.

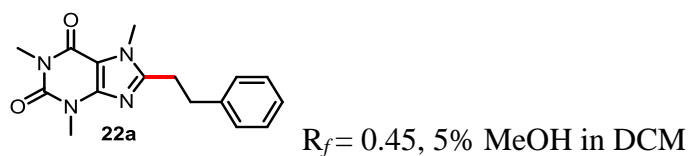

Compound **22a** was prepared following the general procedure (24 h) in 42% yield as colorless solid. **<sup>1</sup>H NMR** (400 MHz, CDCl<sub>3</sub>) δ 7.31-7.21 (m, 4H), 7.13 (d, *J* = 7.0 Hz, 2H), 3.61 (s, 3H), 3.60 (s, 3H), 3.39 (s, 3H), 3.11-3.08 (m, 2H), 3.04-3.00 (m, 2H); **<sup>13</sup>C NMR** (100 MHz, CDCl<sub>3</sub>) δ 155.26, 153.34, 151.67, 148.00, 139.97, 128.72, 128.31, 126.69, 107.15, 34.03, 31.39, 29.72, 28.95, 27.85; **HRMS** Calcd for C<sub>16</sub>H<sub>19</sub>N<sub>4</sub>O<sub>2</sub> [M+H<sup>+</sup>]: 299.1508, Found: 299.1508.

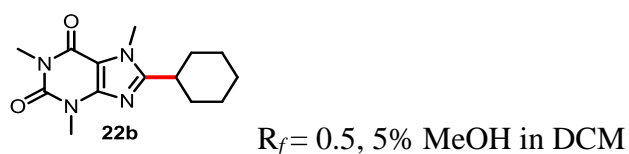

Compound **22b** was prepared following the general procedure (12 h) in 50% yield as colorless solid. **<sup>1</sup>H NMR** (400 MHz, CDCl<sub>3</sub>) δ 3.93 (s, 3H), 3.57 (s, 3H), 3.40 (s, 3H), 2.75-2.68 (m, 1H),

1.92-1.85 (m, 4H), 1.78-1.64 (m, 3H), 1.44-1.31 (m, 3H). Spectra data are consistent with those reported in the literature.<sup>14</sup>

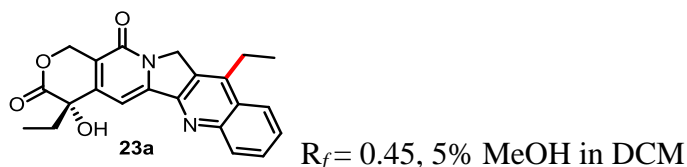

(*S*)-camptothecin **23-1** (69.6 mg, 0.2 mmol, 1.0 equiv), ethyl boronic acid **2c** (22.5 mg, 0.3 mmol, 1.5 equiv) and BI-OAc (122.4 mg, 0.4 mmol, 2.0 equiv) were added to a solution of Ru(bpy)<sub>3</sub>Cl<sub>2</sub> (1.28 mg, 0.002 mmol, 0.01 equiv) in HFIP (0.5 mL). The reaction vial was purged with Ar for 1 min and then the mixture was stirred at 30 °C under the fluorescent light irradiation for 48 h. The solvent was removed *in vacuo* and the residue was purified by preparative thin layer chromatography to afford compound **23a** as a light yellow solid (45.2 mg, 60% yield). <sup>1</sup>H NMR (400 MHz, CDCl<sub>3</sub>) δ 8.24 (d, *J* = 8.4 Hz, 1H), 8.14 (d, *J* = 8.4 Hz, 1H), 7.84-7.79 (m, 1H), 7.70-7.67 (m, 2H), 5.77 (d, *J* = 16.2 Hz, 1H), 5.32 (d, *J* = 16.2 Hz, 1H), 5.27 (s, 2H), 3.74 (s, 1H), 3.22 (q, *J* = 7.7 Hz, 2H), 1.96-1.84 (m, 2H), 1.42 (t, *J* = 7.7 Hz, 3H), 1.05 (t, *J* = 7.4 Hz, 3H). Spectra data are consistent with those reported in the literature.<sup>22</sup>

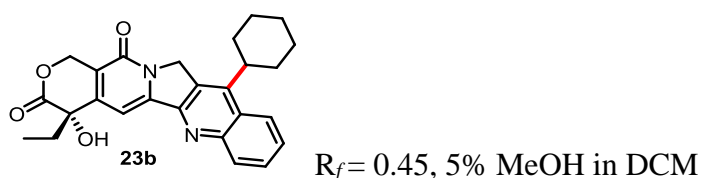

(*S*)-camptothecin **23-1** (69.6 mg, 0.2 mmol, 1.0 equiv), alkyl boronic acid **2q** (38.6 mg, 0.3 mmol, 1.5 equiv) and BI-OAc (122.4 mg, 0.4 mmol, 2.0 equiv) were added to a solution of Ru(bpy)<sub>3</sub>Cl<sub>2</sub> (1.28 mg, 0.002 mmol, 0.01 equiv) in HFIP (0.5 mL). The reaction vial was purged with Ar for 1 min and then the mixture was stirred at 30 °C under the fluorescent light irradiation for 5 h. The solvent was removed *in vacuo* and the residue was purified by preparative thin layer chromatography to afford compound **23b** as a light yellow solid (78.1 mg, 91% yield). <sup>1</sup>H NMR (400 MHz, CDCl<sub>3</sub>) δ 8.26-8.20 (m, 2H), 7.79 (t, *J* = 7.5 Hz, 1H), 7.69-7.04 (m, 2H), 5.76 (d, *J* = 16.2 Hz, 1H), 5.42 (s, 2H), 5.31 (d, *J* = 16.2 Hz, 1H), 3.81 (s,

1H), 3.66 (br s, 1H), 2.02-1.82 (m, 9H), 1.65-1.40 (m, 3H), 1.04 (t,  $J = 7.3$  Hz, 3H). Spectra data are consistent with those reported in the literature.<sup>23</sup>

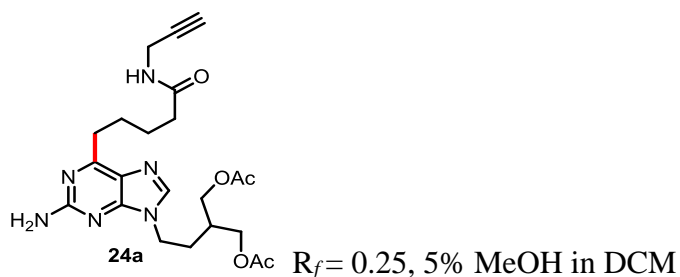

Compound **24a** was prepared following the general procedure (7 h) in 51% yield as colorless solid.  $^1\text{H NMR}$  (400 MHz,  $\text{CDCl}_3$ )  $\delta$  7.74 (s, 1H), 6.19 (br s, 1H), 5.00 (br s, 2H), 4.19 (t,  $J = 7.1$  Hz, 2H), 4.14 (d,  $J = 5.4$  Hz, 4H), 4.04 (dd,  $J = 5.1, 2.5$  Hz, 2H), 3.02 (t,  $J = 7.4$  Hz, 2H), 2.30 (t,  $J = 7.5$  Hz, 2H), 2.23 (t,  $J = 2.5$  Hz, 1H), 2.07 (s, 6H), 2.05-1.86 (m, 5H), 1.77-1.70 (m, 2H);  $^{13}\text{C NMR}$  (100 MHz,  $\text{CDCl}_3$ )  $\delta$  172.52, 170.90, 163.29, 159.63, 152.64, 140.80, 126.83, 79.87, 71.44, 63.62, 40.88, 35.92, 34.90, 32.31, 29.05, 28.78, 27.47, 25.11, 20.84; **HRMS** Calcd for  $\text{C}_{22}\text{H}_{31}\text{N}_6\text{O}_5$  [ $\text{M}+\text{H}^+$ ]: 459.2356, Found: 459.2355.

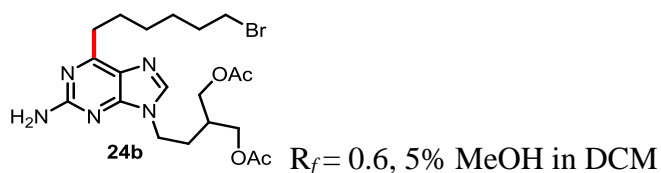

Compound **24b** was prepared following the general procedure (5 h) in 65% yield as light brown oil.  $^1\text{H NMR}$  (400 MHz,  $\text{CDCl}_3$ )  $\delta$  7.72 (s, 1H), 4.97 (br s, 2H), 4.19 (t,  $J = 7.1$  Hz, 2H), 4.14 (d,  $J = 5.4$  Hz, 4H), 3.39 (t,  $J = 6.9$  Hz, 2H), 2.99 (t,  $J = 7.8$  Hz, 2H), 2.07 (s, 6H), 2.04-1.92 (m, 3H), 1.89-1.81 (m, 4H), 1.53-1.40 (m, 4H);  $^{13}\text{C NMR}$  (100 MHz,  $\text{CDCl}_3$ )  $\delta$  170.84, 163.74, 159.58, 152.55, 140.61, 126.71, 63.59, 40.79, 34.83, 33.85, 33.11, 32.60, 28.79, 28.69, 28.24, 27.91, 20.80; **HRMS** Calcd for  $\text{C}_{20}\text{H}_{31}\text{BrN}_5\text{O}_4$  [ $\text{M}+\text{H}^+$ ]: 484.1559, Found: 484.1562.

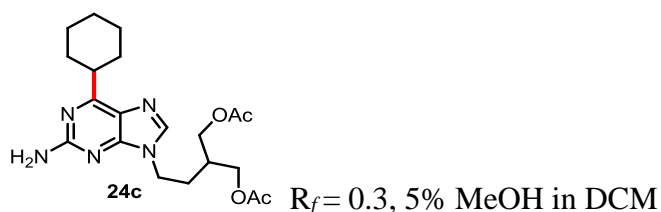

Compound **24c** was prepared following the general procedure (4 h) in 50% yield as colorless solid. **<sup>1</sup>H NMR** (400 MHz, CDCl<sub>3</sub>) δ 7.71 (s, 1H), 5.02 (br s, 2H), 4.18 (t, *J* = 7.1 Hz, 2H), 4.14 (d, *J* = 5.4 Hz, 4H), 3.26-3.18 (m, 1H), 2.06 (s, 6H), 2.03-1.75 (m, 10H), 1.50-1.34 (m, 3H); **<sup>13</sup>C NMR** (100 MHz, CDCl<sub>3</sub>) δ 170.83, 167.66, 159.71, 152.66, 140.21, 125.83, 63.62, 42.26, 40.73, 34.82, 31.06, 28.80, 26.22, 25.90, 20.79; **HRMS** Calcd for C<sub>20</sub>H<sub>30</sub>N<sub>5</sub>O<sub>4</sub> [M+H<sup>+</sup>]: 404.2298, Found: 404.2295.

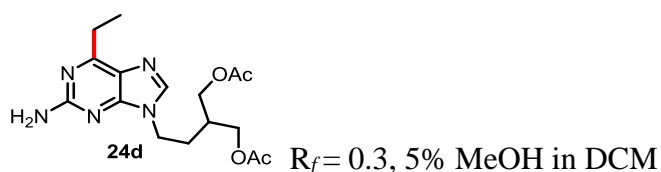

Compound **24d** was prepared following the general procedure (4 h) in 70% yield as colorless oil. **<sup>1</sup>H NMR** (400 MHz, CDCl<sub>3</sub>) δ 7.71 (s, 1H), 4.95 (s, 2H), 4.19 (t, *J* = 7.1 Hz, 2H), 4.14 (d, *J* = 5.3 Hz, 4H), 3.03 (q, *J* = 7.6 Hz, 2H), 2.06 (s, 6H), 2.02-1.90 (m, 3H), 1.39 (t, *J* = 7.6 Hz, 3H); **<sup>13</sup>C NMR** (100 MHz, CDCl<sub>3</sub>) δ 170.83, 164.98, 159.66, 152.56, 140.53, 126.37, 63.61, 40.78, 34.84, 28.80, 26.40, 20.78, 12.57; **HRMS** Calcd for C<sub>16</sub>H<sub>24</sub>N<sub>5</sub>O<sub>4</sub> [M+H<sup>+</sup>]: 350.1828, Found: 350.1825.

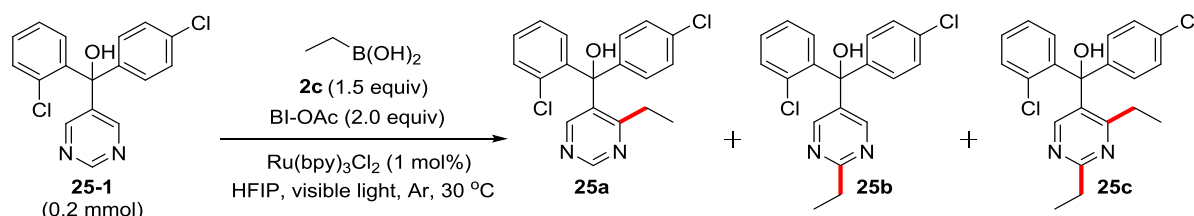

**Scheme S12.**

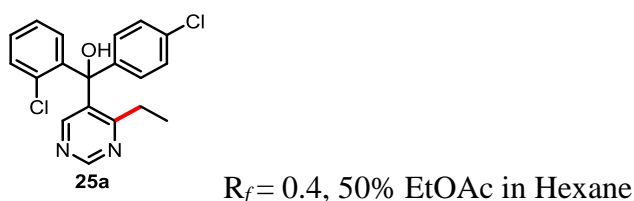

Compound **25a** was prepared following the general procedure (24 h) in 11% yield as colorless solid. **<sup>1</sup>H NMR** (400 MHz, CDCl<sub>3</sub>) δ 9.10 (s, 1H), 7.91 (s, 1H), 7.48 (dd, *J* = 7.9, 1.2 Hz, 1H), 7.38-7.34 (m, 3H), 7.21-7.17 (m, 3H), 6.67 (dd, *J* = 7.9, 1.5 Hz, 1H), 4.59 (s, 1H), 2.81-2.67 (m, 2H), 1.14 (t, *J* = 7.4 Hz, 3H); **<sup>13</sup>C NMR** (100 MHz, CDCl<sub>3</sub>) δ 172.45, 157.70, 155.83,

141.95, 141.10, 135.71, 134.26, 132.60, 131.95, 130.64, 130.04, 129.20, 128.67, 127.06, 81.23, 29.96, 12.70; **HRMS** Calcd for C<sub>19</sub>H<sub>17</sub>Cl<sub>2</sub>N<sub>2</sub>O [M+H<sup>+</sup>]: 359.0718, Found: 359.0719.

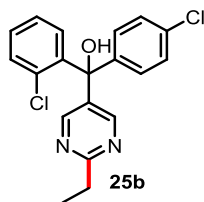

R<sub>f</sub> = 0.5, 50% EtOAc in Hexane

Compound **25b** was prepared following the general procedure (24 h) in 14% yield as colorless solid. **<sup>1</sup>H NMR** (400 MHz, CDCl<sub>3</sub>) δ 8.52 (s, 2H), 7.44 (dd, *J* = 7.9, 1.0 Hz, 1H), 7.35-7.31 (m, 3H), 7.22-7.18 (m, 3H), 6.76 (dd, *J* = 7.9, 1.4 Hz, 1H), 4.46 (s, 1H), 3.02 (q, *J* = 7.6 Hz, 2H), 1.38 (t, *J* = 7.6 Hz, 3H); **<sup>13</sup>C NMR** (100 MHz, CDCl<sub>3</sub>) δ 171.24, 156.37, 142.47, 141.34, 135.09, 134.10, 132.72, 131.82, 130.69, 130.06, 128.78, 128.65, 126.98, 79.77, 32.26, 12.43; **HRMS** Calcd for C<sub>19</sub>H<sub>17</sub>Cl<sub>2</sub>N<sub>2</sub>O [M+H<sup>+</sup>]: 359.0718, Found: 359.0719.

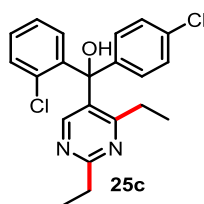

R<sub>f</sub> = 0.7, 50% EtOAc in Hexane

Compound **25c** was prepared following the general procedure (24 h) in 16% yield as colorless solid. **<sup>1</sup>H NMR** (400 MHz, CDCl<sub>3</sub>) δ 7.80 (s, 1H), 7.45 (dd, *J* = 7.9, 0.9 Hz, 1H), 7.36-7.30 (m, 3H), 7.19-7.16 (m, 3H), 6.69 (dd, *J* = 7.9, 1.3 Hz, 1H), 4.56 (s, 1H), 2.97 (q, *J* = 7.6 Hz, 2H), 2.69 (q, *J* = 7.4 Hz, 2H), 1.37 (t, *J* = 7.6 Hz, 3H), 1.12 (t, *J* = 7.4 Hz, 3H); **<sup>13</sup>C NMR** (100 MHz, CDCl<sub>3</sub>) δ 170.90, 156.12, 142.37, 141.39, 134.06, 132.65, 132.40, 131.85, 130.68, 129.86, 129.20, 128.55, 126.94, 81.21, 32.16, 30.00, 13.01, 12.41; **HRMS** Calcd for C<sub>21</sub>H<sub>21</sub>Cl<sub>2</sub>N<sub>2</sub>O [M+H<sup>+</sup>]: 387.1031, Found: 387.1028.

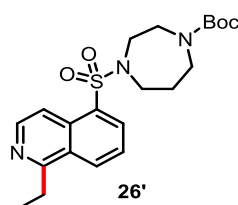

R<sub>f</sub> = 0.3, 50% EtOAc in Hexane

Fasudil (58.4 mg, 0.2 mmol, 1.0 equiv, prepared from commercial available fasudil hydrochloride by neutralization), ethyl boronic acids **2c** (24.5 mg, 0.3 mmol, 1.5 equiv) and BI-OAc (126.0 mg, 0.4 mmol, 2.0 equiv) were added to a solution of Ru(bpy)<sub>3</sub>Cl<sub>2</sub> (1.8 mg, 0.002 mmol, 0.01 equiv) in HFIP (0.5 mL). The reaction vial was purged with Ar for 1 min and then the mixture was stirred at 30 °C under the fluorescent light irradiation for 10 h. The solvent was removed *in vacuo* and the residue was dissolved in DCM (3 mL). To the solution was added K<sub>2</sub>CO<sub>3</sub> (approximate 300 mg), the mixture was vigorously stirred for 5 min. After that, the mixture was filtrated through a pad of Celite and washed with DCM. The filtrate was concentrated *in vacuo* and the residue was dissolved in DCM (5 mL). To the solution was added Boc<sub>2</sub>O (87.5 mg, 0.4 mmol, 2.0 equiv) and TEA (61.0 mg, 0.6 mmol, 3.0 equiv), then the mixture was stirred at room temperature for 2 h. The solvent was removed *in vacuo* and the residue was purified by flash chromatography on silica gel (ethyl acetate/petroleum ether = 50:50) to afford compound **26'** (51.2 mg, 61% for 2 steps) as a colorless oil. **<sup>1</sup>H NMR** (400 MHz, CD<sub>3</sub>OD) δ 8.62 (d, *J* = 8.5 Hz, 1H), 8.49 (d, *J* = 6.3 Hz, 1H), 8.40-8.35 (m, 3H), 7.84-7.80 (m, 1H), 3.55-3.38 (m, 10H), 1.90-1.85 (m, 2H), 1.44 (s, 9H), 1.42 (t, *J* = 8.4 Hz, 3H); **<sup>13</sup>C NMR** (100 MHz, CD<sub>3</sub>OD) δ 164.45, 155.50, 155.35, 141.80, 141.76, 135.27, 132.66, 132.33, 131.09, 127.30, 126.28, 116.59, 80.06, 79.93, 48.62, 48.36, 47.97, 47.94, , 47.02, 45.76, 45.45, 28.79, 28.63, 28.08, 27.27, 27.24, 13.11; **HRMS** Calcd for C<sub>17</sub>H<sub>22</sub>N<sub>3</sub>O<sub>4</sub>S [M-*t*-Bu+2H<sup>+</sup>]: 364.1331, Found: 364.1436.

## 7. Mechanism study

### 7.1 Synthesis of compound 27

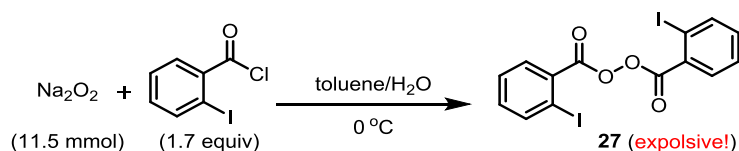

**Scheme S13.**

Compound **27** was prepared following a reported procedure<sup>24</sup>: to the solution of *o*-iodobenzoyl chloride (5.2 g, 19.5 mmol, 1.7 equiv) in toluene (5 mL) was added a solution of sodium peroxide (0.9 g, 11.5 mmol, 1.0 equiv) in ice-water (12 mL) dropwise at 0 °C. After addition completed, the mixture was stirred for 1 h at 0 °C. The precipitate was collected by filtration



and the solid product was quickly washed with water, methanol, sodium bicarbonate and again with water and methanol. The solid was then dissolved with chloroform at room temperature. To the clear solution was added cold methanol at 0 °C as soon as possible under stirring (**NOTE:** If the addition of the methanol was delayed, no compound **27** was obtained.) The precipitated peroxide was allowed to stand at 0 °C only until the mother liquor is clear. After filtration, compound **27** was obtained as a colorless crystals (1.3 g, 23%). Spectra data are consistent with those reported in the literature.<sup>24</sup> (**NOTE:** Compound **27** is explosive, all the operations above were performed behind a blast shield.)

## 7.2 Minisci C-H alkylation promoted by BPO

### 7.2.1 Minisci C-H alkylation with compound **2a** promoted by BPO

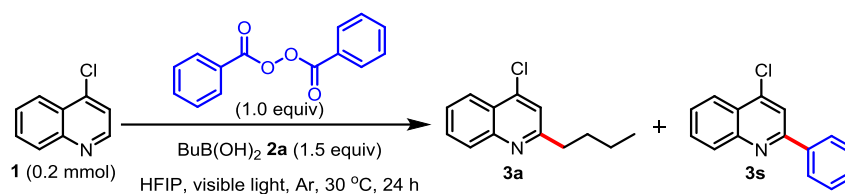

**Scheme S14.**

Compound **1** (32.8 mg, 0.2 mmol, 1.0 equiv), alkyl boronic acids **2a** (30.8 mg, 0.3 mmol, 1.5 equiv) and BPO (benzoyl peroxide, 48.6 mg, 0.2 mmol, 1.0 equiv) were added to HFIP (0.5 mL). The reaction vial was purged with Ar for 1 min and then the mixture was stirred at 30 °C under the fluorescent light irradiation for 24 h. The solvent was removed *in vacuo* and the residue was dissolved in DCM (3 mL). To the solution was added K<sub>2</sub>CO<sub>3</sub> (approximate 150 mg), the mixture was vigorously stirred for 5 min. Filtrated over a Celite plug and the residue was washed with DCM. The filtrate was concentrated *in vacuo* and the residue was purified by preparative thin layer chromatography to afford compound **3a** as a colorless oil in 20% yield. Compound **3s** was isolated in 11% yield (5.1 mg) as a colorless oil.

### 7.2.2 Minisci C-H alkylation with compound **2b** promoted by BPO

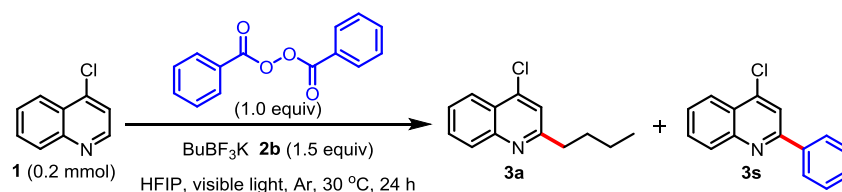

**Scheme S15.**

Compound **1** (32.8 mg, 0.2 mmol, 1.0 equiv), compound **2b** (48.6 mg, 0.3 mmol, 1.5 equiv) and BPO (benzoyl peroxide, 48.8 mg, 0.2 mmol, 1.0 equiv) were added to HFIP (0.5 mL). The reaction vial was purged with Ar for 1 min and then the mixture was stirred at 30 °C under the fluorescent light irradiation for 24 h. The solvent was removed *in vacuo* and the residue was dissolved in DCM (3 mL). To the solution was added K<sub>2</sub>CO<sub>3</sub> (approximate 150 mg), the mixture was vigorously stirred for 5 min. Filtrated over a Celite plug and the residue was washed with DCM. The filtrate was concentrated *in vacuo* and the residue was purified by preparative thin layer chromatography to afford compound **3a** as a colorless oil (~2.1 mg, ~5% yield). Compound **3s** was isolated in 7% yield (3.4 mg) as a colorless oil.

### 7.3 Minisci C-H alkylation promoted by compound 27

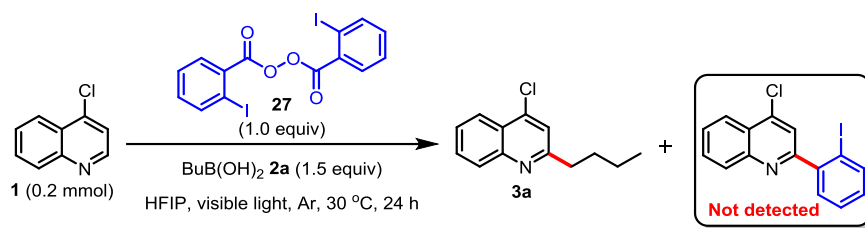

**Scheme S16.**

Compound **1** (32.8 mg, 0.2 mmol, 1.0 equiv), alkyl boronic acids **2a** (30.6 mg, 0.3 mmol, 1.5 equiv) and compound **27** (100.0 mg, 0.2 mmol, 1.0 equiv) were added to HFIP (0.5 mL). The reaction vial was purged with Ar for 1 min and then the mixture was stirred at 30 °C under the fluorescent light irradiation for 24 h. The solvent was removed *in vacuo* and the residue was dissolved in DCM (3 mL). To the solution was added K<sub>2</sub>CO<sub>3</sub> (approximate 150 mg), the mixture was vigorously stirred for 5 min. Filtrated over a Celite plug and the residue was washed with DCM. The filtrate was concentrated *in vacuo* and the residue was purified by preparative thin layer chromatography to afford compound **3a** as a colorless oil (16.7 mg, 38% yield). 16.1 mg of starting material compound **1** was recovered. Conversion based on recovered starting material compound **1**: 51%.

## 8. DFT calculations

### 8.1 Computational details

All DFT calculations were performed with the Gaussian 09 software package.<sup>25</sup> Geometries were optimized using the M06-2X functional and the 6-31+G(d) basis set in the gas phase.

Single point energies were calculated using M06-2X and 6-311++G(d,p) and the SMD solvation model in HFIP. Since the solvent parameters for HFIP are not available in Gaussian 09. The parameters of isopropanol were used and the dielectric constant of the solvent was modified to the dielectric constant of HFIP<sup>2</sup> ( $\epsilon = 16.7$ ) by using the “scrf=(smd,solvent=2-propanol,read)” keywords in the Gaussian 09 calculations. The reported Gibbs free energies and enthalpies include zero-point vibrational energies and thermal corrections computed at 298 K. All reported Gibbs free energies and enthalpies are corrected to the standard concentration in solution (1 mol/L).

The geometry of the key reaction intermediate, the *ortho*-iodobenzoyloxy radical **BI-2**, was also optimized using a few different levels of theories to evaluate the effects of density functional method, basis set, and solvation models on the weak intramolecular I···O interaction. The optimized I···O distance is highly dependent upon the choice of density functional, basis set. As expected, calculations without diffuse functions significantly overestimate the I···O distance (entries 1 and 4). B3LYP and  $\omega$ B97X-D also predict longer I···O distance than M06-2X when using the same basis set (entries 1, 9 versus 5). Interestingly, calculations using the 6-31+G(d) and 6-311++G(d,p) basis sets give almost identical results (entries 2 versus 3, 5 versus 6). Replacing the SDD basis set with the LANL2DZ basis set for iodine leads to slight decrease of the I···O distance (entries 7 and 8). Finally, using solvation model in the geometry optimization also noticeably decreases the I···O distance (entries 10-12).

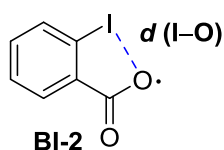

| entry | method for geometry optimization | $d(\text{I-O}) / \text{\AA}$ |
|-------|----------------------------------|------------------------------|
| 1     | B3LYP/6-31G(d)-SDD               | 2.81                         |
| 2     | B3LYP/6-31+G(d)-SDD              | 2.71                         |
| 3     | B3LYP/6-311++G(d,p)-SDD          | 2.71                         |
| 4     | M06-2X/6-31G(d)-SDD              | 2.78                         |
| 5     | M06-2X/6-31+G(d)-SDD             | 2.59                         |
| 6     | M06-2X/6-311++G(d,p)-SDD         | 2.59                         |
| 7     | M06-2X/6-31+G(d)-LANL2DZ         | 2.56                         |
| 8     | M06-2X/6-311++G(d,p)-LANL2DZ     | 2.56                         |

|    |                                    |      |
|----|------------------------------------|------|
| 9  | $\omega$ B97X-D/6-31+G(d)-SDD      | 2.68 |
| 10 | M06-2X/6-31G(d)-SDD/SMD(HFIP)      | 2.50 |
| 11 | M06-2X/6-31+G(d)-SDD/SMD(HFIP)     | 2.47 |
| 12 | M06-2X/6-311++G(d,p)-SDD/SMD(HFIP) | 2.48 |

**Table S2. Geometry of BI-2 optimized at different levels of theories.**

## 8.2 The reaction energy of the one electron reduction of BI-OAc using the excited state $\text{Ru(II)}^*(\text{bpy})_3^{2+}$

The photoexcited  $\text{Ru(II)}^*(\text{bpy})_3^{2+}$  is a potent reductant with an experimental standard reduction potential (SRP) of  $-0.81$  V vs. SCE in MeCN.<sup>26</sup> Thus, the absolute SRP in MeCN can be calculated as follows.<sup>27</sup>

$$E_{\text{Ru(bpy)}_3^{3+/2+}}^{\ominus,\text{abs}} = E_{\text{Ru(bpy)}_3^{3+/2+}}^{\ominus,\text{SCE}} + 4.429\text{V} = -0.81\text{V} + 4.429\text{V} = 3.62\text{V}$$

Since

$$\Delta G = -nFE$$

where  $n$  is the number of electron transferred (one),  $F$  is the Faraday constant, the Gibbs free energy of the following reduction half reaction is

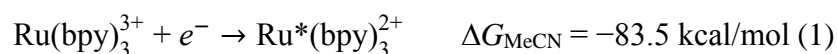

The reaction Gibbs free energies of the following reduction half reactions are calculated using the DFT-computed Gibbs free energy in HFIP solution (see Computational Details) and the Gibbs free energy of electron ( $-0.867$  kcal/mol).<sup>28</sup>

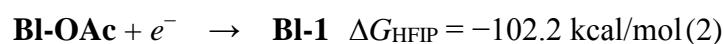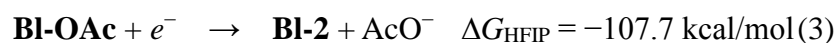

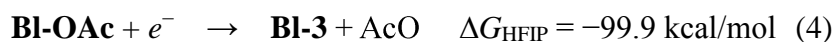

The reaction energies of the SET reactions (eq. 5-7) can be calculated from equations 1-4. Since the experimental reduction potential of  $\text{Ru}(\text{bpy})_3^{3+}/\text{Ru}^*(\text{bpy})_3^{2+}$  in HFIP is not available, the reduction half reaction energy in MeCN (eq. 1) was used in the calculations.

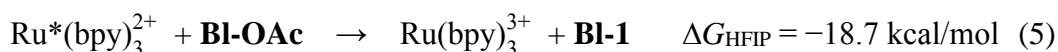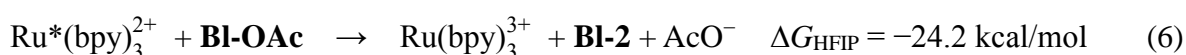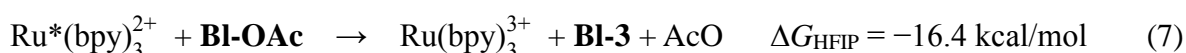

### 8.3 Cartesian coordinates and energies of optimized structures

#### BI-OAc

M06-2X/6-31+G(d) SCF energy: -659.12988545 a.u.

M06-2X/6-31+G(d) enthalpy: -658.968934 a.u.

M06-2X/6-31+G(d) free energy: -659.025297 a.u.

M06-2X/6-311++G(d,p) SCF energy in solution: -659.33123735 a.u.

M06-2X/6-311++G(d,p) enthalpy: -659.170286 a.u.

M06-2X/6-311++G(d,p) free energy: -659.226649 a.u.

#### Cartesian coordinates

| ATOM | X         | Y         | Z         |
|------|-----------|-----------|-----------|
| C    | -2.186805 | 0.120762  | -0.000647 |
| C    | -0.927377 | 0.691416  | 0.000044  |
| C    | -0.698798 | 2.057019  | 0.001759  |
| C    | -1.826774 | 2.881309  | 0.002990  |
| C    | -3.114640 | 2.340859  | 0.002362  |
| C    | -3.298844 | 0.961995  | 0.000464  |
| C    | -2.323585 | -1.378609 | -0.002036 |
| H    | 0.305464  | 2.462057  | 0.002153  |
| H    | -1.690132 | 3.958426  | 0.004523  |

|   |           |           |           |
|---|-----------|-----------|-----------|
| H | -3.975843 | 3.001240  | 0.003419  |
| H | -4.285923 | 0.508927  | -0.000044 |
| O | -1.157565 | -2.004279 | -0.001678 |
| O | -3.396361 | -1.933395 | -0.003267 |
| I | 0.590771  | -0.805851 | -0.000220 |
| O | 1.938123  | 0.857653  | -0.001870 |
| C | 3.192014  | 0.434703  | 0.004572  |
| O | 3.474299  | -0.751826 | 0.013357  |
| C | 4.206736  | 1.549693  | -0.009164 |
| H | 4.115226  | 2.109978  | -0.943825 |
| H | 4.012274  | 2.239723  | 0.815499  |
| H | 5.208559  | 1.129629  | 0.075526  |

### BI-1

M06-2X/6-31+G(d) SCF energy: -659.22774316 a.u.

M06-2X/6-31+G(d) enthalpy: -659.068338 a.u.

M06-2X/6-31+G(d) free energy: -659.128858 a.u.

M06-2X/6-311++G(d,p) SCF energy in solution: -659.48981655 a.u.

M06-2X/6-311++G(d,p) enthalpy: -659.330411 a.u.

M06-2X/6-311++G(d,p) free energy: -659.390931 a.u.

### Cartesian coordinates

| ATOM | X         | Y         | Z         |
|------|-----------|-----------|-----------|
| C    | 2.292165  | 0.239393  | -0.000132 |
| C    | 0.955654  | 0.617448  | -0.000059 |
| C    | 0.550822  | 1.950195  | -0.000076 |
| C    | 1.534851  | 2.937929  | -0.000167 |
| C    | 2.887448  | 2.590254  | -0.000242 |
| C    | 3.257938  | 1.249699  | -0.000224 |
| C    | 2.734746  | -1.226952 | -0.000112 |
| H    | -0.506314 | 2.196755  | -0.000018 |
| H    | 1.237647  | 3.983572  | -0.000179 |
| H    | 3.649032  | 3.366114  | -0.000314 |

|   |           |           |           |
|---|-----------|-----------|-----------|
| H | 4.298181  | 0.936896  | -0.000278 |
| O | 1.785153  | -2.074538 | 0.000043  |
| O | 3.948227  | -1.458906 | -0.000238 |
| I | -0.534303 | -0.905164 | 0.000092  |
| O | -2.374768 | 1.069516  | 0.000119  |
| C | -3.449737 | 0.382201  | 0.000112  |
| O | -3.535200 | -0.856580 | 0.000089  |
| C | -4.736464 | 1.218898  | 0.000130  |
| H | -4.749433 | 1.865555  | 0.882798  |
| H | -4.749428 | 1.865606  | -0.882501 |
| H | -5.613442 | 0.568872  | 0.000109  |

## BI-2

M06-2X/6-31+G(d) SCF energy: -430.74156239 a.u.

M06-2X/6-31+G(d) enthalpy: -430.639153 a.u.

M06-2X/6-31+G(d) free energy: -430.684410 a.u.

M06-2X/6-311++G(d,p) SCF energy in solution: -659.48981655 a.u.

M06-2X/6-311++G(d,p) enthalpy: -659.387407 a.u.

M06-2X/6-311++G(d,p) free energy: -659.432664 a.u.

## Cartesian coordinates

| ATOM | X        | Y         | Z         |
|------|----------|-----------|-----------|
| C    | 1.261548 | 0.516621  | -0.000005 |
| C    | 0.459383 | -0.617658 | -0.000047 |
| C    | 0.995309 | -1.899331 | 0.000029  |
| C    | 2.382684 | -2.039015 | 0.000175  |
| C    | 3.208614 | -0.914240 | 0.000272  |
| C    | 2.648845 | 0.358264  | 0.000190  |
| C    | 0.700006 | 1.909792  | -0.000153 |
| H    | 0.352160 | -2.773122 | 0.000015  |
| H    | 2.814777 | -3.035214 | 0.000251  |
| H    | 4.287237 | -1.033062 | 0.000405  |
| H    | 3.260865 | 1.255478  | 0.000238  |

|   |           |           |           |
|---|-----------|-----------|-----------|
| O | -0.606247 | 2.036954  | -0.000780 |
| O | 1.410723  | 2.897249  | 0.000386  |
| I | -1.643192 | -0.335364 | -0.000010 |

### BI-3

M06-2X/6-31+G(d) SCF energy: -430.87638502 a.u.  
M06-2X/6-31+G(d) enthalpy: -430.774583 a.u.  
M06-2X/6-31+G(d) free energy: -430.820810 a.u.  
M06-2X/6-311++G(d,p) SCF energy in solution: -431.07893180 a.u.  
M06-2X/6-311++G(d,p) enthalpy: -430.977130 a.u.  
M06-2X/6-311++G(d,p) free energy: -431.023357 a.u.

### Cartesian coordinates

| ATOM | X         | Y         | Z         |
|------|-----------|-----------|-----------|
| C    | 1.343638  | 0.381596  | -0.000009 |
| C    | 0.337462  | -0.583752 | 0.000027  |
| C    | 0.625294  | -1.953013 | 0.000056  |
| C    | 1.946294  | -2.388786 | 0.000026  |
| C    | 2.975961  | -1.448051 | -0.000041 |
| C    | 2.665427  | -0.093633 | -0.000051 |
| C    | 1.162498  | 1.943047  | 0.000013  |
| H    | -0.185769 | -2.674862 | 0.000114  |
| H    | 2.161700  | -3.454732 | 0.000047  |
| H    | 4.014485  | -1.771223 | -0.000093 |
| H    | 3.437745  | 0.669957  | -0.000084 |
| O    | -0.012577 | 2.350335  | 0.000006  |
| O    | 2.237323  | 2.579354  | 0.000039  |
| I    | -1.765388 | -0.138700 | -0.000009 |

### AcO-

M06-2X/6-31+G(d) SCF energy: -228.43236595 a.u.  
M06-2X/6-31+G(d) enthalpy: -228.378045 a.u.  
M06-2X/6-31+G(d) free energy: -228.411558 a.u.



M06-2X/6-311++G(d,p) SCF energy in solution: -228.60628795 a.u.

M06-2X/6-311++G(d,p) enthalpy: -228.551967 a.u.

M06-2X/6-311++G(d,p) free energy: -228.585480 a.u.

#### Cartesian coordinates

| ATOM | X         | Y         | Z         |
|------|-----------|-----------|-----------|
| C    | -1.347532 | -0.051596 | -0.000001 |
| H    | -1.729639 | 0.476278  | 0.882045  |
| H    | -1.729649 | 0.476376  | -0.881983 |
| C    | 0.209652  | 0.001190  | -0.000002 |
| O    | 0.802793  | -1.103892 | 0.000000  |
| O    | 0.697592  | 1.157847  | 0.000000  |
| H    | -1.716512 | -1.081858 | -0.000052 |

#### AcO radical

M06-2X/6-31+G(d) SCF energy: -228.30816108 a.u.

M06-2X/6-31+G(d) enthalpy: -228.254162 a.u.

M06-2X/6-31+G(d) free energy: -228.288393 a.u.

M06-2X/6-311++G(d,p) SCF energy in solution: -228.38359529 a.u.

M06-2X/6-311++G(d,p) enthalpy: -228.329596 a.u.

M06-2X/6-311++G(d,p) free energy: -228.363827 a.u.

#### Cartesian coordinates

| ATOM | X         | Y         | Z         |
|------|-----------|-----------|-----------|
| C    | -1.353003 | -0.104275 | -0.001640 |
| H    | -1.685989 | -0.335956 | 1.013724  |
| H    | -1.790422 | 0.846417  | -0.314459 |
| C    | 0.154364  | -0.062290 | -0.006706 |
| O    | 0.910535  | -1.003143 | 0.001711  |
| O    | 0.631980  | 1.177475  | 0.000993  |
| H    | -1.671876 | -0.905726 | -0.670817 |

#### BzO radical

M06-2X/6-31+G(d) SCF energy: -419.97383060 a.u.  
M06-2X/6-31+G(d) enthalpy: -419.862909 a.u.  
M06-2X/6-31+G(d) free energy: -419.904056 a.u.  
M06-2X/6-311++G(d,p) SCF energy in solution: -420.09336129 a.u.  
M06-2X/6-311++G(d,p) enthalpy: -419.982440 a.u.  
M06-2X/6-311++G(d,p) free energy: -420.023587 a.u.

#### Cartesian coordinates

| ATOM | X         | Y         | Z         |
|------|-----------|-----------|-----------|
| C    | -1.833234 | -1.210020 | 0.000249  |
| C    | -0.442239 | -1.222506 | 0.000257  |
| C    | 0.252718  | -0.011936 | -0.000018 |
| C    | -0.428048 | 1.207680  | -0.000306 |
| C    | -1.819831 | 1.212859  | -0.000315 |
| C    | -2.519219 | 0.005659  | -0.000034 |
| H    | -2.383836 | -2.145467 | 0.000467  |
| H    | 0.117705  | -2.152981 | 0.000471  |
| H    | -2.358461 | 2.155184  | -0.000552 |
| H    | -3.605222 | 0.012262  | -0.000034 |
| C    | 1.734670  | -0.058667 | 0.000032  |
| O    | 2.435591  | -1.050045 | -0.000005 |
| O    | 2.368883  | 1.106193  | 0.000130  |
| H    | 0.125123  | 2.143400  | -0.000542 |

#### Ph radical

M06-2X/6-31+G(d) SCF energy: -231.45729696 a.u.  
M06-2X/6-31+G(d) enthalpy: -231.363600 a.u.  
M06-2X/6-31+G(d) free energy: -231.396927 a.u.  
M06-2X/6-311++G(d,p) SCF energy in solution: -231.52000248 a.u.  
M06-2X/6-311++G(d,p) enthalpy: -231.426306 a.u.  
M06-2X/6-311++G(d,p) free energy: -231.459633 a.u.

#### Cartesian coordinates

| ATOM | X         | Y         | Z         |
|------|-----------|-----------|-----------|
| C    | -1.223860 | -0.769470 | 0.000127  |
| C    | -0.000018 | -1.400238 | 0.000085  |
| C    | 1.224016  | -0.769268 | -0.000243 |
| C    | 1.212335  | 0.631345  | 0.000121  |
| C    | -0.000156 | 1.322902  | -0.000004 |
| C    | -1.212302 | 0.631388  | -0.000169 |
| H    | -2.158310 | -1.322692 | 0.000058  |
| H    | -0.000053 | 2.408699  | 0.000167  |
| H    | -2.151432 | 1.178126  | -0.000029 |
| H    | 2.151258  | 1.178331  | 0.000202  |
| H    | 2.158445  | -1.322422 | 0.000106  |

## 28

M06-2X/6-31+G(d) SCF energy: -242.22393023 a.u.

M06-2X/6-31+G(d) enthalpy: -242.139205 a.u.

M06-2X/6-31+G(d) free energy: -242.178367 a.u.

M06-2X/6-311++G(d,p) SCF energy in solution: -231.52000248 a.u.

M06-2X/6-311++G(d,p) enthalpy: 0.000000 a.u.

M06-2X/6-311++G(d,p) free energy: 0.000000 a.u.

### Cartesian coordinates

| ATOM | X         | Y         | Z         |
|------|-----------|-----------|-----------|
| C    | -2.645211 | -1.269303 | 0.000000  |
| C    | -1.271348 | -1.172315 | 0.000000  |
| C    | -0.569594 | 0.000607  | 0.000001  |
| C    | -1.284613 | 1.201078  | 0.000001  |
| C    | -2.679794 | 1.154193  | 0.000000  |
| C    | -3.359334 | -0.065173 | 0.000000  |
| H    | -3.153922 | -2.228532 | -0.000001 |
| H    | -3.240120 | 2.084082  | -0.000001 |
| H    | -4.445334 | -0.082819 | -0.000001 |
| H    | -0.761876 | 2.153180  | -0.000001 |

I            1.555861    -0.019253    0.000000

### **CO<sub>2</sub>**

M06-2X/6-31+G(d) SCF energy:    -188.51469500 a.u.

M06-2X/6-31+G(d) enthalpy:    -188.499178 a.u.

M06-2X/6-31+G(d) free energy:    -188.523423 a.u.

M06-2X/6-311++G(d,p) SCF energy in solution:    -188.57200890 a.u.

M06-2X/6-311++G(d,p) enthalpy:    -188.556492 a.u.

M06-2X/6-311++G(d,p) free energy:    -188.580737 a.u.

### Cartesian coordinates

| ATOM | X        | Y        | Z         |
|------|----------|----------|-----------|
| C    | 0.000000 | 0.000000 | 0.000000  |
| O    | 0.000000 | 0.000000 | 1.163071  |
| O    | 0.000000 | 0.000000 | -1.163071 |

### **BuB(OH)<sub>2</sub>**

M06-2X/6-31+G(d) SCF energy:    -334.31712425 a.u.

M06-2X/6-31+G(d) enthalpy:    -334.148920 a.u.

M06-2X/6-31+G(d) free energy:    -334.192915 a.u.

M06-2X/6-311++G(d,p) SCF energy in solution:    -334.44056789 a.u.

M06-2X/6-311++G(d,p) enthalpy:    -334.272364 a.u.

M06-2X/6-311++G(d,p) free energy:    -334.316359 a.u.

### Cartesian coordinates

| ATOM | X         | Y         | Z         |
|------|-----------|-----------|-----------|
| C    | -2.173103 | -0.572452 | -0.000387 |
| H    | -2.211836 | -1.230077 | -0.879756 |
| H    | -2.211822 | -1.231304 | 0.878062  |
| C    | -0.848326 | 0.188145  | 0.000155  |
| H    | -0.806721 | 0.850683  | -0.874427 |
| H    | -0.807007 | 0.849916  | 0.875341  |
| C    | 0.376504  | -0.731075 | -0.000109 |

|   |           |           |           |
|---|-----------|-----------|-----------|
| H | 0.333232  | -1.401439 | 0.873193  |
| H | 0.333140  | -1.400880 | -0.873839 |
| B | 1.765279  | 0.022714  | -0.000009 |
| O | 1.797506  | 1.386853  | -0.000218 |
| H | 2.704750  | 1.725556  | -0.000146 |
| O | 2.977231  | -0.629947 | 0.000254  |
| H | 2.902412  | -1.592263 | 0.000349  |
| C | -3.384664 | 0.357659  | 0.000277  |
| H | -3.378880 | 1.005767  | -0.883286 |
| H | -4.324976 | -0.202720 | -0.000292 |
| H | -3.379052 | 1.004273  | 0.884935  |

### TS-1

M06-2X/6-31+G(d) SCF energy: -765.05578593 a.u.

M06-2X/6-31+G(d) enthalpy: -764.785473 a.u.

M06-2X/6-31+G(d) free energy: -764.852915 a.u.

M06-2X/6-311++G(d,p) SCF energy in solution: -765.30591138 a.u.

M06-2X/6-311++G(d,p) enthalpy: -765.035598 a.u.

M06-2X/6-311++G(d,p) free energy: -765.103040 a.u.

Imaginary frequency: -270.7239 cm<sup>-1</sup>

### Cartesian coordinates

| ATOM | X         | Y         | Z         |
|------|-----------|-----------|-----------|
| C    | -4.059280 | 1.895144  | -0.258200 |
| C    | -3.546927 | 0.608836  | -0.424762 |
| C    | -2.189456 | 0.402334  | -0.212224 |
| C    | -1.335022 | 1.436375  | 0.155893  |
| C    | -1.867827 | 2.716999  | 0.323198  |
| C    | -3.222943 | 2.946961  | 0.116041  |
| H    | -5.118339 | 2.069864  | -0.421713 |
| H    | -4.198990 | -0.210060 | -0.711152 |
| H    | -1.190642 | 3.512487  | 0.619633  |
| H    | -3.630225 | 3.944273  | 0.246340  |

|   |           |           |           |
|---|-----------|-----------|-----------|
| C | 0.134423  | 1.235192  | 0.397933  |
| O | 0.846437  | 2.112622  | 0.824396  |
| O | 0.570769  | 0.022003  | 0.061058  |
| B | 1.590015  | -0.938544 | 1.026843  |
| C | 2.993866  | -0.110049 | 0.990802  |
| H | 2.871416  | 0.768727  | 1.633234  |
| H | 3.714395  | -0.779943 | 1.485830  |
| C | 3.514943  | 0.309803  | -0.379064 |
| H | 3.553339  | -0.552039 | -1.066863 |
| H | 2.817383  | 1.028664  | -0.828764 |
| C | 4.908894  | 0.937814  | -0.321559 |
| H | 5.613382  | 0.217085  | 0.114839  |
| H | 4.879965  | 1.795627  | 0.362811  |
| O | 0.954855  | -0.990809 | 2.282713  |
| H | 0.608428  | -1.876599 | 2.455218  |
| O | 1.539234  | -2.183283 | 0.325745  |
| H | 2.140256  | -2.205784 | -0.430562 |
| I | -1.365305 | -1.543545 | -0.425871 |
| C | 5.411114  | 1.386998  | -1.692519 |
| H | 6.408965  | 1.833414  | -1.630809 |
| H | 5.464686  | 0.540189  | -2.386918 |
| H | 4.736025  | 2.132024  | -2.128674 |

## 29

M06-2X/6-31+G(d) SCF energy: -607.41390059 a.u.

M06-2X/6-31+G(d) enthalpy: -607.270208 a.u.

M06-2X/6-31+G(d) free energy: -607.325398 a.u.

M06-2X/6-311++G(d,p) SCF energy in solution: -607.60702977 a.u.

M06-2X/6-311++G(d,p) enthalpy: -607.463337 a.u.

M06-2X/6-311++G(d,p) free energy: -607.518527 a.u.

Cartesian coordinates

| ATOM | X | Y | Z |
|------|---|---|---|
|------|---|---|---|

|   |           |           |           |
|---|-----------|-----------|-----------|
| C | -3.304999 | 1.495311  | -0.447941 |
| C | -2.675995 | 0.255999  | -0.362228 |
| C | -1.310459 | 0.176803  | -0.087168 |
| C | -0.563757 | 1.345231  | 0.109006  |
| C | -1.222778 | 2.580751  | 0.047517  |
| C | -2.578912 | 2.664415  | -0.235775 |
| H | -4.366720 | 1.537959  | -0.671804 |
| H | -3.251524 | -0.652643 | -0.504594 |
| H | -0.632648 | 3.474230  | 0.226215  |
| H | -3.064602 | 3.633308  | -0.290619 |
| C | 0.908725  | 1.440816  | 0.380080  |
| O | 1.402878  | 2.346200  | 0.996757  |
| I | -0.550985 | -1.808729 | 0.129771  |
| O | 1.608222  | 0.424082  | -0.159474 |
| B | 2.997073  | 0.350287  | -0.297630 |
| O | 3.764717  | 1.461439  | -0.342097 |
| H | 4.697815  | 1.249525  | -0.482148 |
| O | 3.531690  | -0.893507 | -0.454789 |
| H | 2.863536  | -1.592814 | -0.410895 |

### **n-butyl radical**

M06-2X/6-31+G(d) SCF energy: -157.68966288 a.u.

M06-2X/6-31+G(d) enthalpy: -157.564109 a.u.

M06-2X/6-31+G(d) free energy: -157.599579 a.u.

M06-2X/6-311++G(d,p) SCF energy in solution: -157.73738981 a.u.

M06-2X/6-311++G(d,p) enthalpy: -157.611836 a.u.

M06-2X/6-311++G(d,p) free energy: -157.647306 a.u.

### Cartesian coordinates

| ATOM | X         | Y        | Z         |
|------|-----------|----------|-----------|
| C    | -0.503443 | 0.523498 | -0.070447 |
| H    | -0.392725 | 1.268630 | 0.728414  |

|   |           |           |           |
|---|-----------|-----------|-----------|
| H | -0.407185 | 1.067497  | -1.018313 |
| C | 0.636519  | -0.493999 | 0.037510  |
| H | 0.510920  | -1.056713 | 0.980751  |
| H | 0.537711  | -1.241700 | -0.761714 |
| C | 1.987876  | 0.132763  | -0.014419 |
| H | 2.859889  | -0.435585 | -0.315515 |
| H | 2.151057  | 1.110746  | 0.426803  |
| C | -1.880258 | -0.129869 | 0.019243  |
| H | -2.682016 | 0.610265  | -0.064437 |
| H | -2.017661 | -0.864917 | -0.781809 |
| H | -2.004150 | -0.652581 | 0.974496  |



## 9. References

- [1] M. Victoria, J. Waser, *Org. Lett.* **2013**, *15*, 3246.
- [2] P. Eisenberger, S. Gischig, A. Togni, *Chem. Eur. J.* **2006**, *12*, 2579.
- [3] V. Matousek, E. Pietrasiak, R. Schwenk, A. Togni, *J. Org. Chem.* **2013**, *78*, 6763.
- [4] Z.-D. Shi, B.-H. Yang, Y.-L. Wu, *Tetrahedron* **2002**, *58*, 3287.
- [5] S. Ogi, K. Sugiyasu, M. Takeuchi, *Bull. Chem. Soc. Jpn.* **2011**, *84*, 40.
- [6] J. Xu, Y. Fu, D.-F. Luo, Y.-Y. Jiang, B. Xiao, Z.-J. Liu, T.-J. Gong, L. Liu, *J. Am. Chem. Soc.* **2011**, *133*, 15300.
- [7] L. R. Odell, J. Lindh, T. Gustafsson, M. Larhed, *Eur. J. Org. Chem.* **2010**, 2270.
- [8] H. Huang, G. Zhang, L. Gong, S. Zhang, Y. Chen, *J. Am. Chem. Soc.* **2014**, *136*, 2280.
- [9] J. Xu, B. Xiao, C.-Q. Xie, D.-F. Luo, L. Liu, Y. Fu, *Angew. Chem. Int. Ed.* **2012**, *51*, 12551.
- [10] R. Nandhakumar, T. Suresh, A. L. C. Jude, V. R. Kannan, P. S. Mohan, *Eur. J. Med. Chem.* **2007**, *42*, 1128.
- [11] G. E. Tumambac, C. Wolf, *J. Org. Chem.* **2004**, *69*, 2048.
- [12] G. A. Molander, V. Colombel, V. A. Braz, *Org. Lett.* **2011**, *13*, 1852.
- [13] J.-Y. Tsai, C.-S. Chang, Y.-F. Huang, H.-S. Chen, S.-K. Lin, F. F. Wong, L.-J. Huang, S.-C. Kuo, *Tetrahedron* **2008**, *64*, 11751.
- [14] A. P. Antonchick, L. Burgmann, *Angew. Chem. Int. Ed.* **2013**, *52*, 3267.
- [15] A. Sugimori, T. Yamada, H. Ishida, M. Nose, K. Terashima, N. Oohata, *Bull. Chem. Soc. Jpn.* **1986**, *59*, 3905.
- [16] R. Xia, M.-S. Xie, H.-Y. Niu, G.-R. Qu, H.-M. Guo, *Org. Lett.* **2014**, *16*, 444.
- [17] X. Fan, Y. Wang, Y. He, X. Zhang, J. Wang, *Tetrahedron Lett.* **2010**, *51*, 3493.
- [18] H.-J. Lim, D. Myung, I. Y. C. Lee, M. H. Jung, *J. Comb. Chem.* **2008**, *10*, 501.
- [19] A. Shaabani, A. Maleki, *Chem. Pharm. Bull.* **2008**, *56*, 79.
- [20] J. G. Samaritoni, *Org. Prep. Proced. Int.* **1988**, *20*, 117.
- [21] Y. Zhang, M. R. Sheets, E. K. Raja, K. N. Boblak, D. A. Klumpp, *J. Am. Chem. Soc.* **2011**, *133*, 8467.
- [22] X. Wang, X. Wu, N. Cheng, H. Zhao, Z. Gu, S. Xiang, *Synthetic Commun.* **2007**, *37*, 519.
- [23] M. Li, W. Jin, C. Jiang, C. Zheng, W. Tang, T. You, L. Lou, *Bioorg. Med. Chem. Lett.* **2009**,

19, 4107.

- [24] J. E. Leffler, R. D. Faulkner, C. C. Petropoulos, *J. Am. Chem. Soc.* **1958**, *80*, 5435.
- [25] Gaussian 09, Revision D.01, M. J. Frisch, G. W. Trucks, H. B. Schlegel, G. E. Scuseria, M. A. Robb, J. R. Cheeseman, G. Scalmani, V. Barone, B. Mennucci, G. A. Petersson, H. Nakatsuji, M. Caricato, X. Li, H. P. Hratchian, A. F. Izmaylov, J. Bloino, G. Zheng, J. L. Sonnenberg, M. Hada, M. Ehara, K. Toyota, R. Fukuda, J. Hasegawa, M. Ishida, T. Nakajima, Y. Honda, O. Kitao, H. Nakai, T. Vreven, J. A. Montgomery, Jr., J. E. Peralta, F. Ogliaro, M. Bearpark, J. J. Heyd, E. Brothers, K. N. Kudin, V. N. Staroverov, R. Kobayashi, J. Normand, K. Raghavachari, A. Rendell, J. C. Burant, S. S. Iyengar, J. Tomasi, M. Cossi, N. Rega, J. M. Millam, M. Klene, J. E. Knox, J. B. Cross, V. Bakken, C. Adamo, J. Jaramillo, R. Gomperts, R. E. Stratmann, O. Yazyev, A. J. Austin, R. Cammi, C. Pomelli, J. W. Ochterski, R. L. Martin, K. Morokuma, V. G. Zakrzewski, G. A. Voth, P. Salvador, J. J. Dannenberg, S. Dapprich, A. D. Daniels, Ö. Farkas, J. B. Foresman, J. V. Ortiz, J. Cioslowski, and D. J. Fox, Gaussian, Inc., Wallingford CT, 2009. <sup>2</sup> Hand book of Chemistry and Physics. 90<sup>th</sup> edition, David R. Lide, CRC Press, **2009-2010**.
- [26] C. R. Bock, T. J. Meyer, D. G. Whitten, *J. Am. Chem. Soc.*, **1975**, *97*, 2909.
- [27] A. A. Isse, A. Gennaro, *J. Phys. Chem. B* **2010**, *114*, 7894.
- [28] (a) J. E. Bartmess *J. Phys. Chem.* **1994**, *98*, 6420–6424. (b) J. E. Bartmess *J. Phys. Chem.* **1995**, *99*, 6755.

# 10. <sup>1</sup>H-NMR and <sup>13</sup>C-NMR spectra

gzw02-85-H  
PROTON

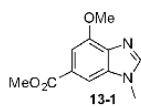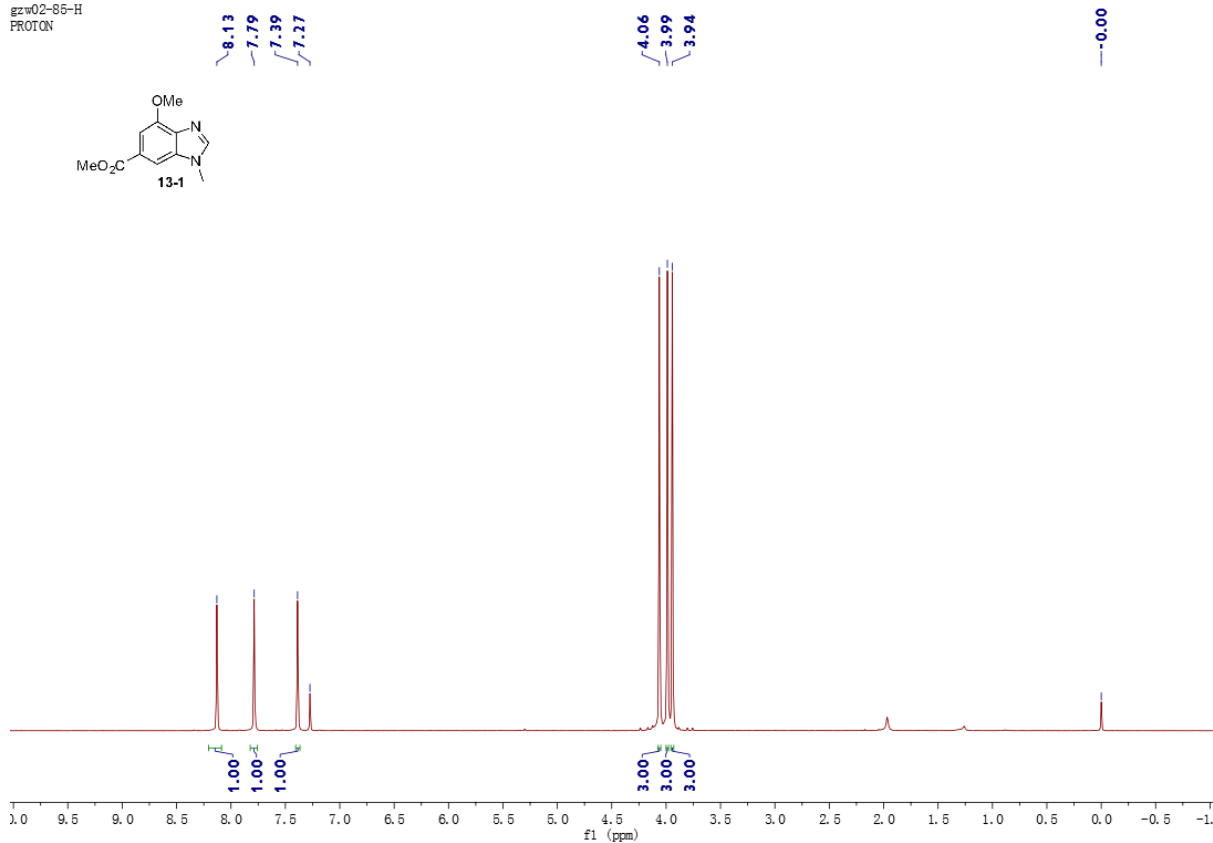

gzw02-85-C  
C13CPD

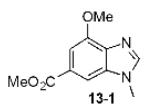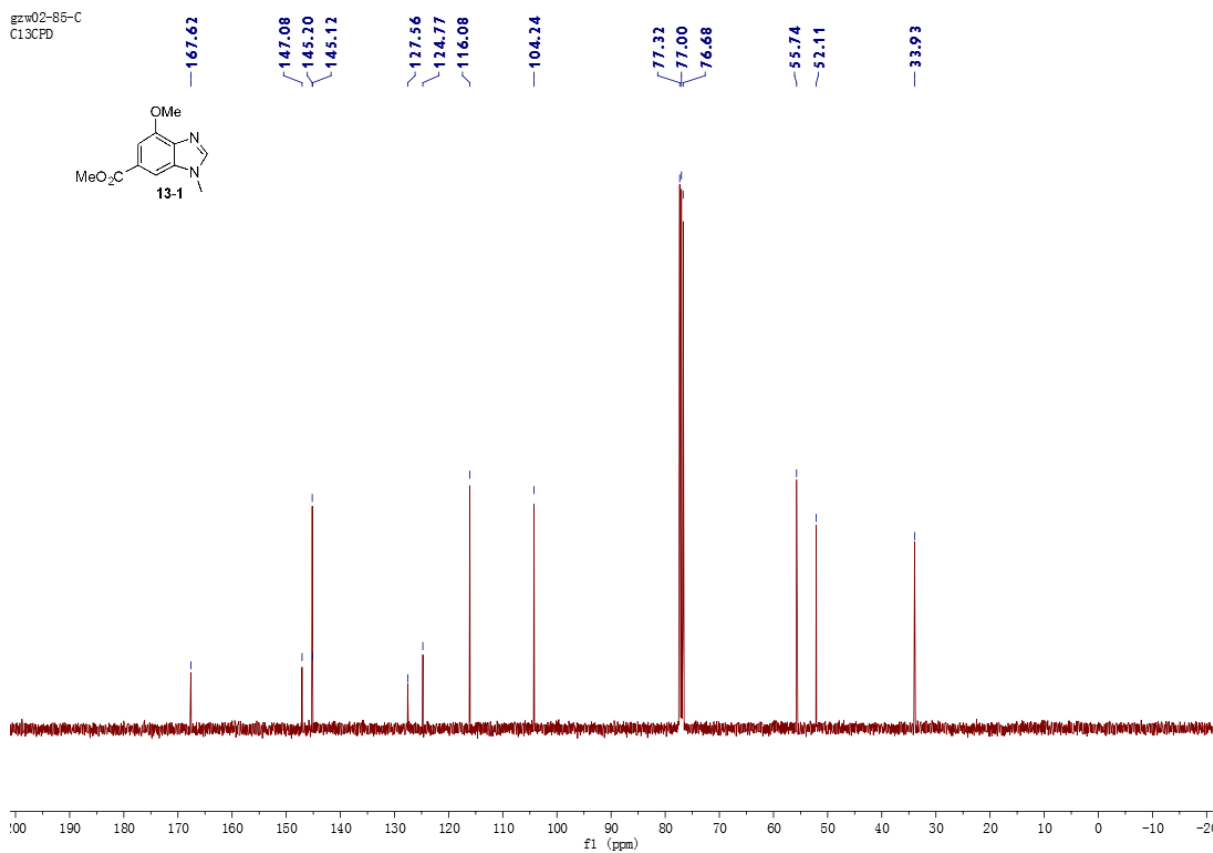

1gx-2-195  
PROTON

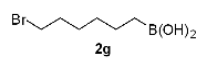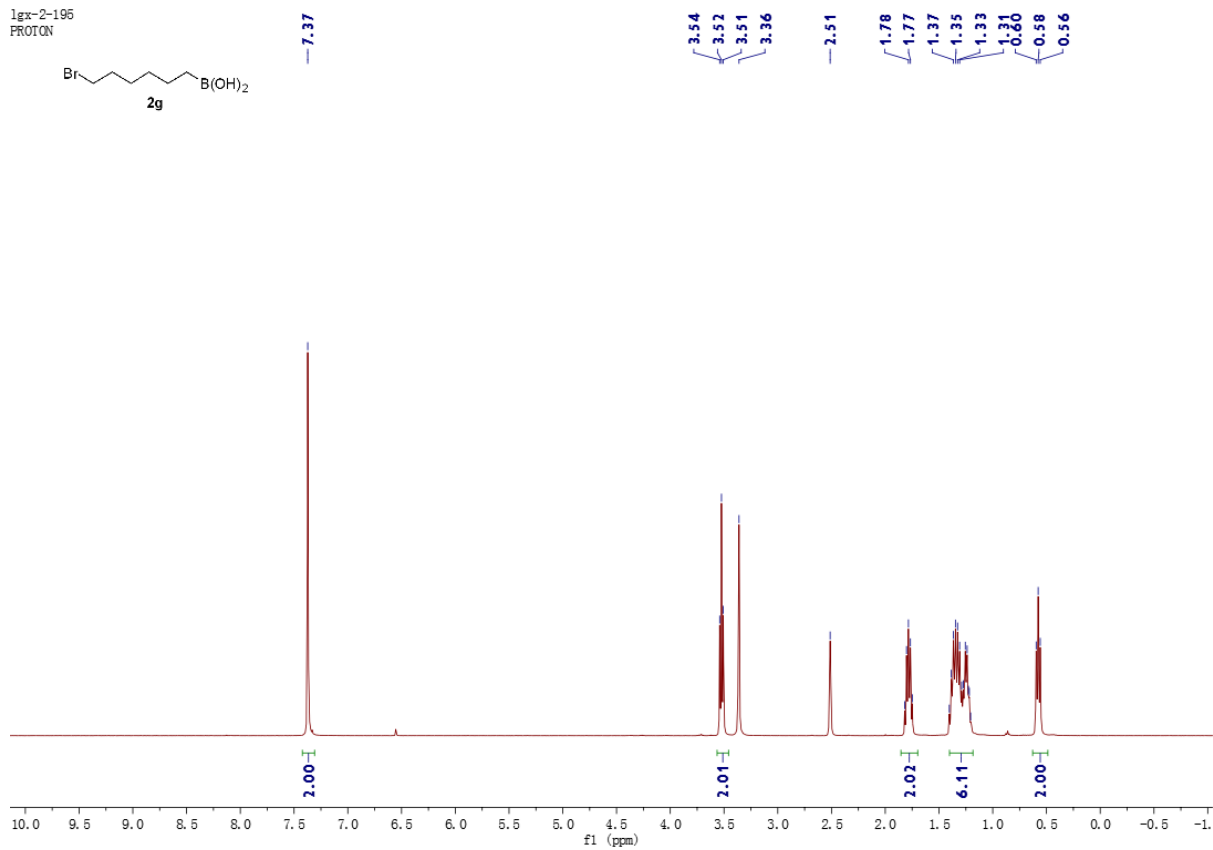

1gx-2-195  
C13CPD

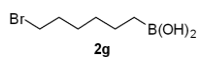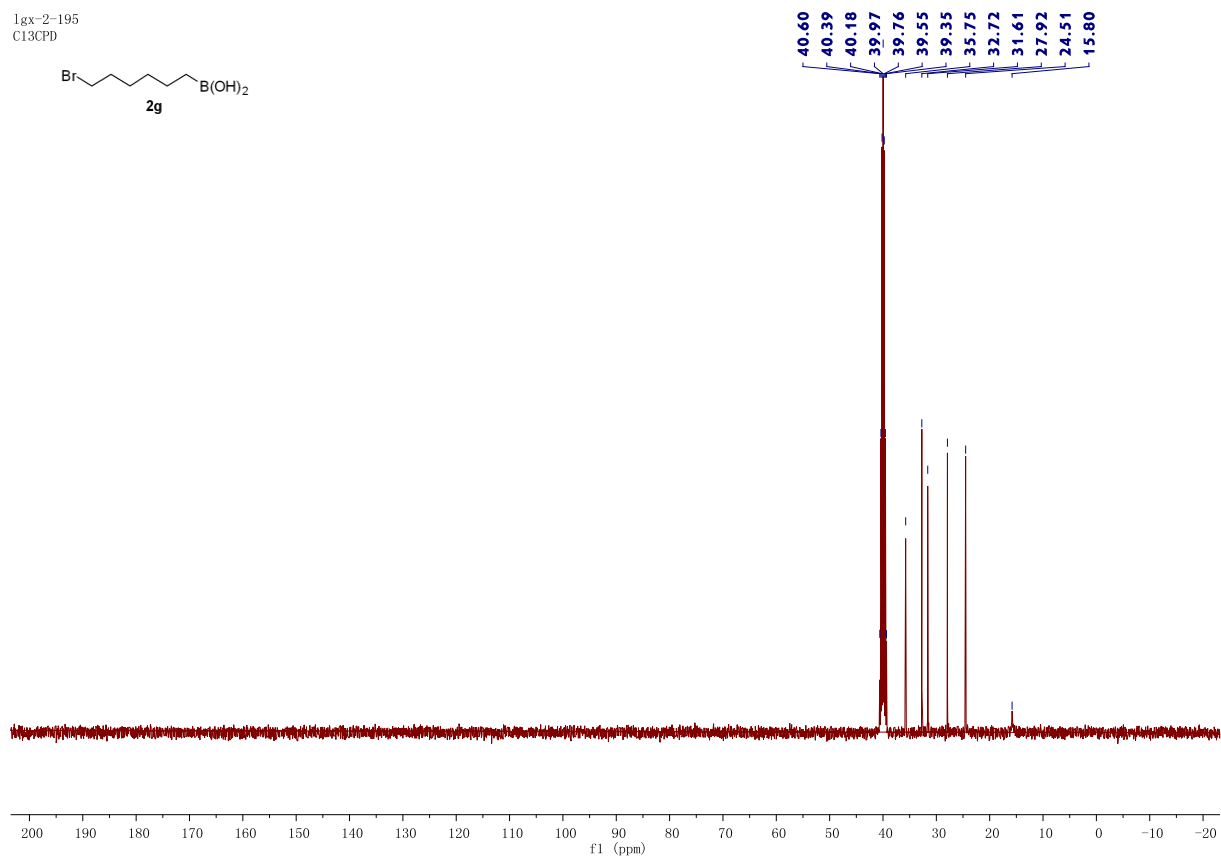

ef1-IB  
PROTON

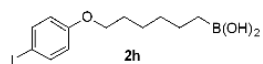

7.61  
7.59  
7.40  
6.82  
6.80  
6.59  
3.97  
3.95  
3.94  
3.38  
2.54  
1.71  
1.40  
1.39  
1.37  
1.35  
1.21  
0.83  
0.61  
0.59

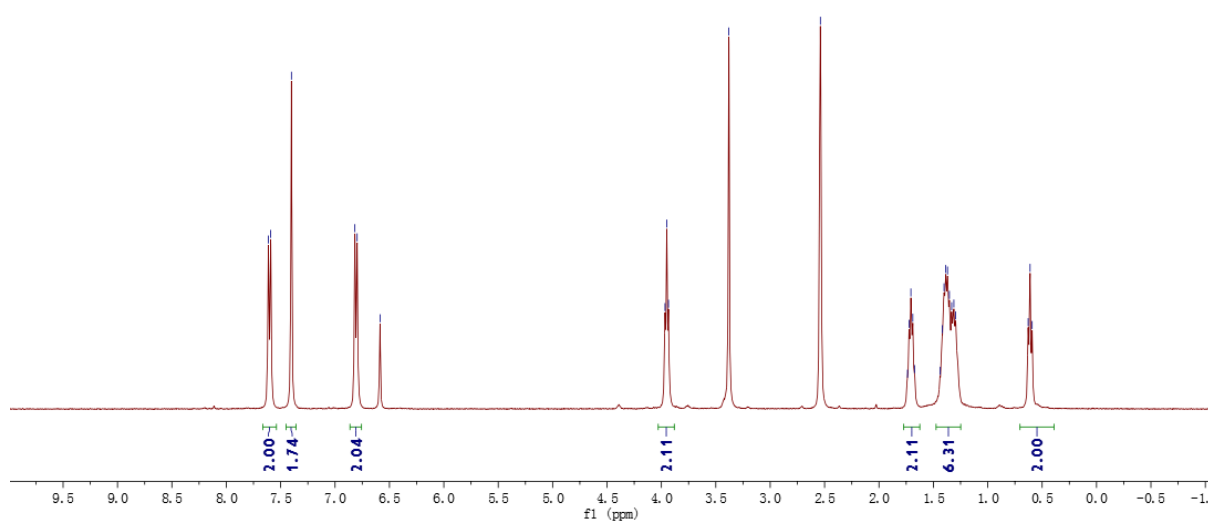

ef1-IB C  
C13CPD

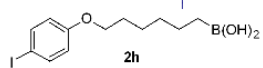

159.03  
138.37  
117.67  
83.25  
68.07  
40.57  
40.36  
40.15  
39.94  
39.73  
39.53  
39.32  
32.29  
29.02  
25.86  
24.64  
15.88

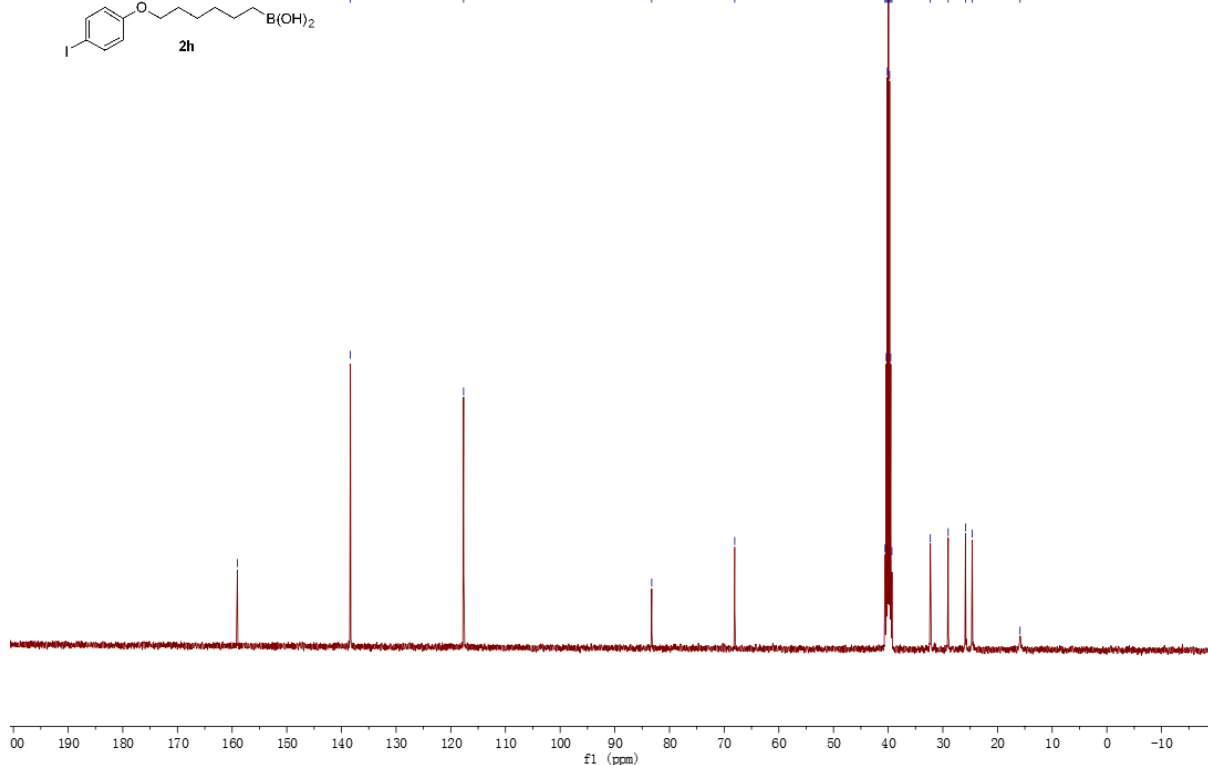

1gx-2-202  
PROTON

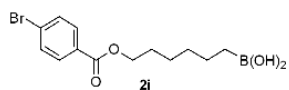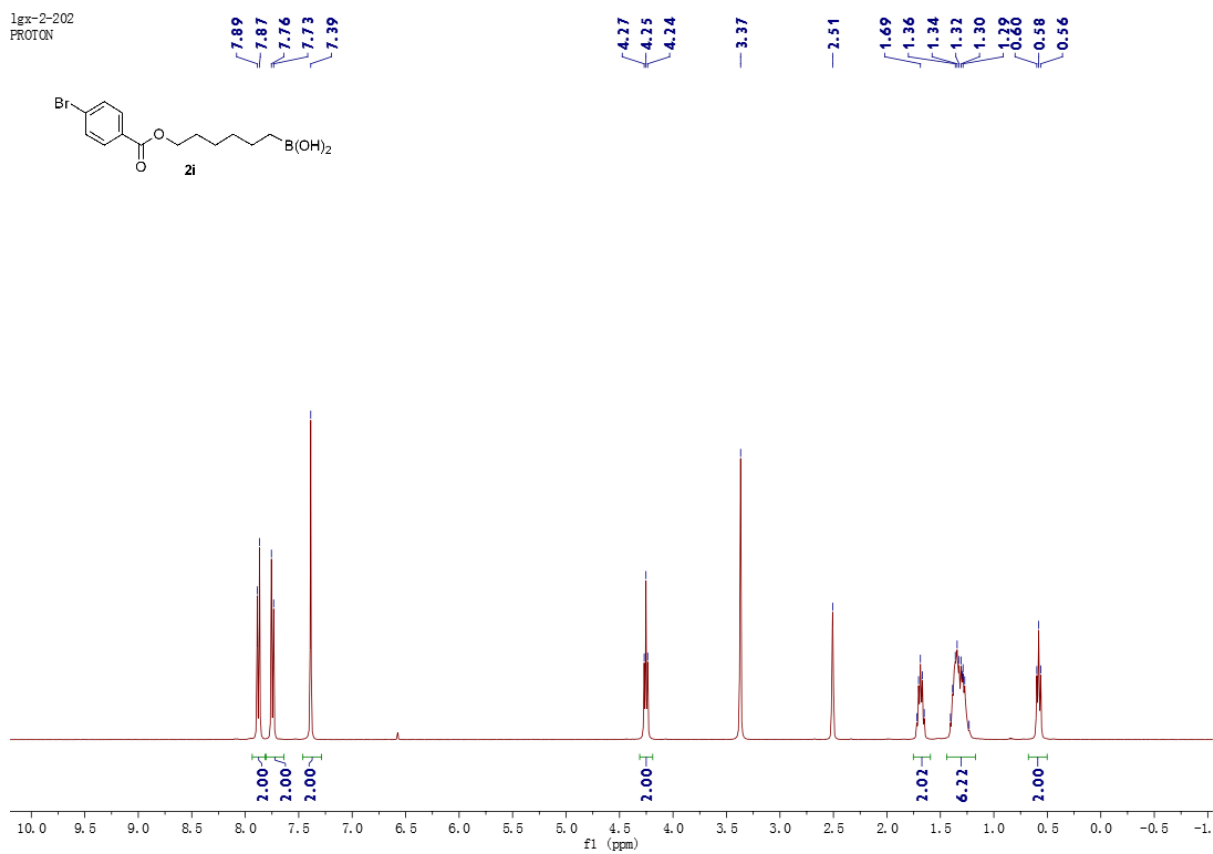

1gx-02-202  
C13CPD

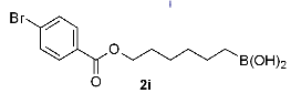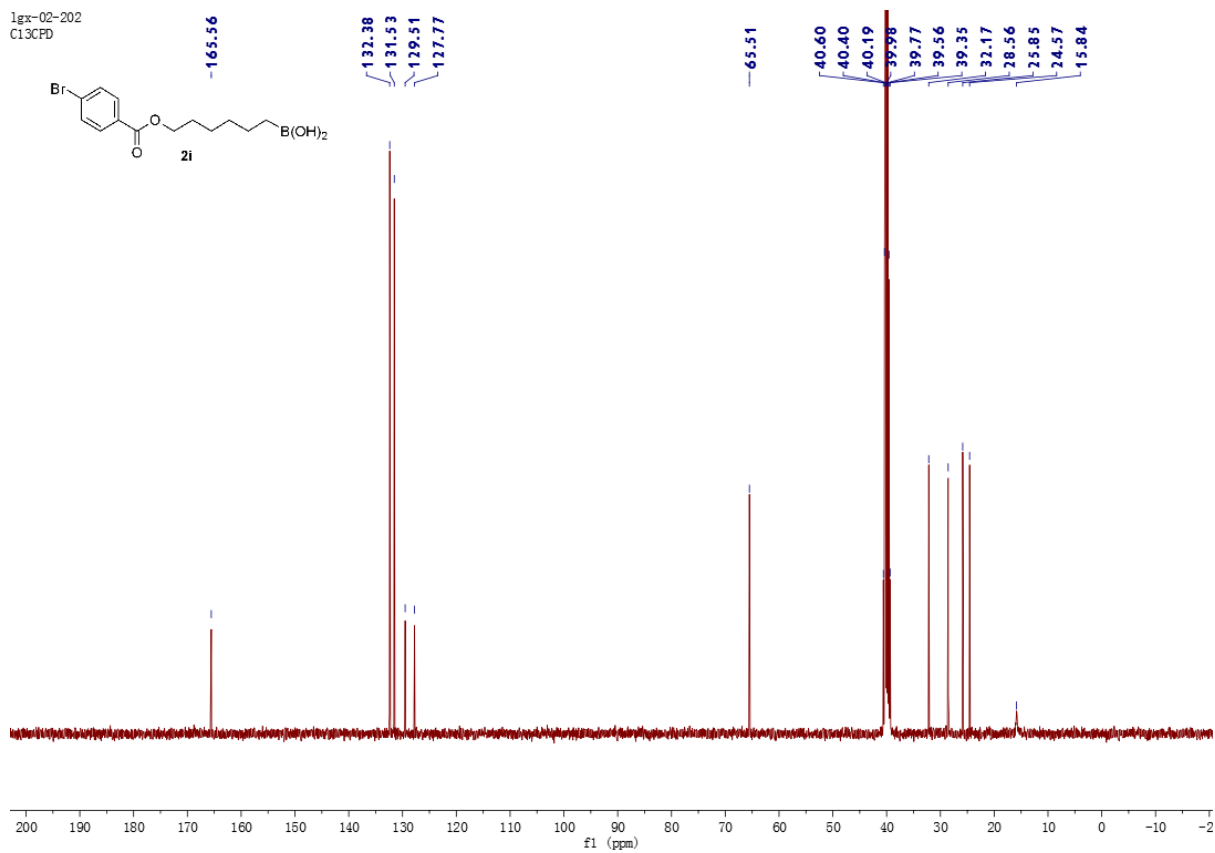

1gx-04-36 h  
PROTON

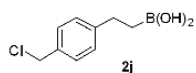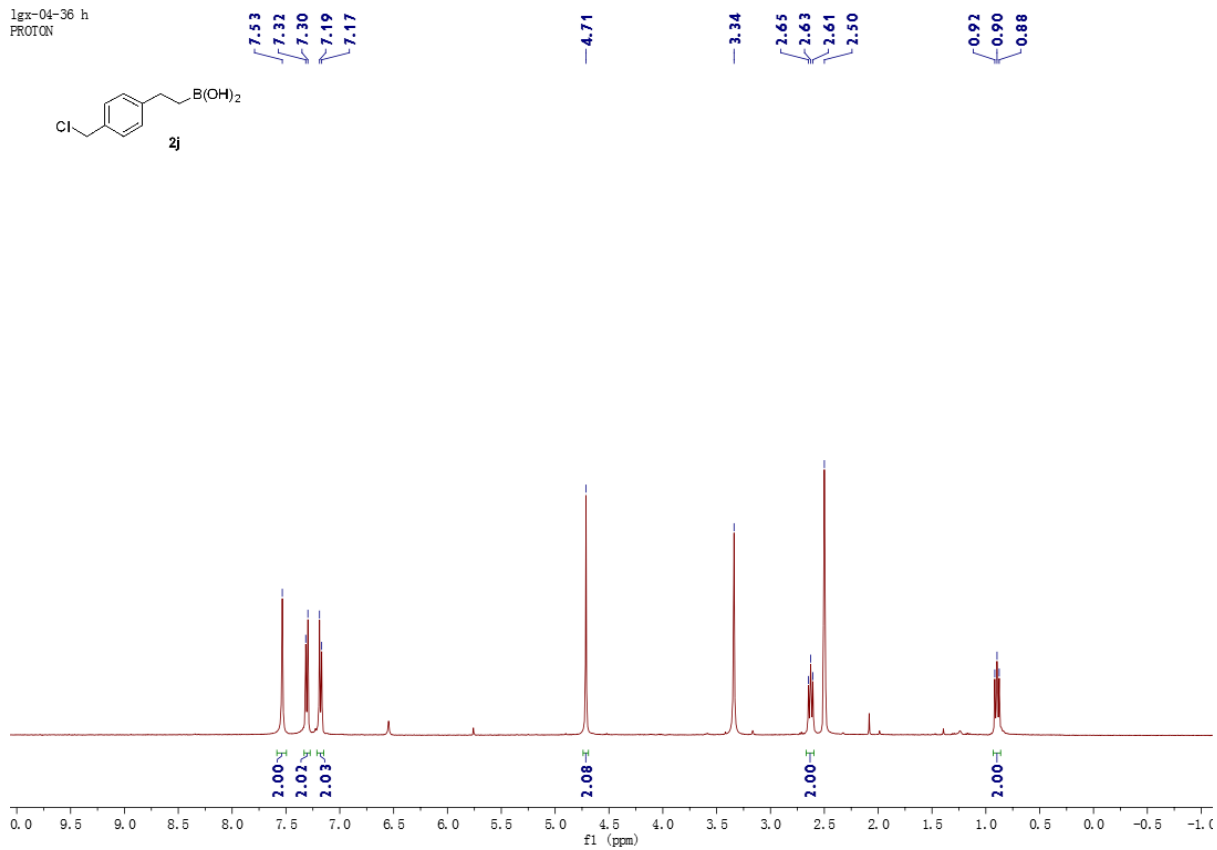

1gx-04-36  
C13CPD

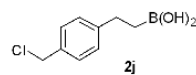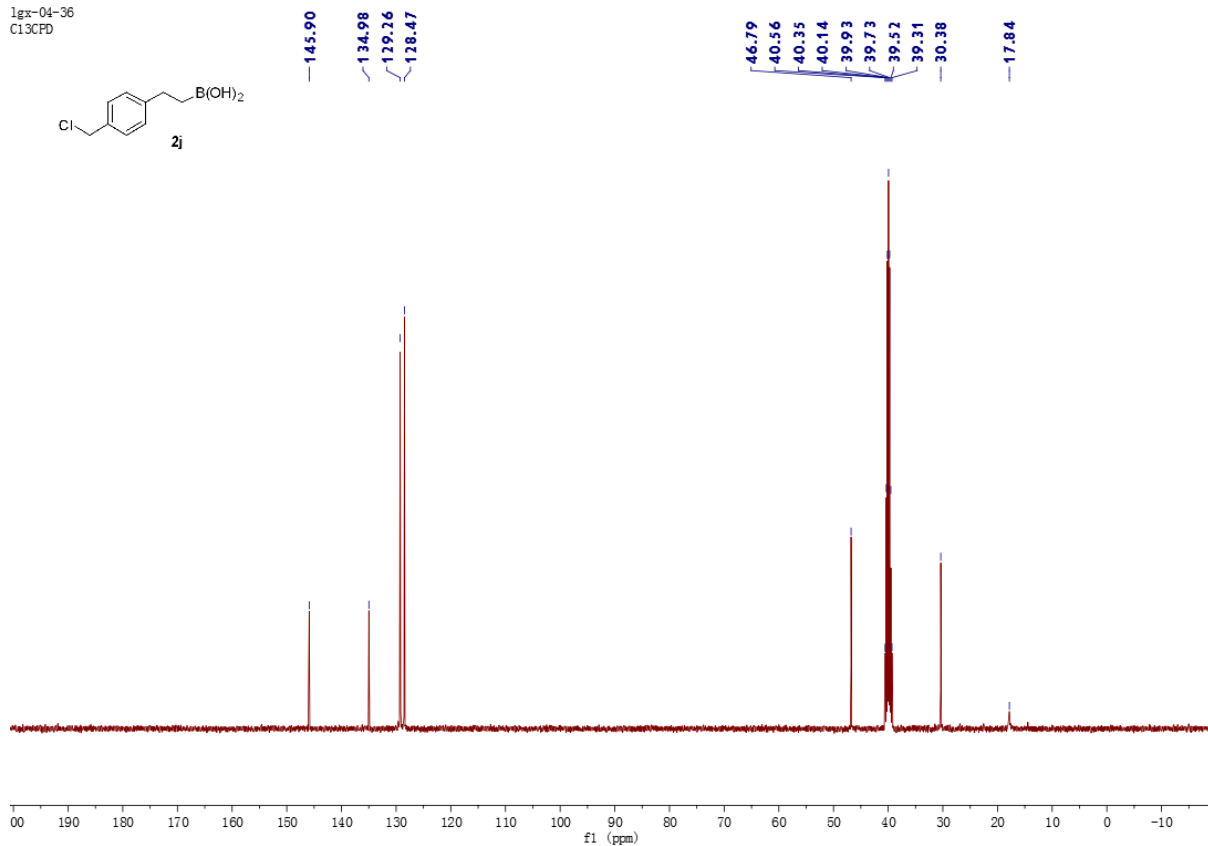

1gx-03-70  
PROTON

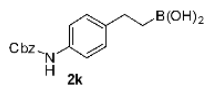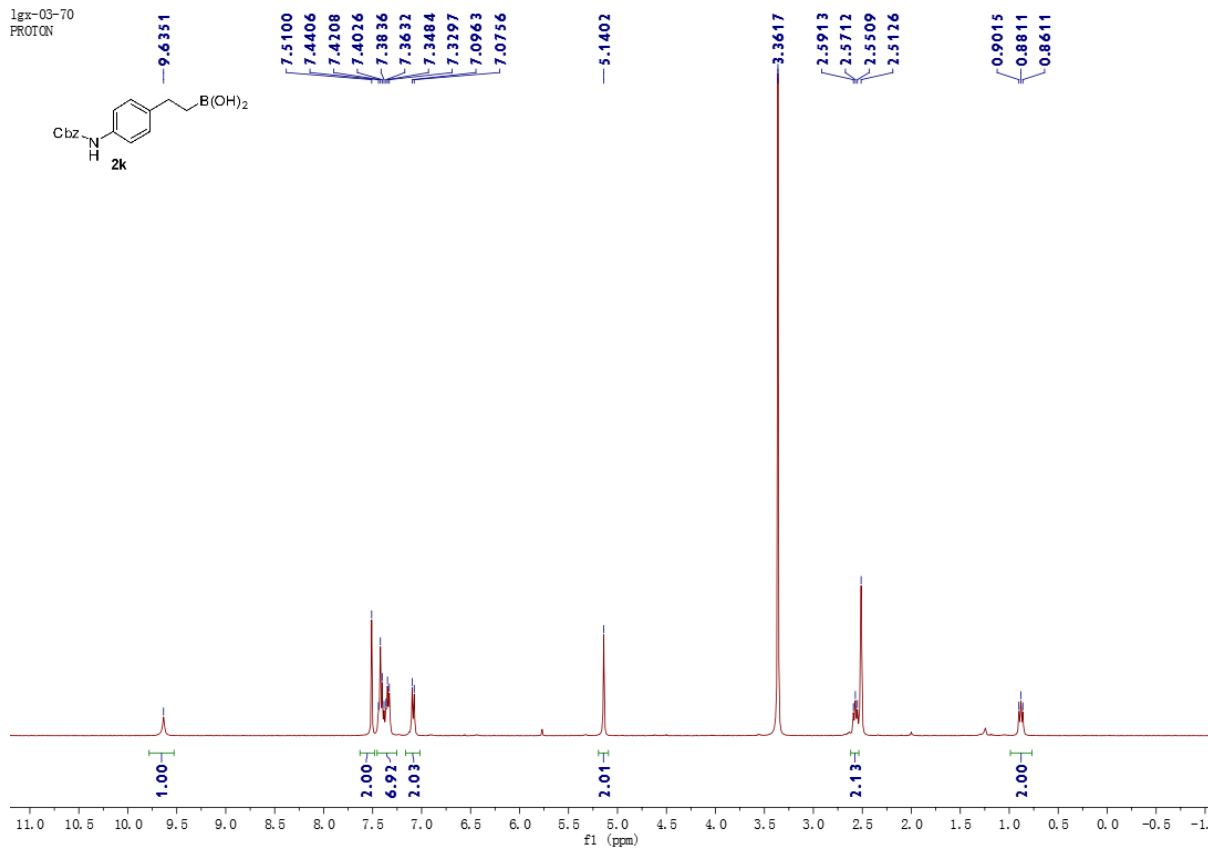

1gx-03-70-C  
C13CPD

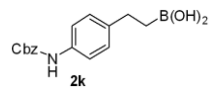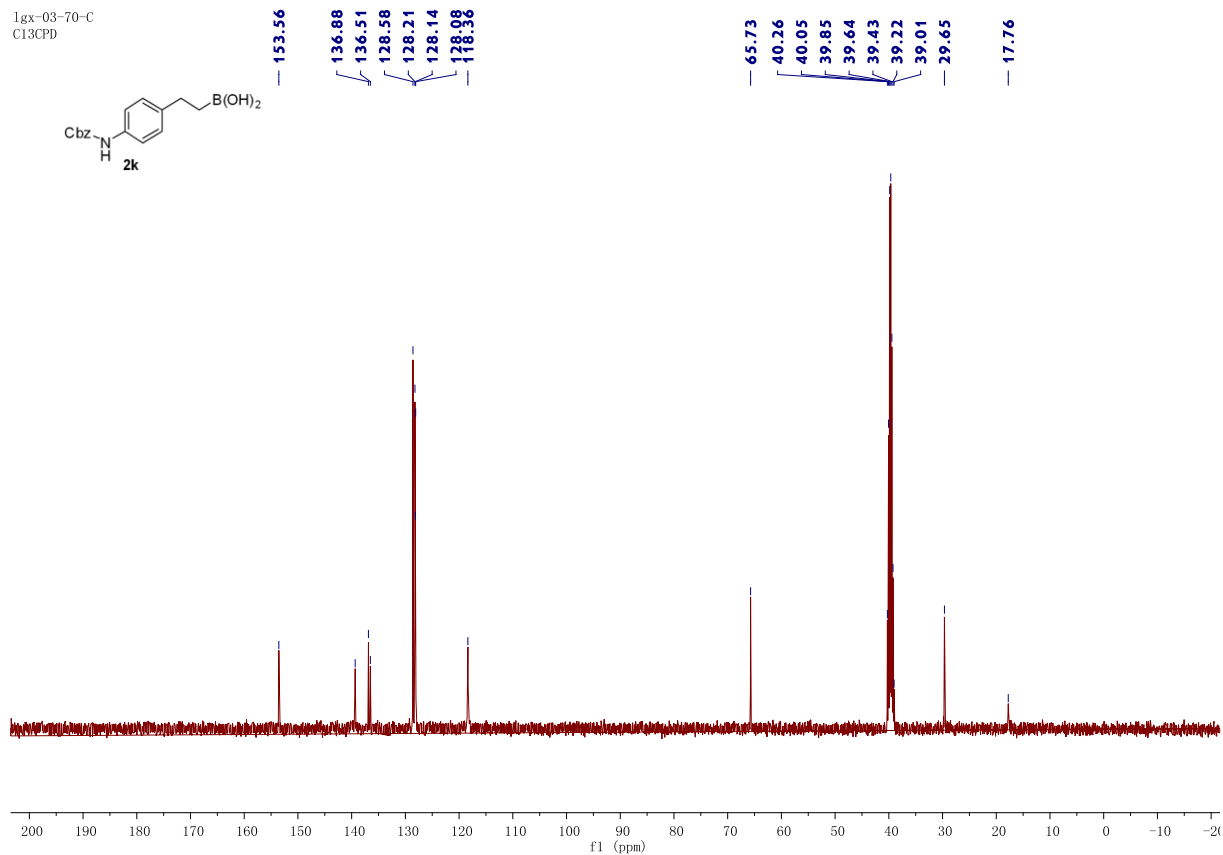



lgx-03-79  
test

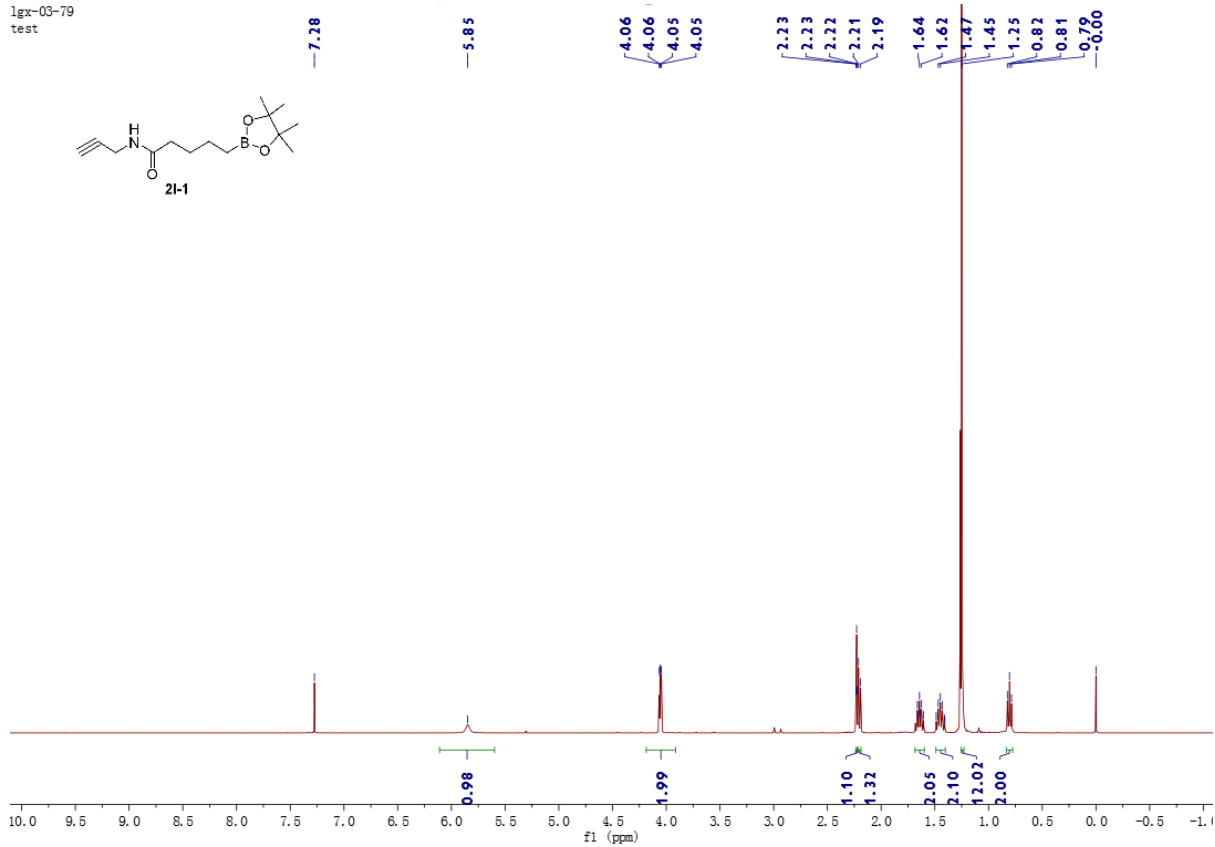

lgx-03-79  
C13CPD

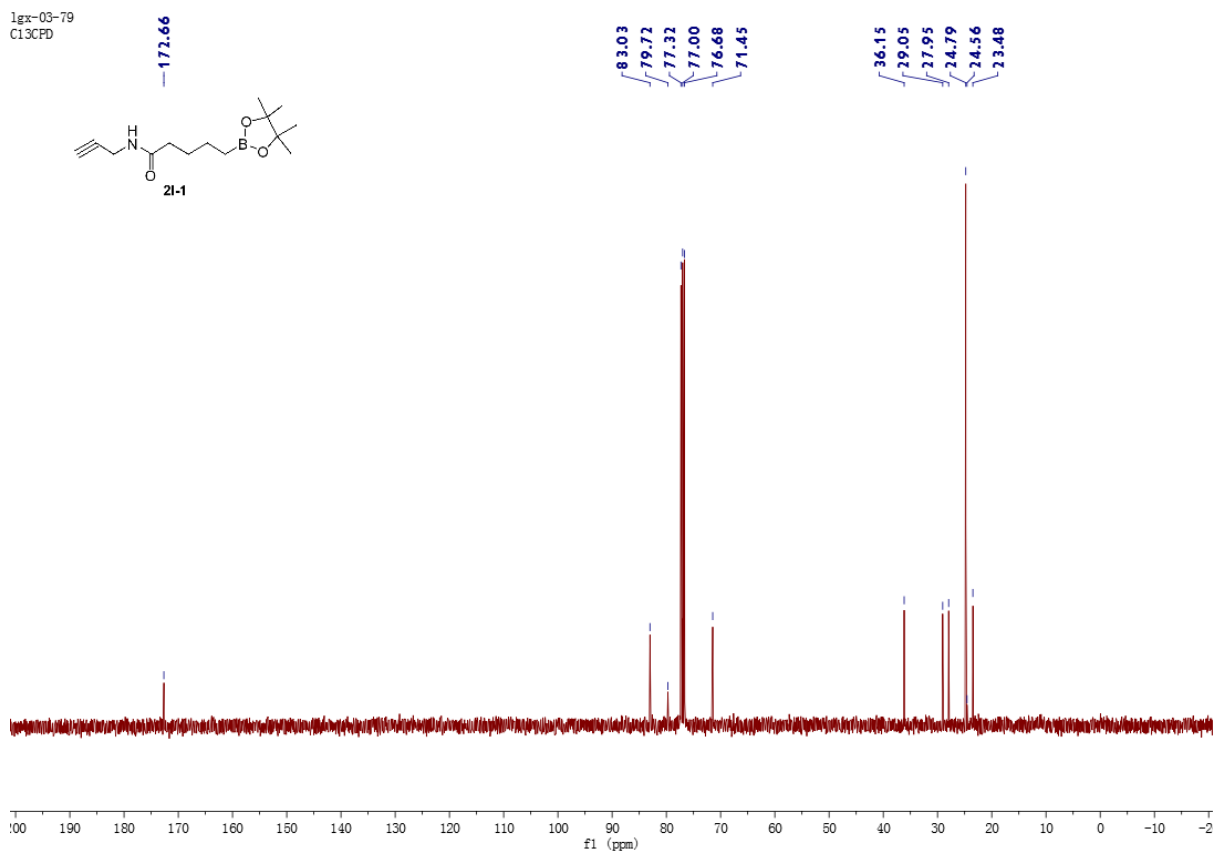

gf1-162  
test

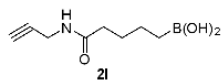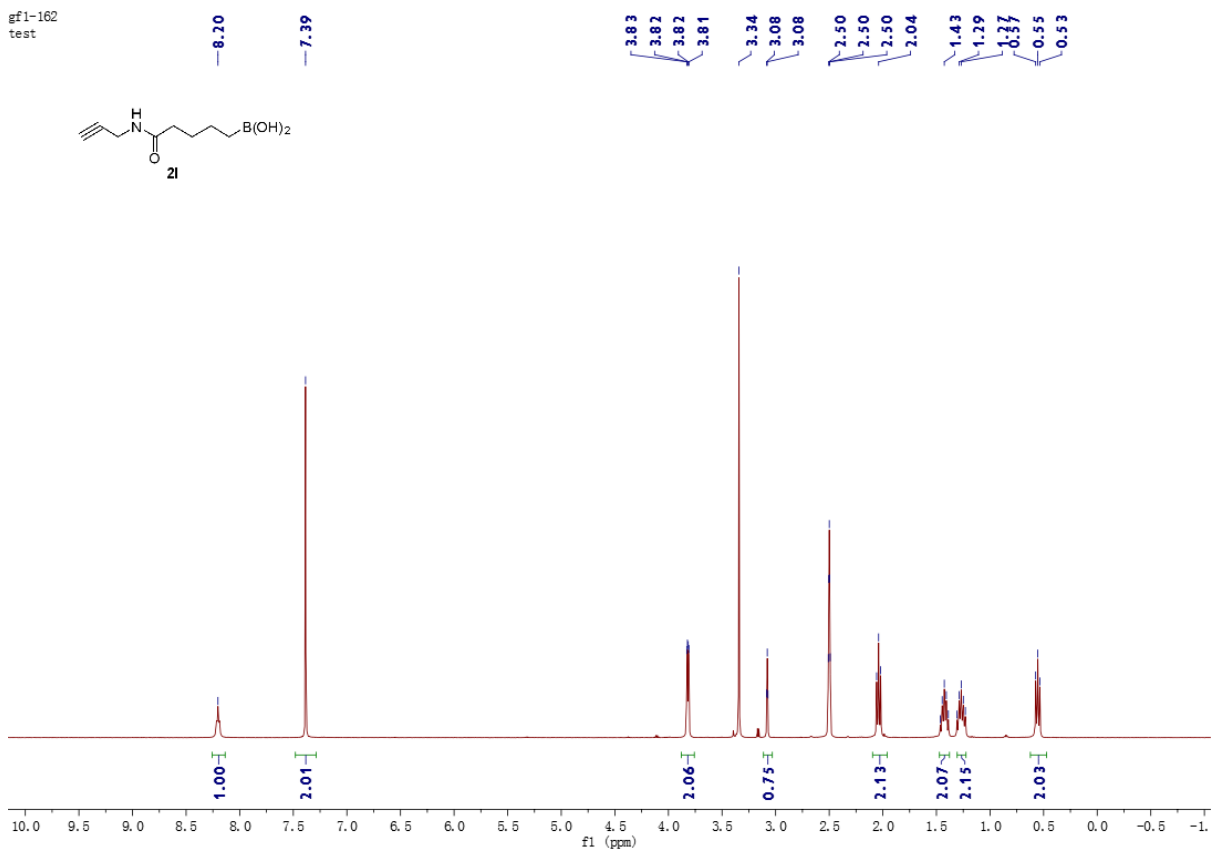

1gx-03-83-C  
C13CPD

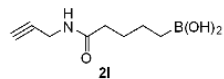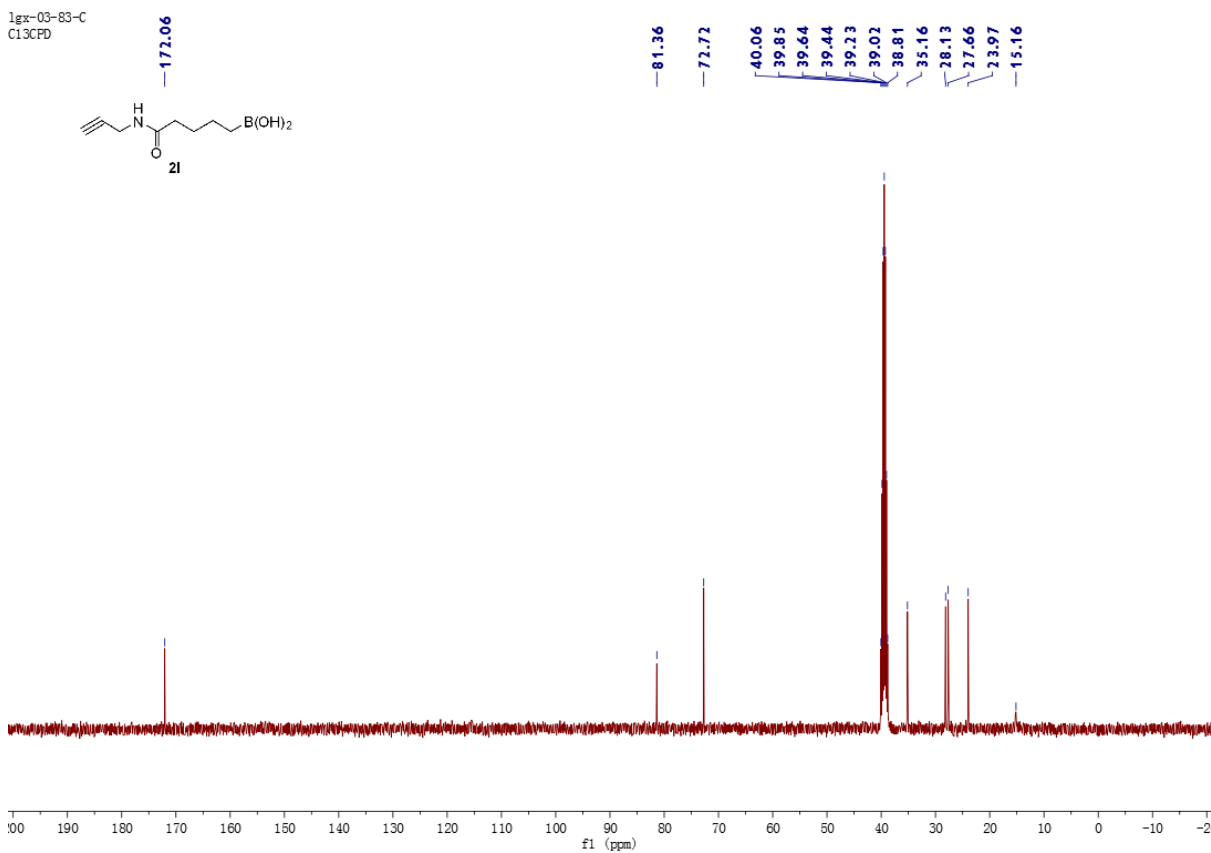

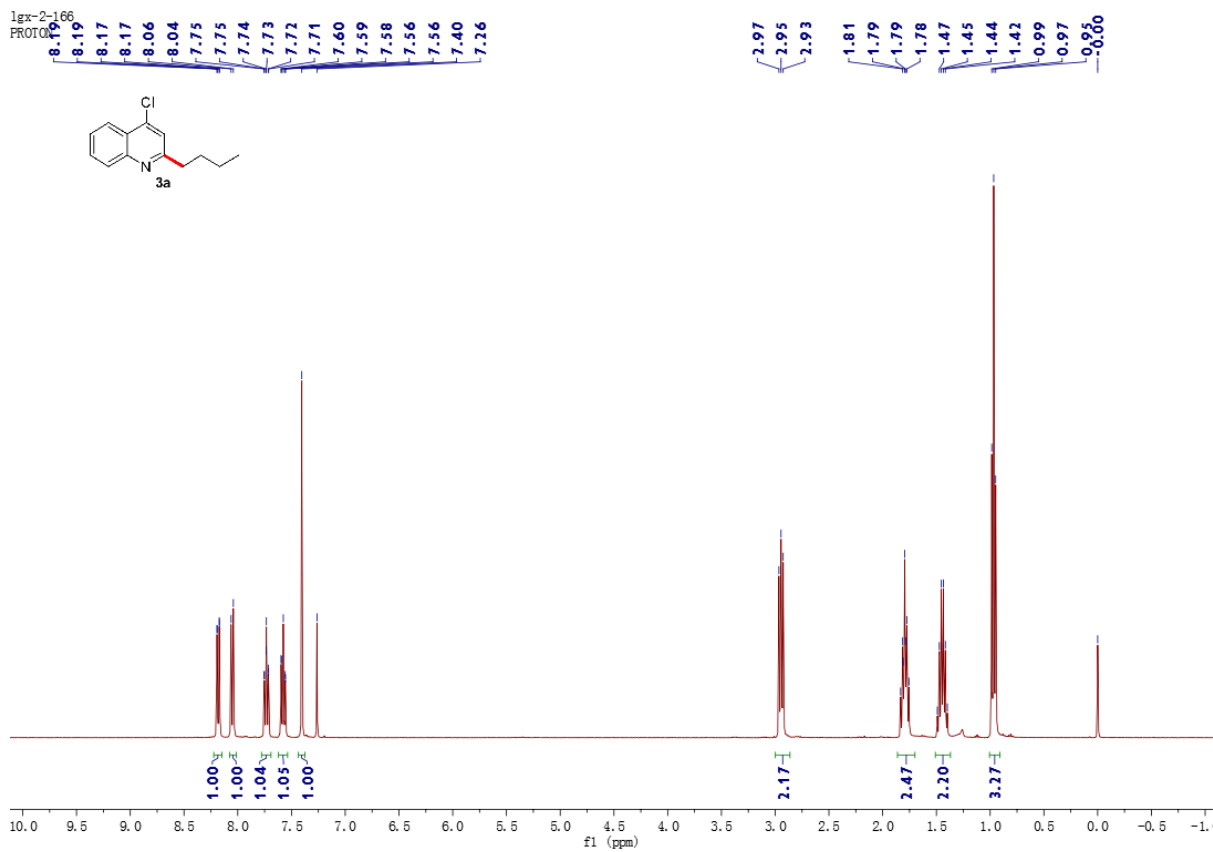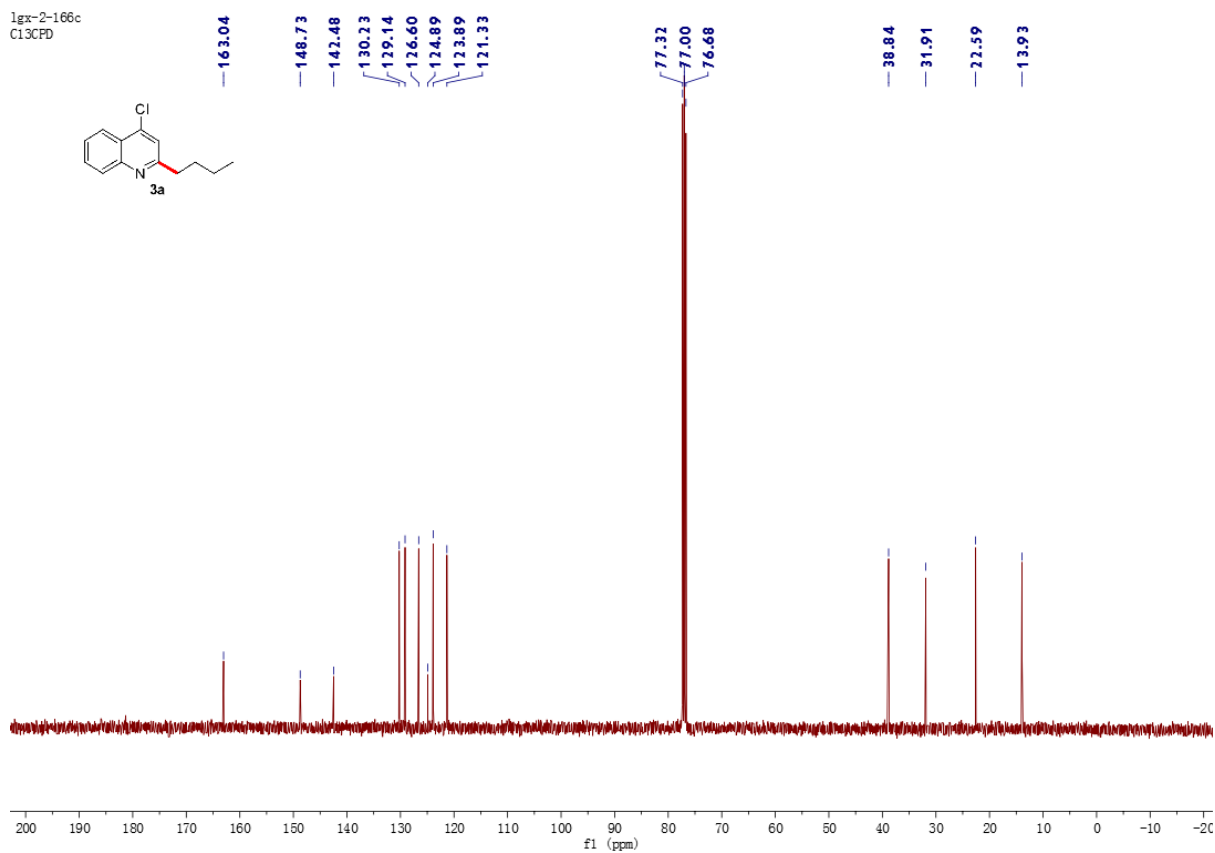

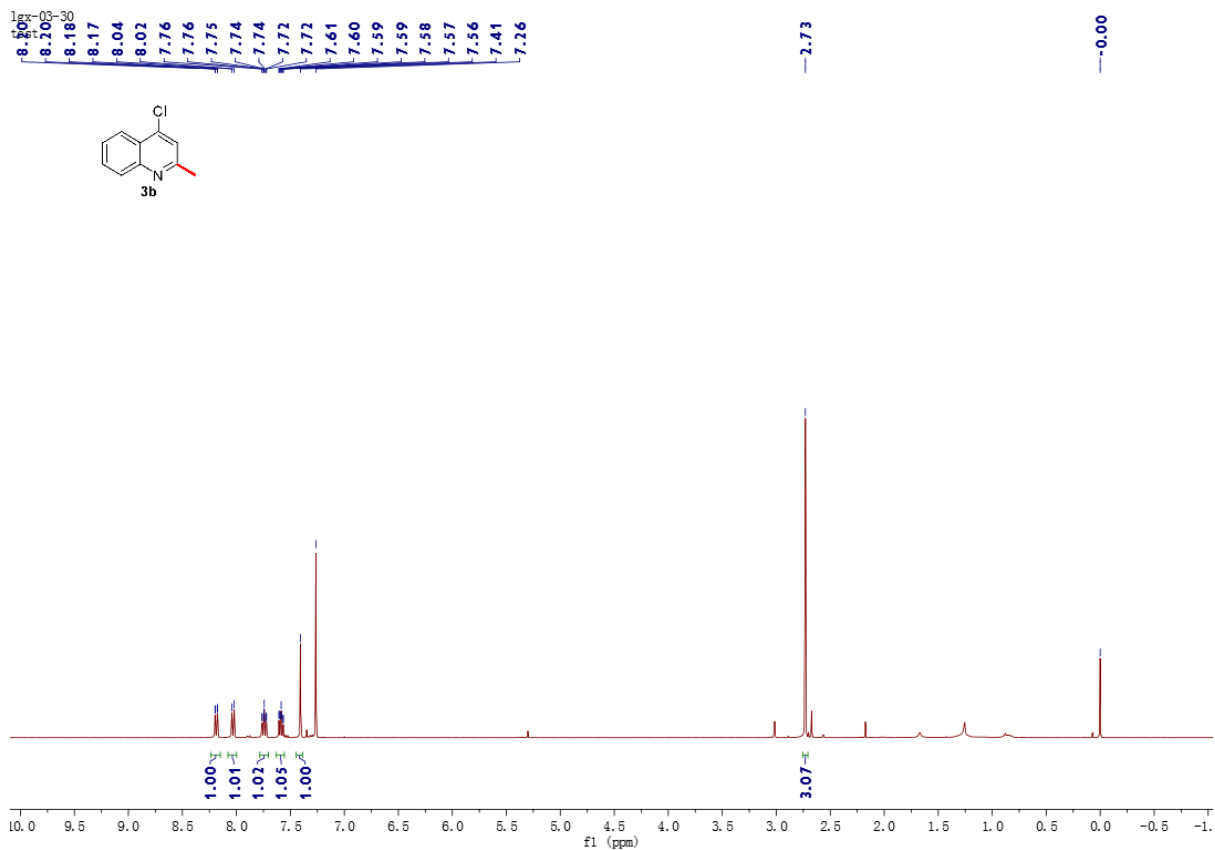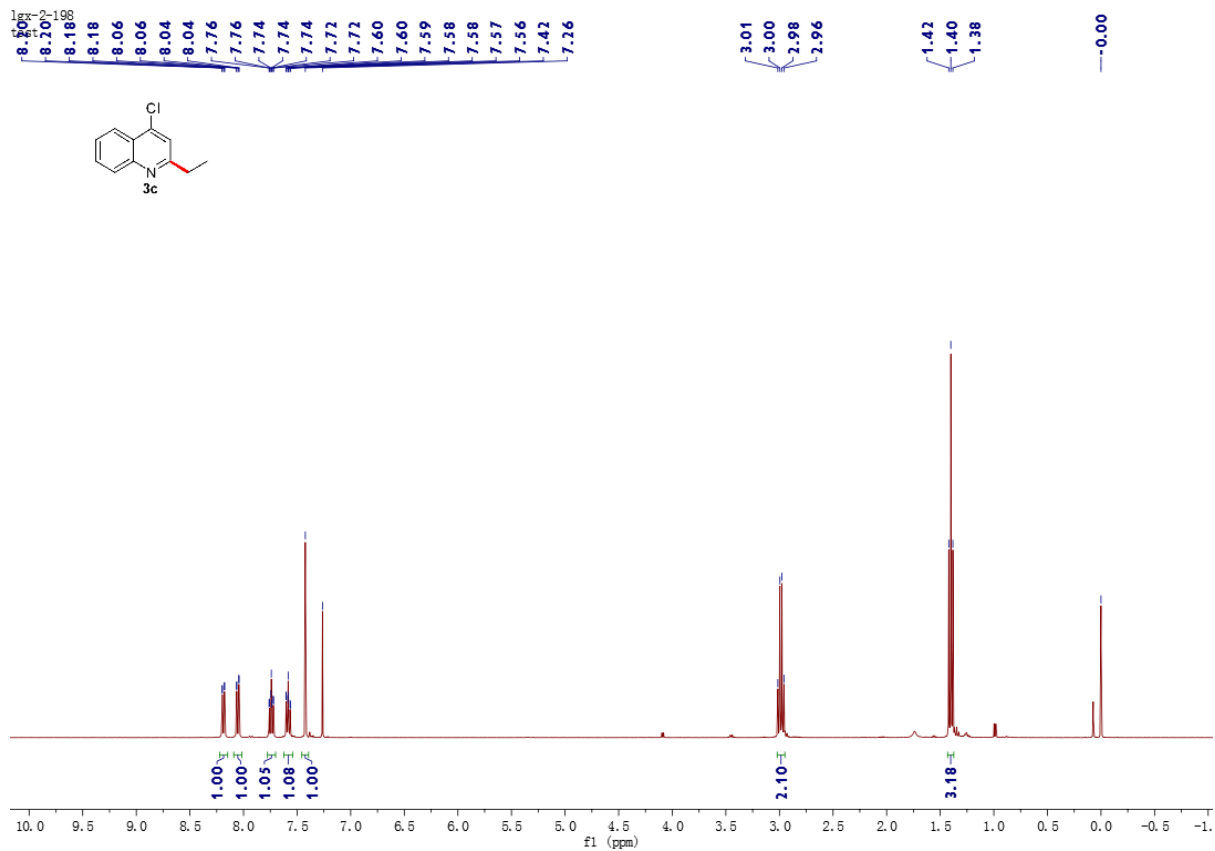

1gx-2-198  
Cl3CPD

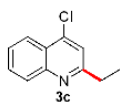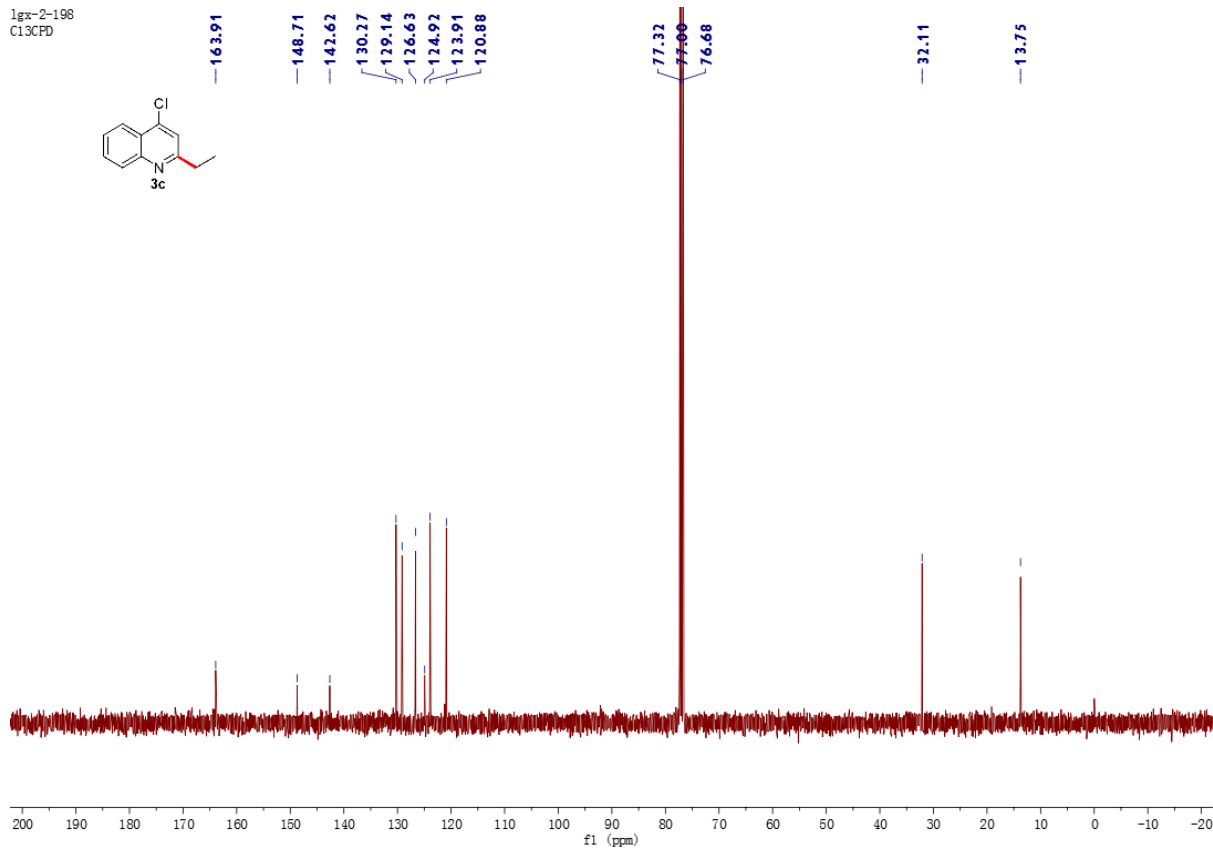

1gx-2-145H  
PROTON

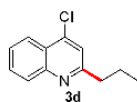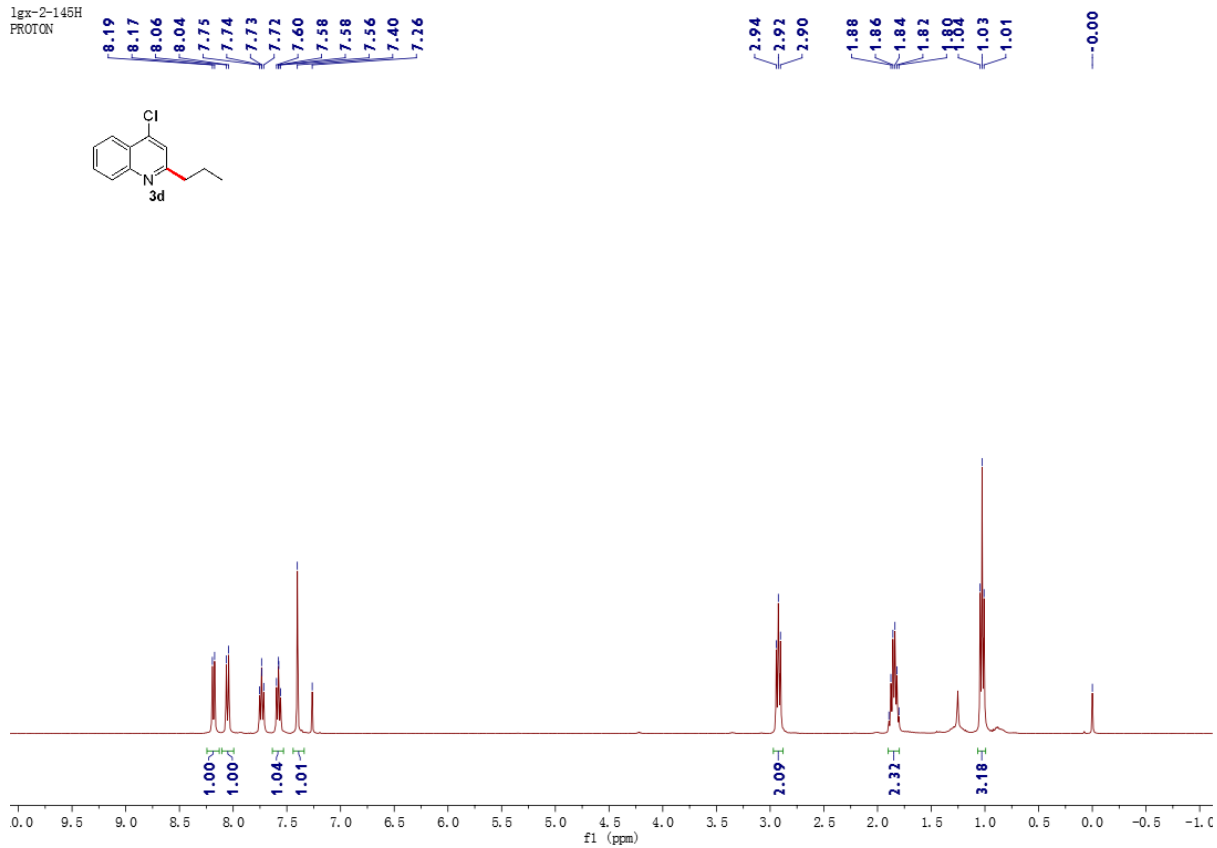

1gx-2-145C2  
Cl3CPD

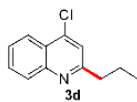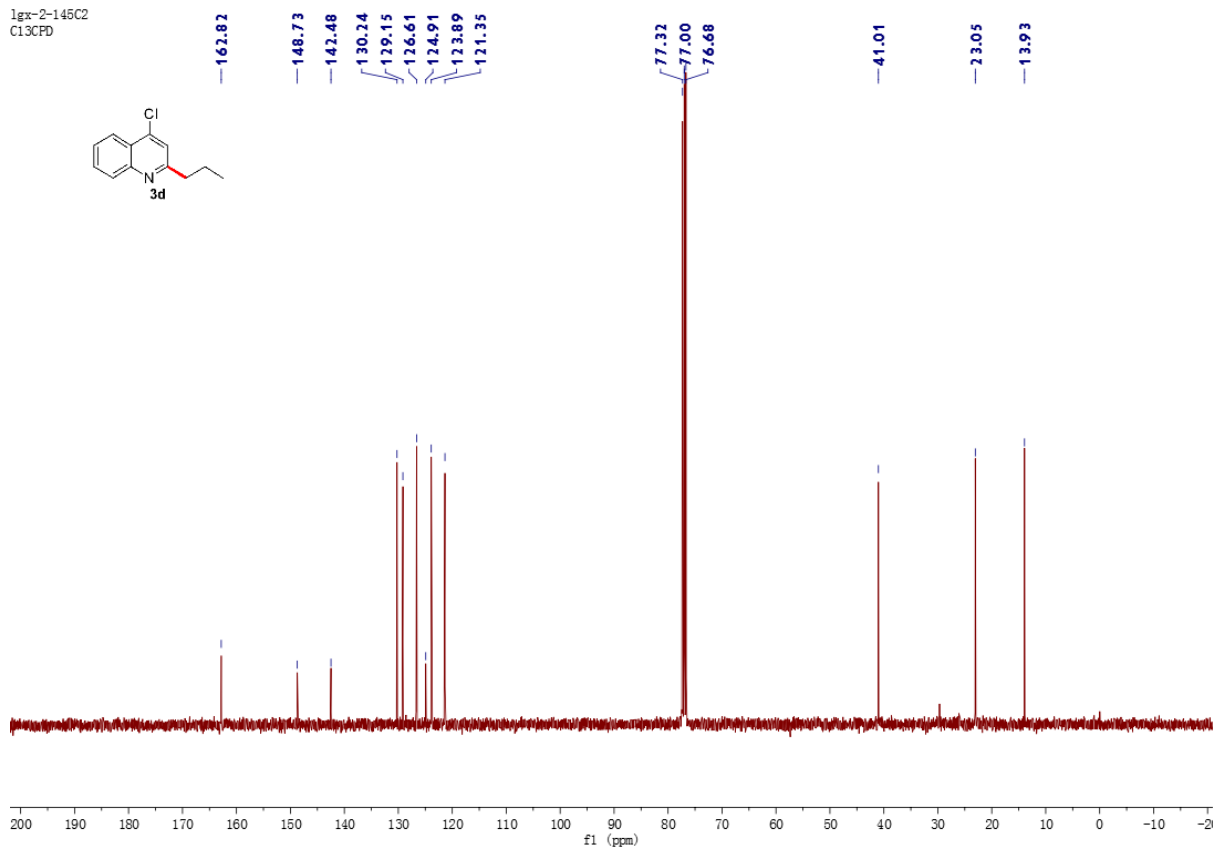

1gx-2-188  
PROTON

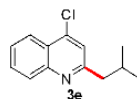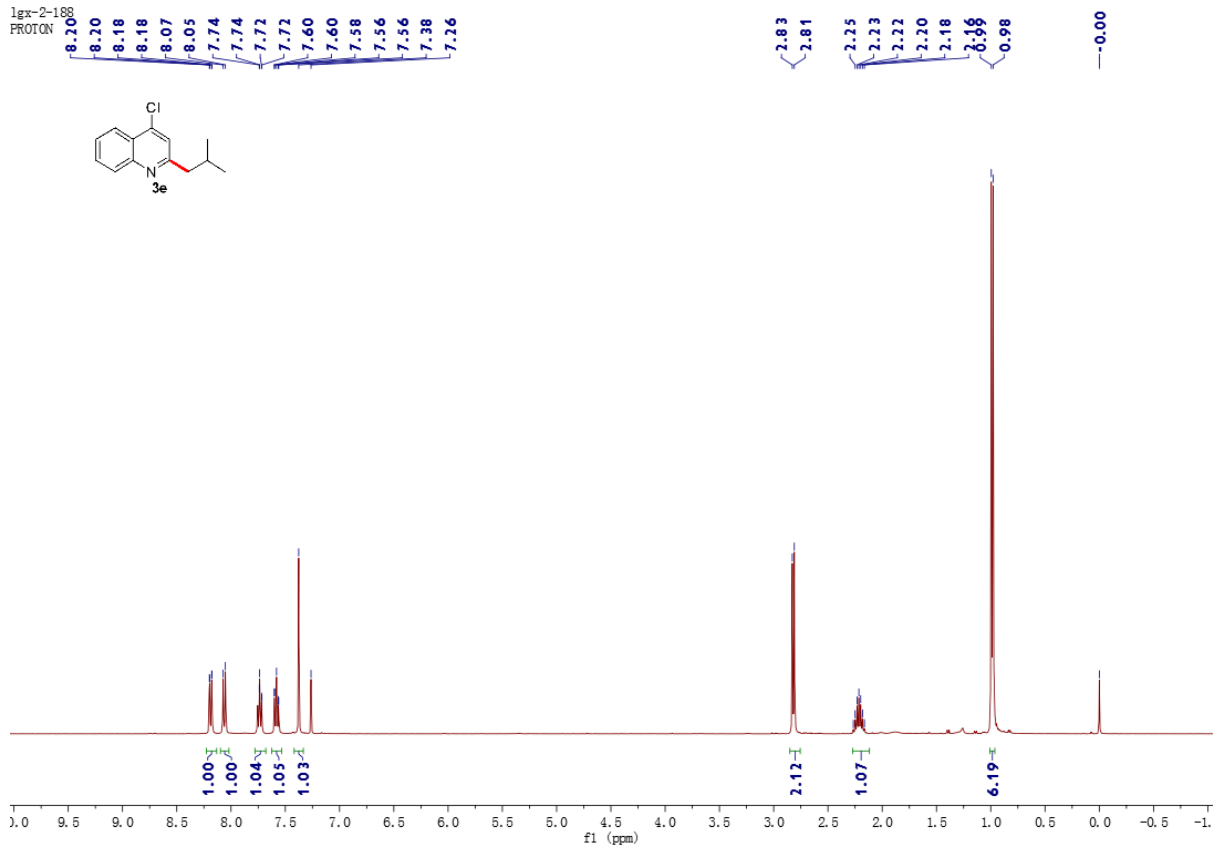

1gX-xx-c  
Cl3CPD

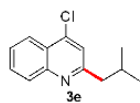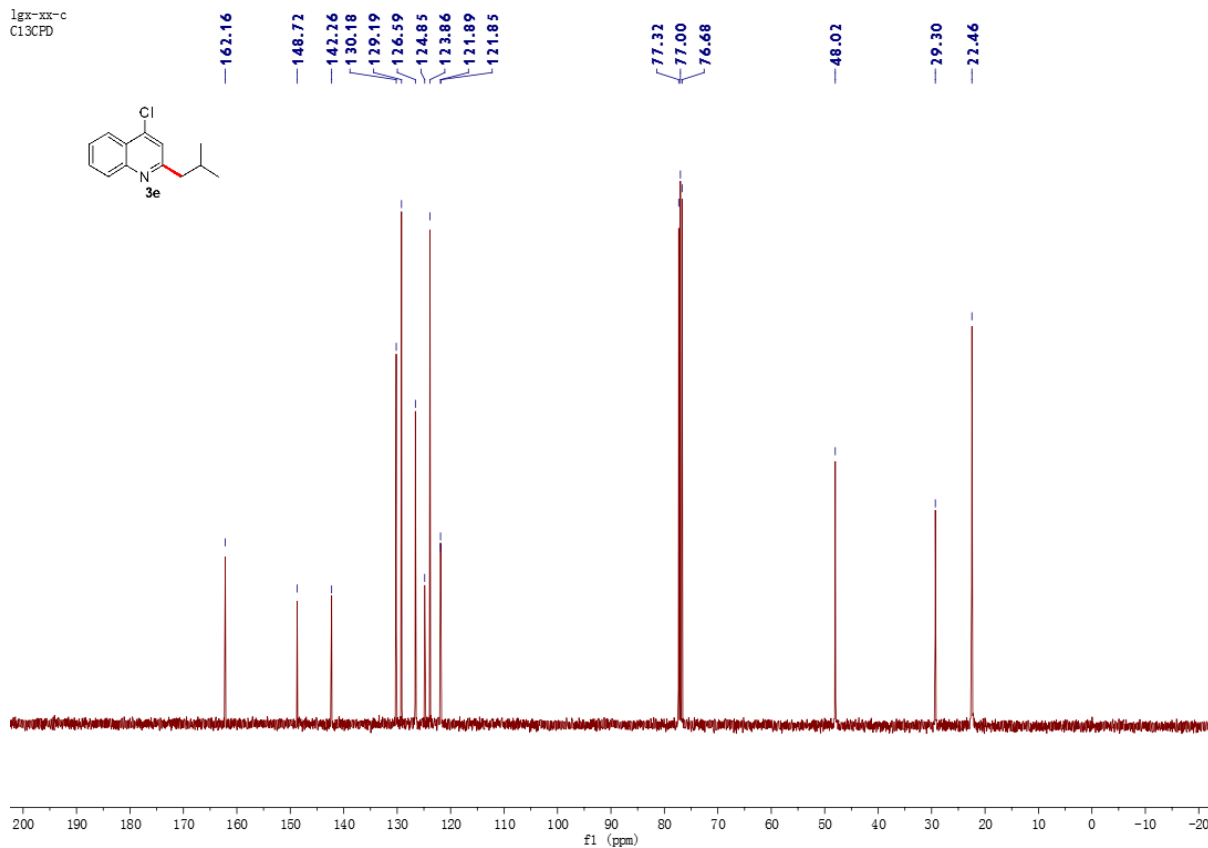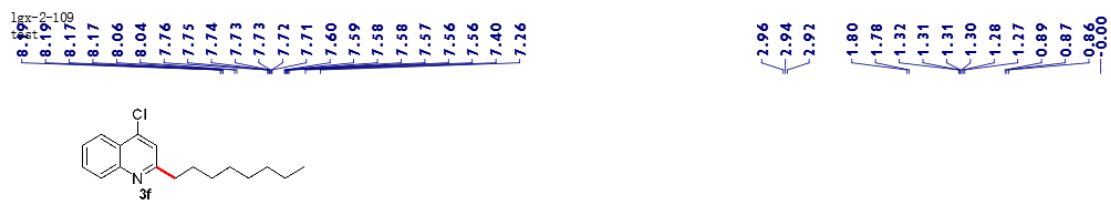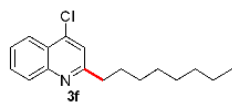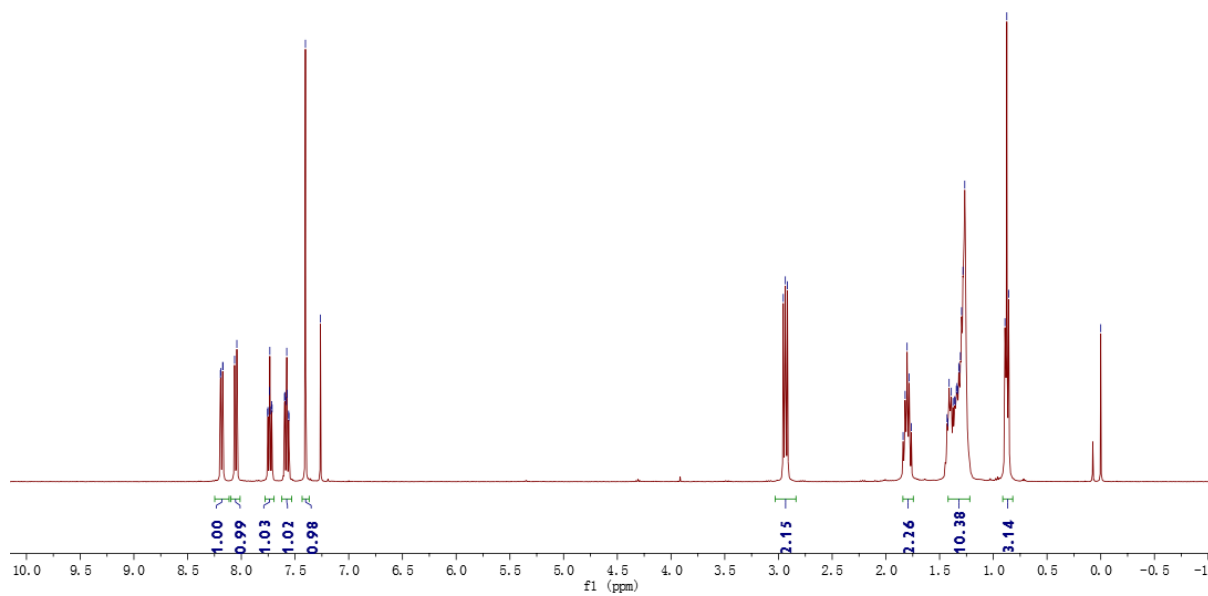

lgx-2-109  
test

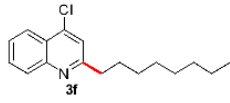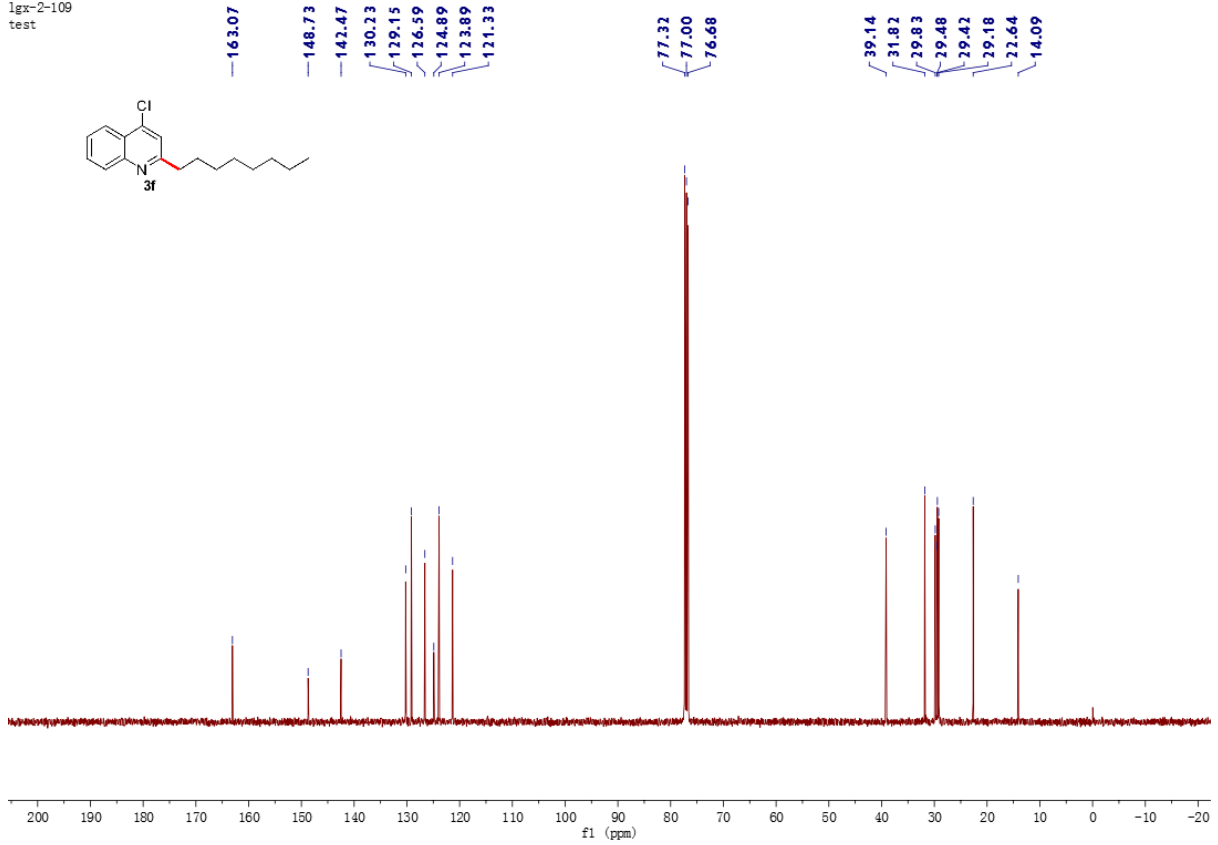

lgx-02-199  
PR000

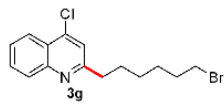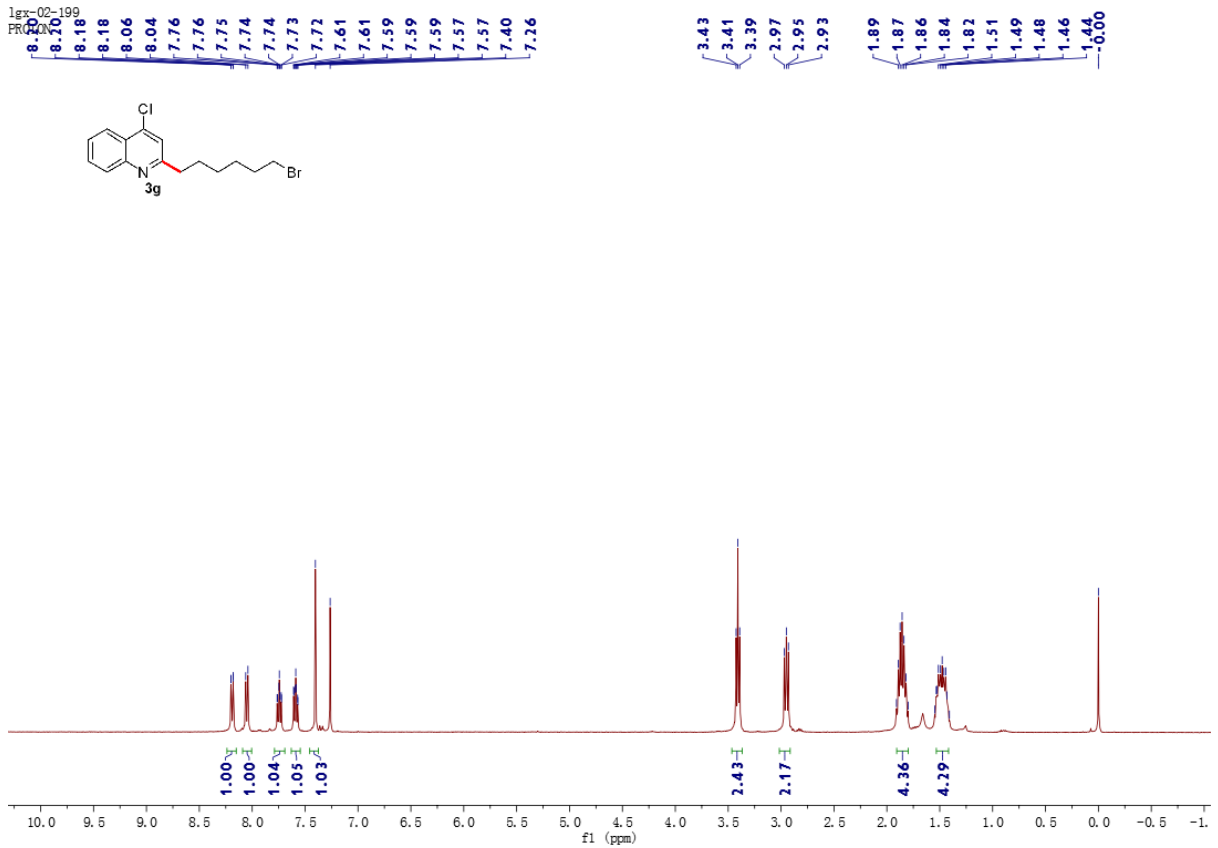



1gx-2-199c  
Cl3CPD

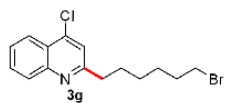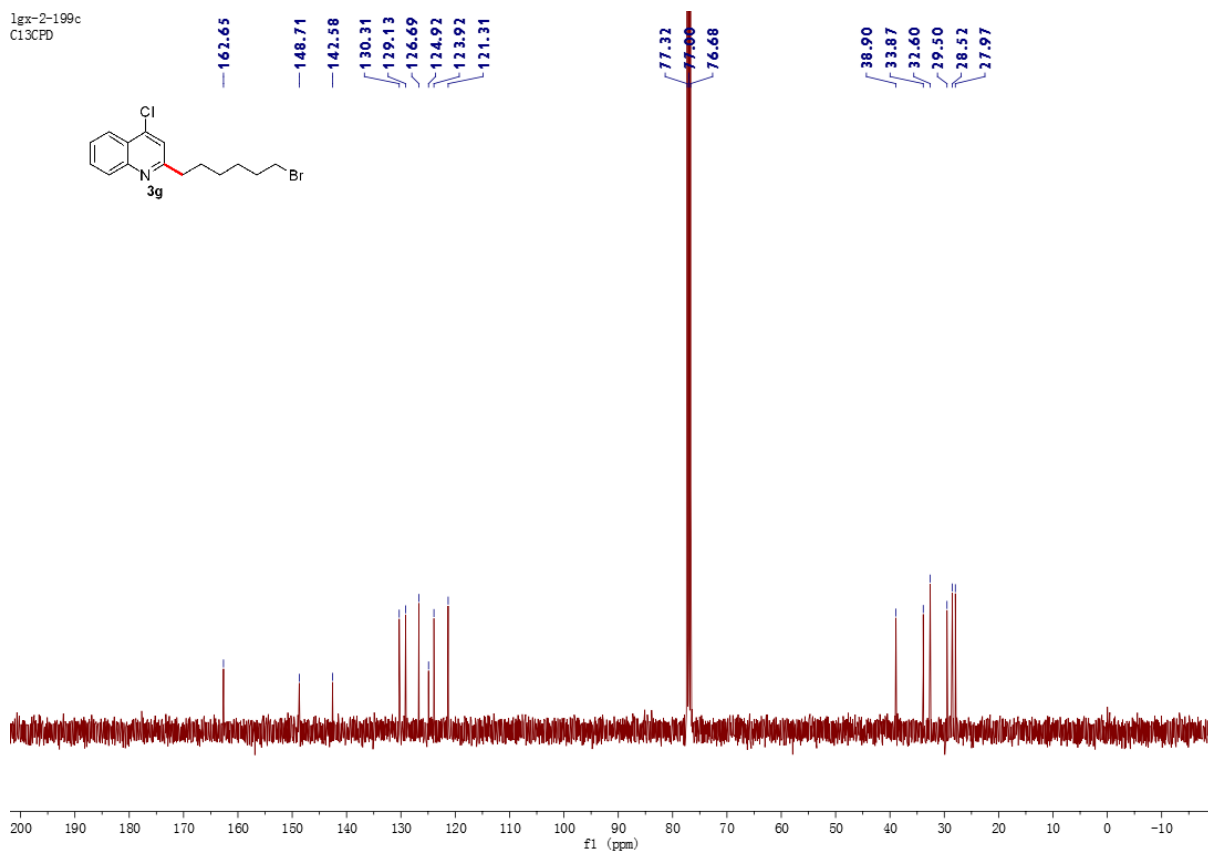

1gx-03-34

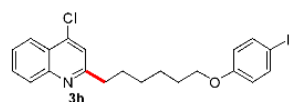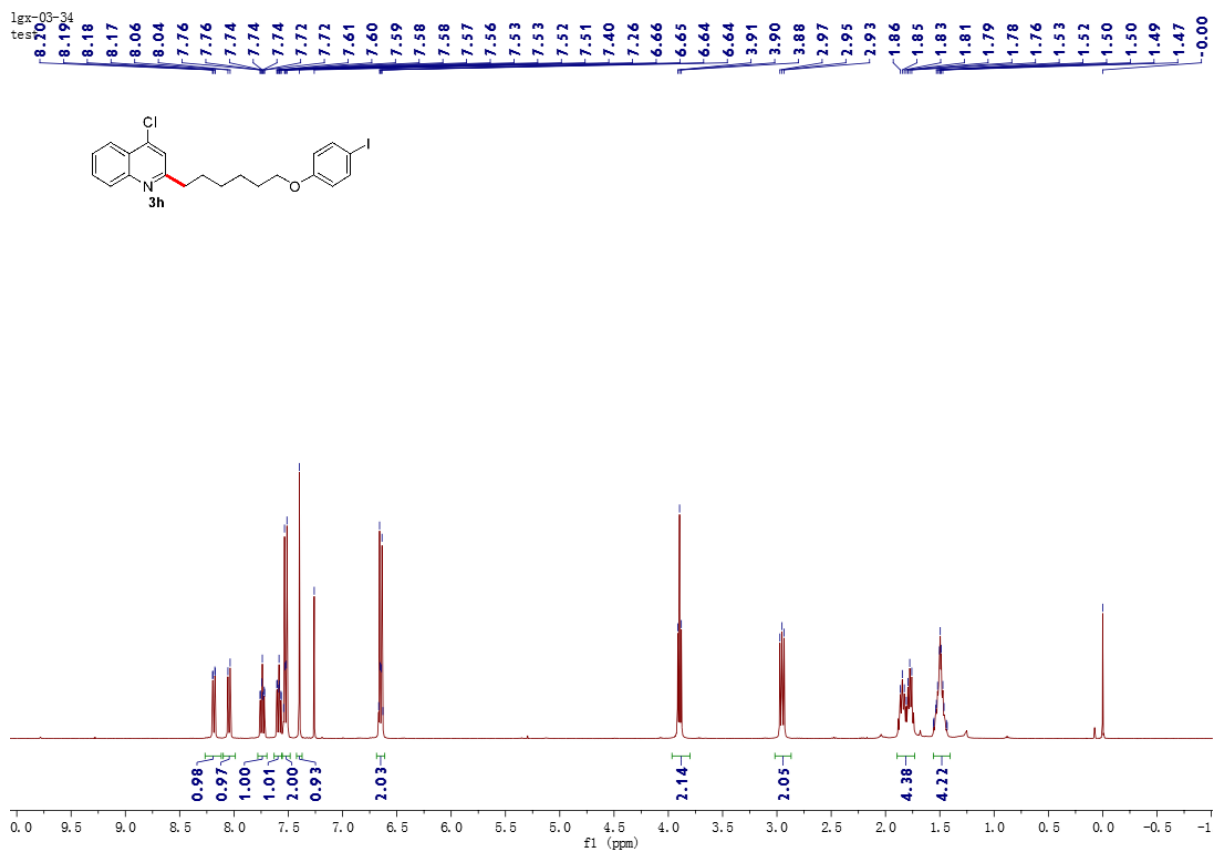

lgx-03-34  
test

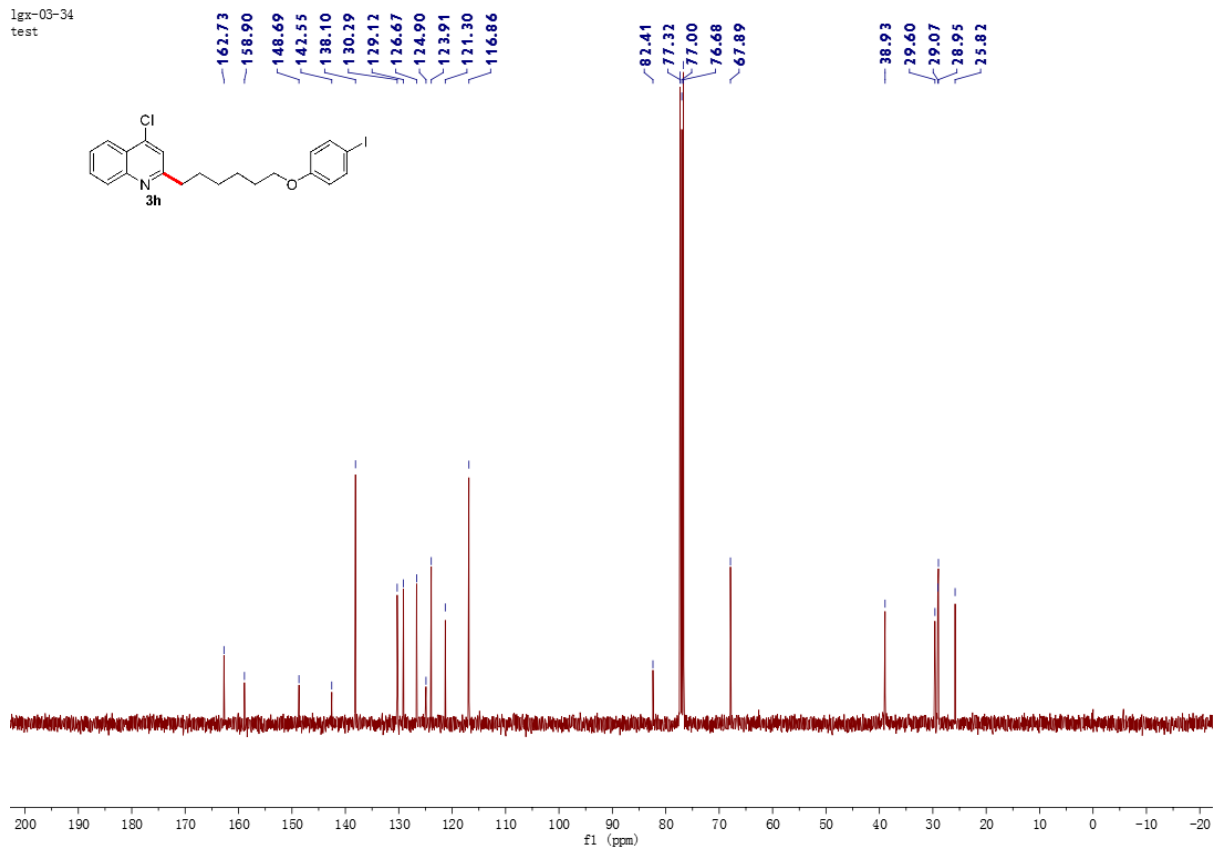

lgx-03-01-H  
PROTON

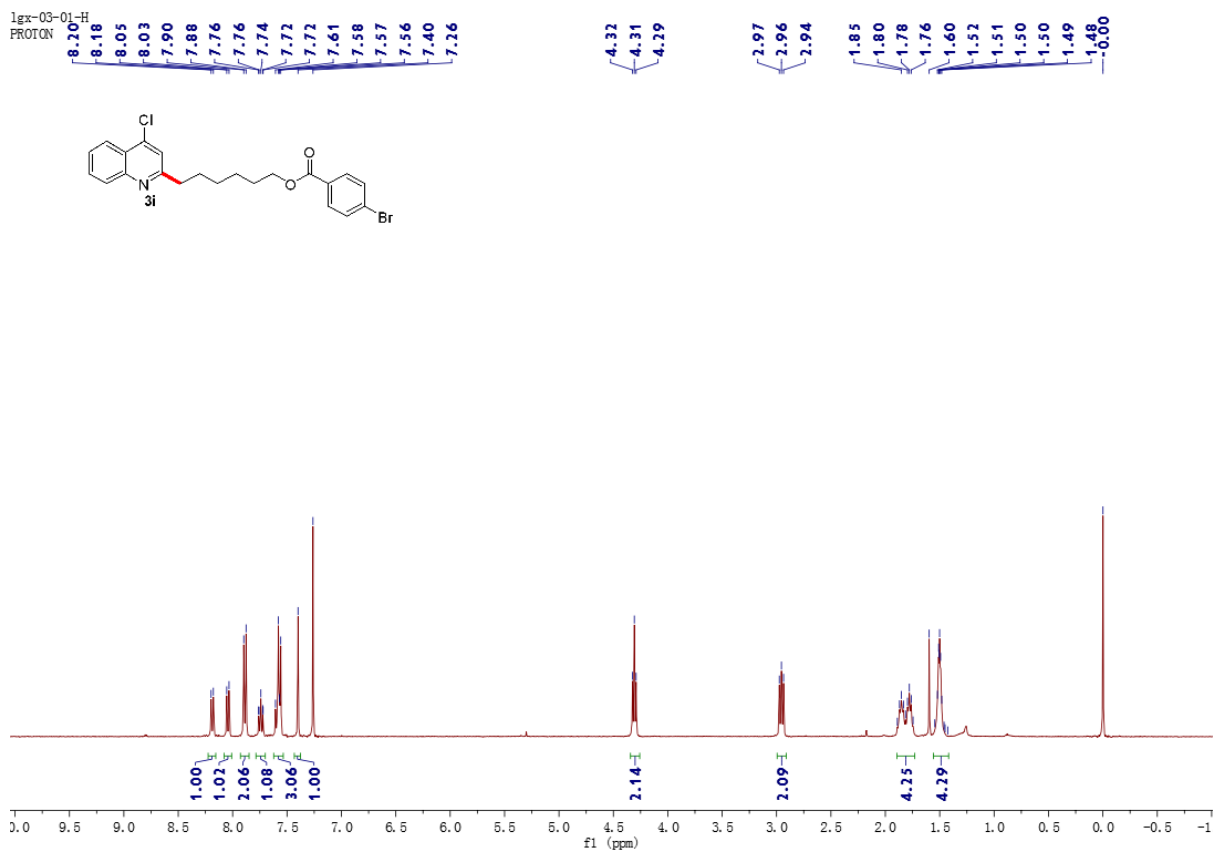

lgx-03-01-C  
Cl3CPD

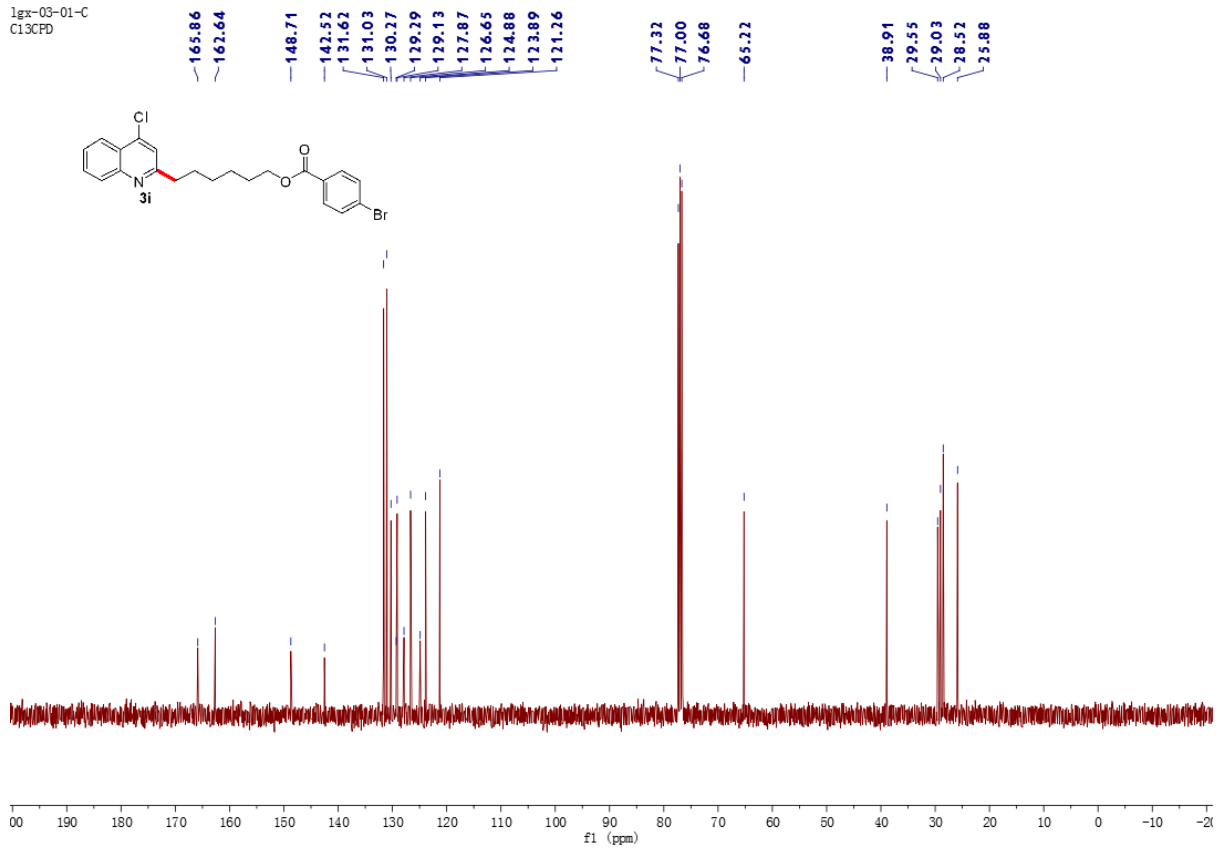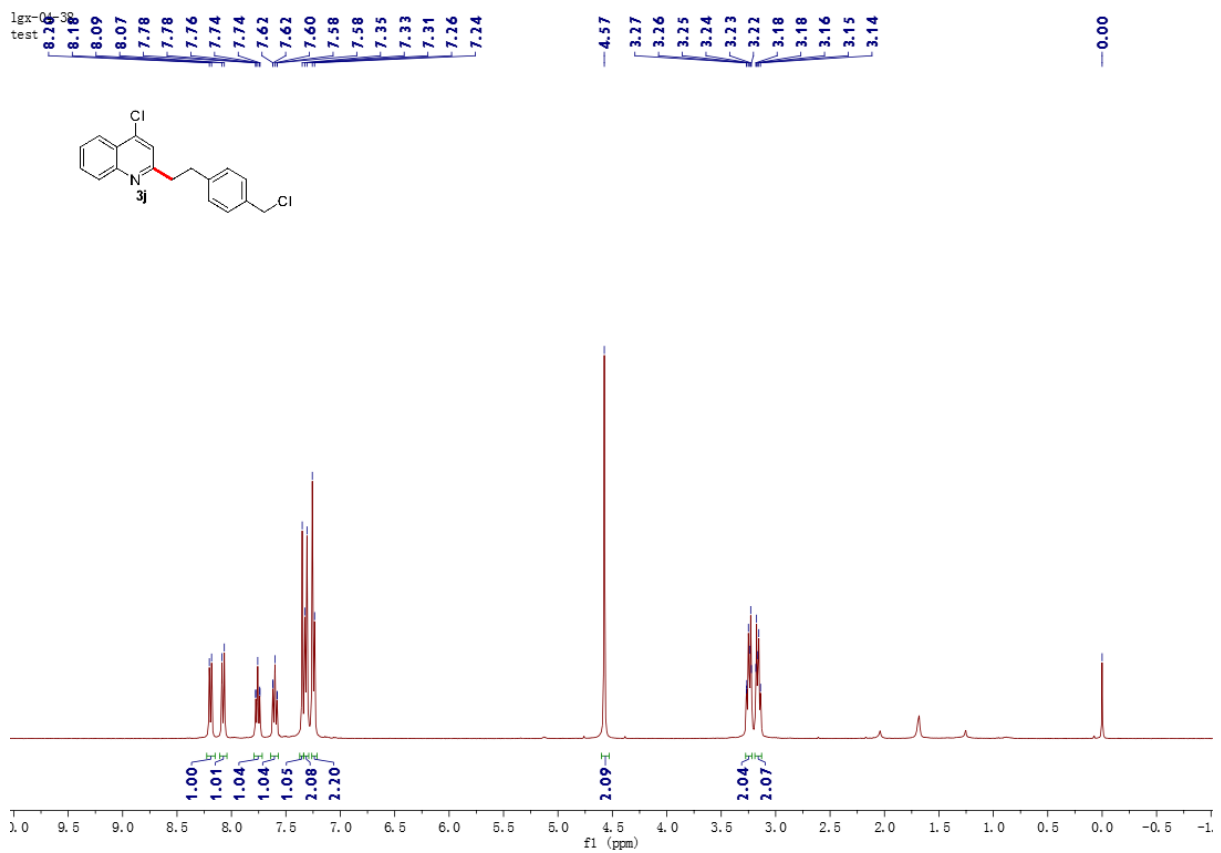

lgx-04-38  
test

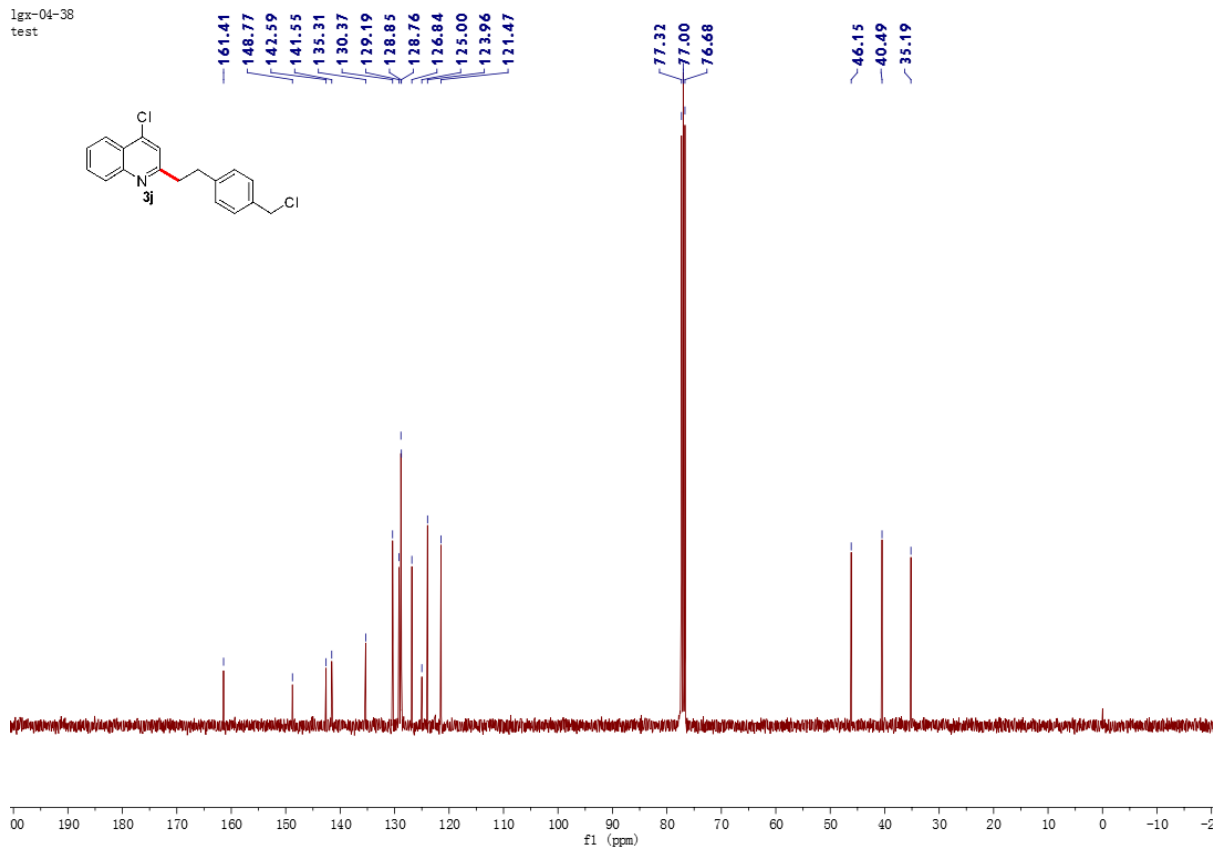

lgx-03-72-C  
PROTO

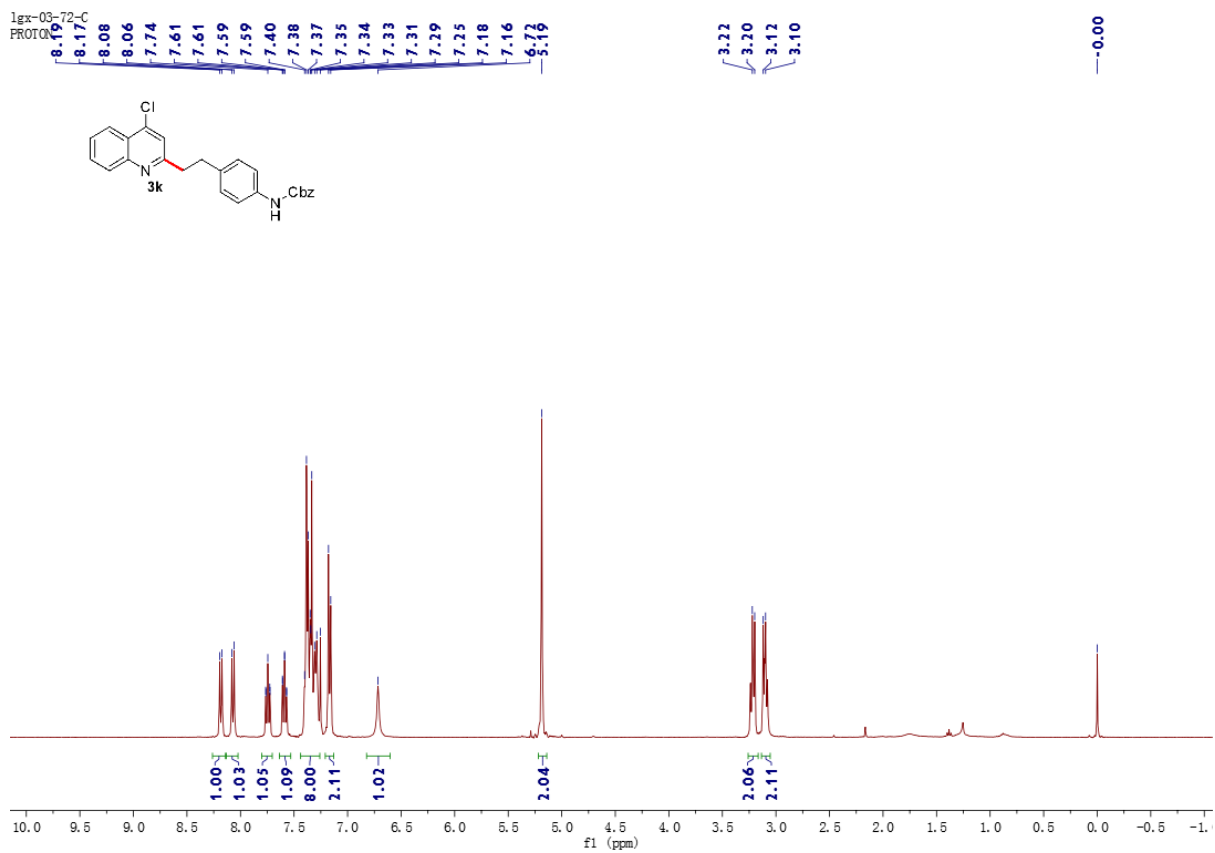

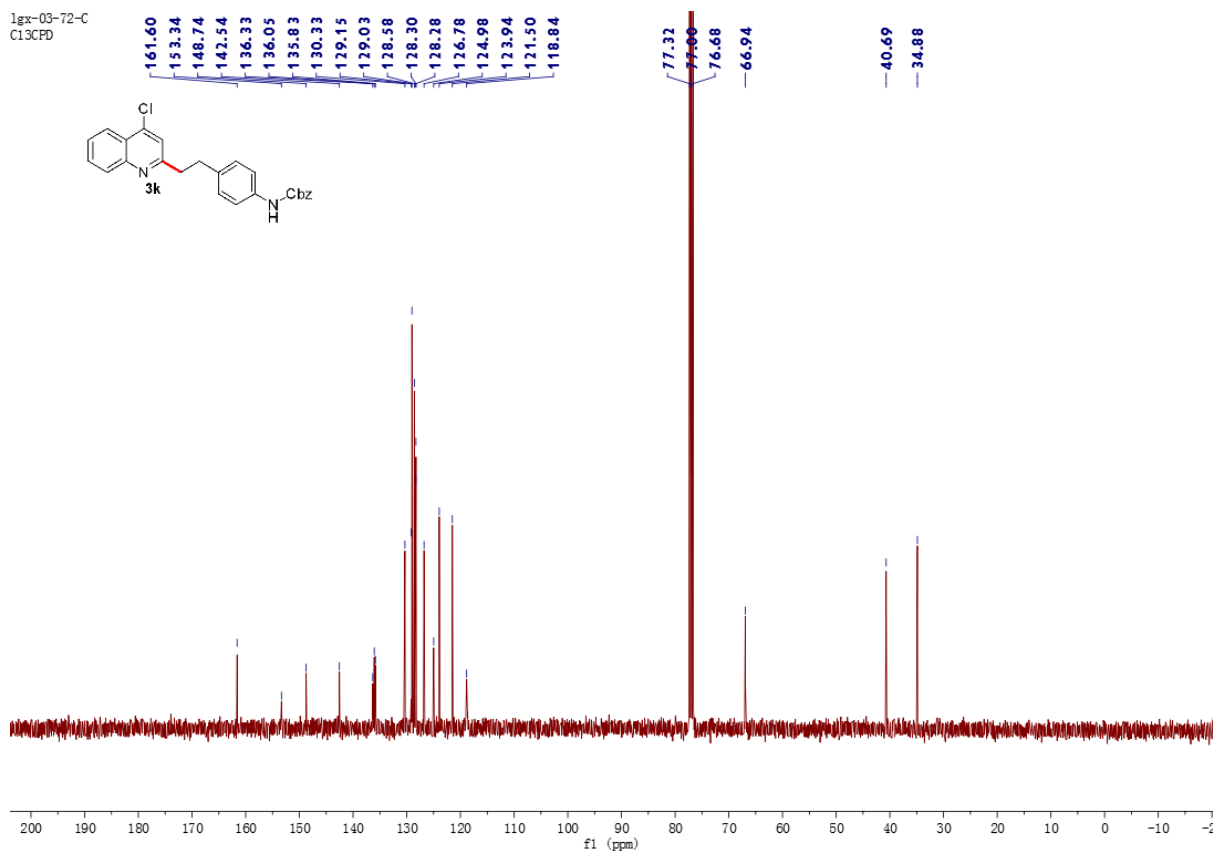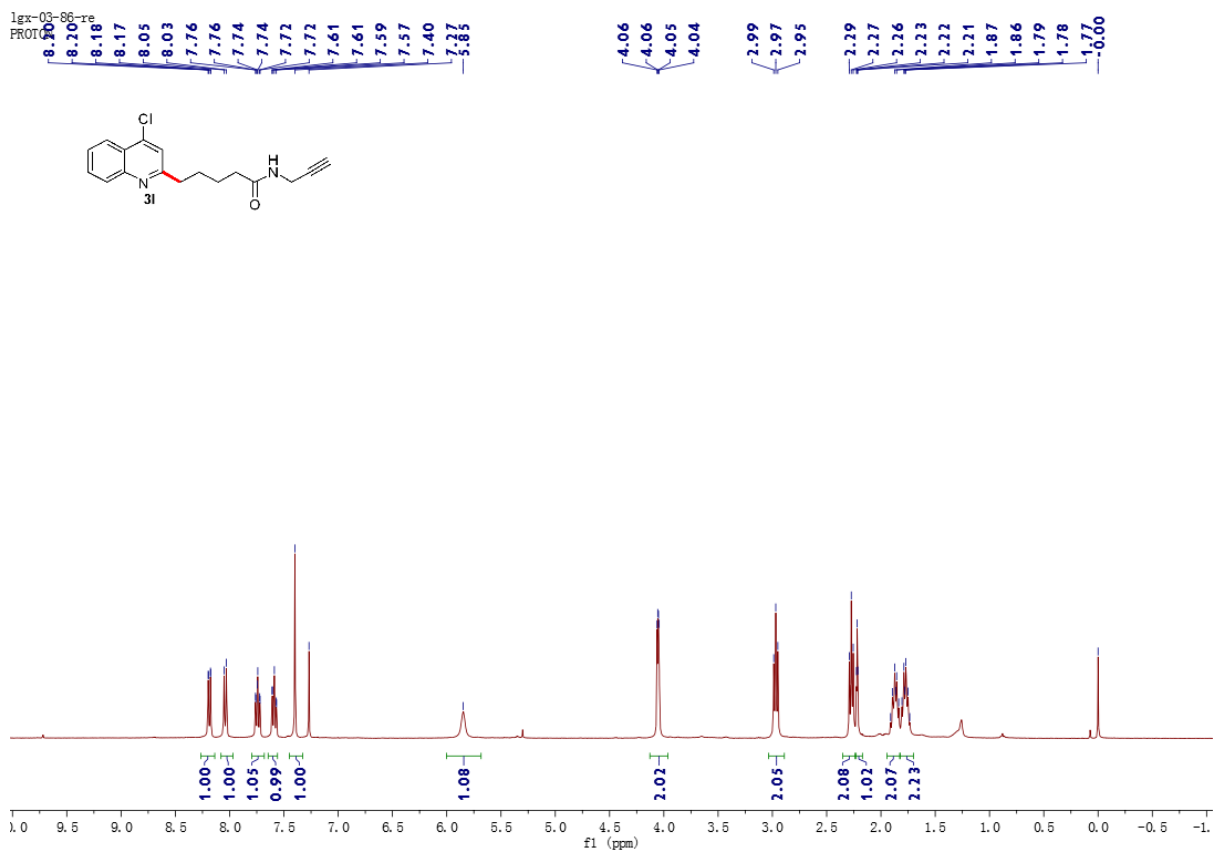

1gx-03-86-re  
Cl3CPD

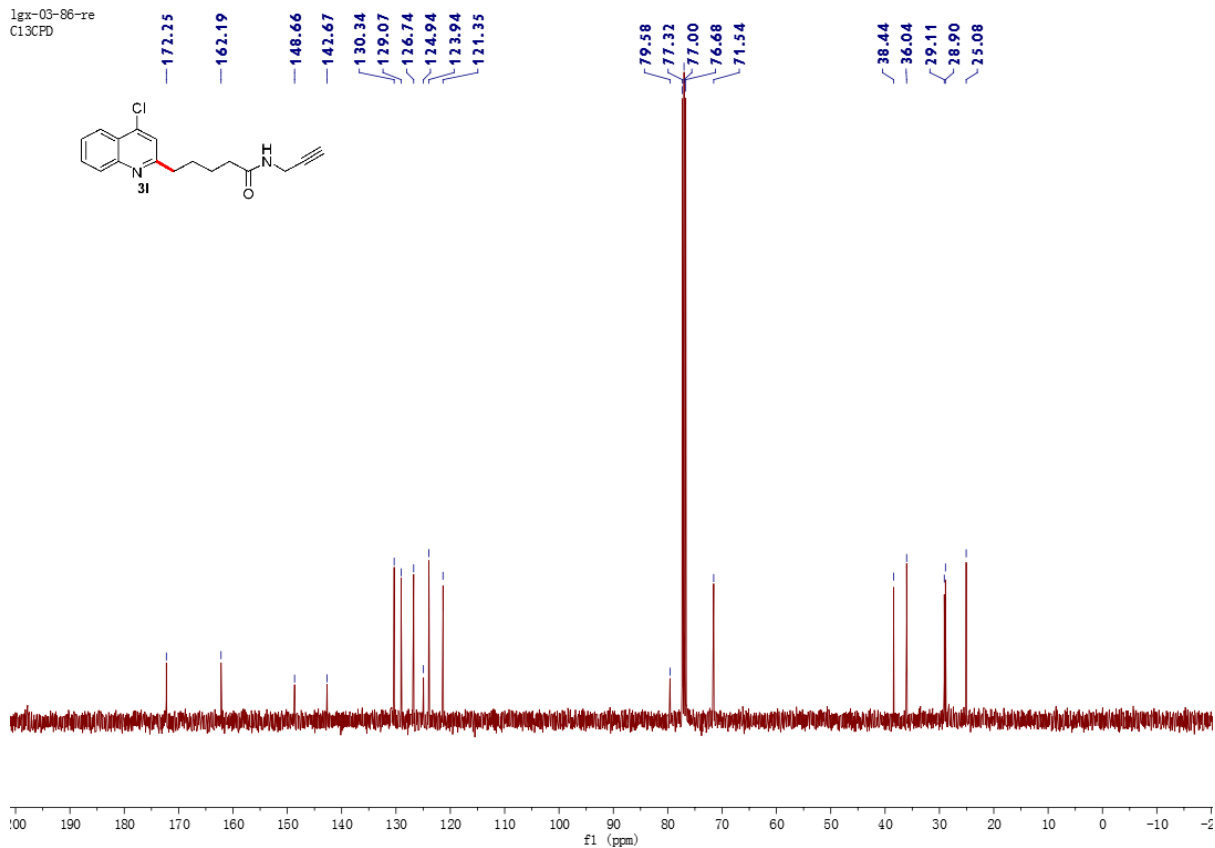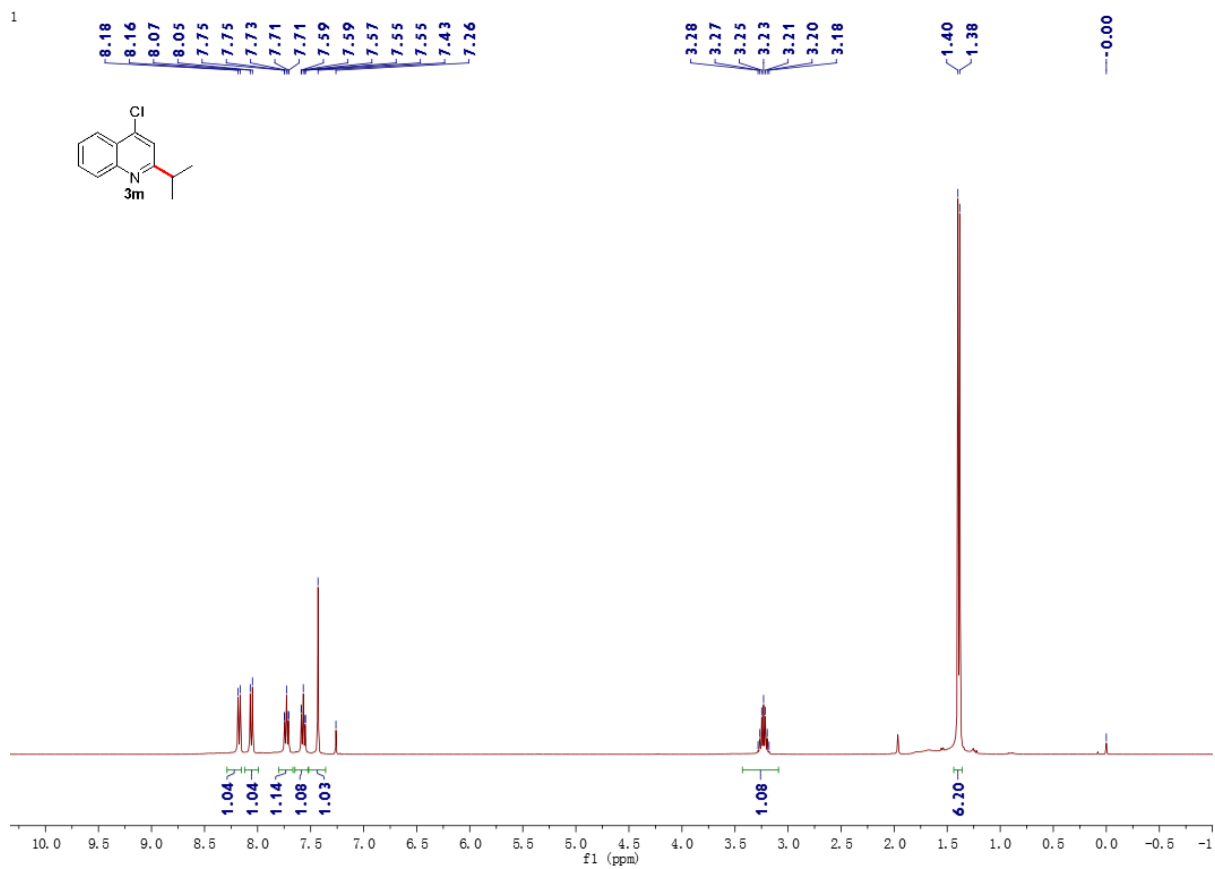

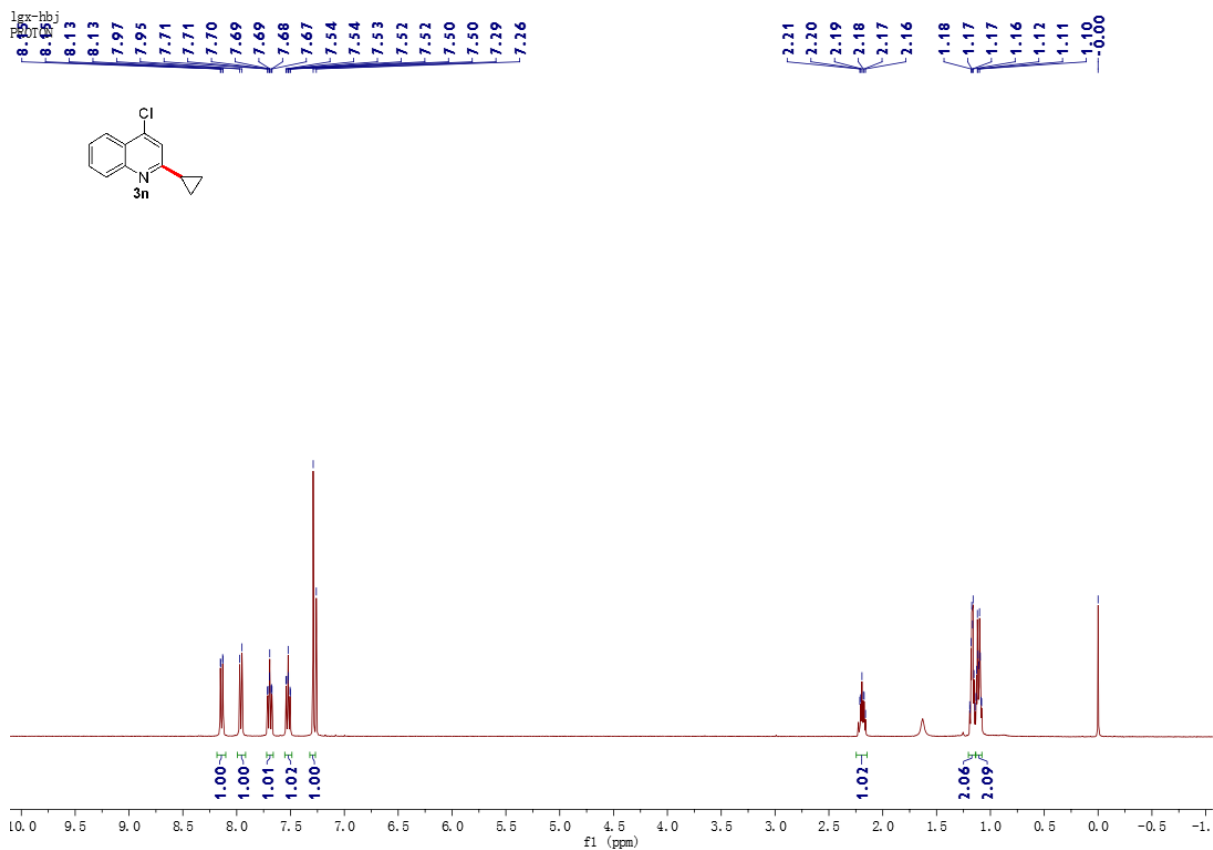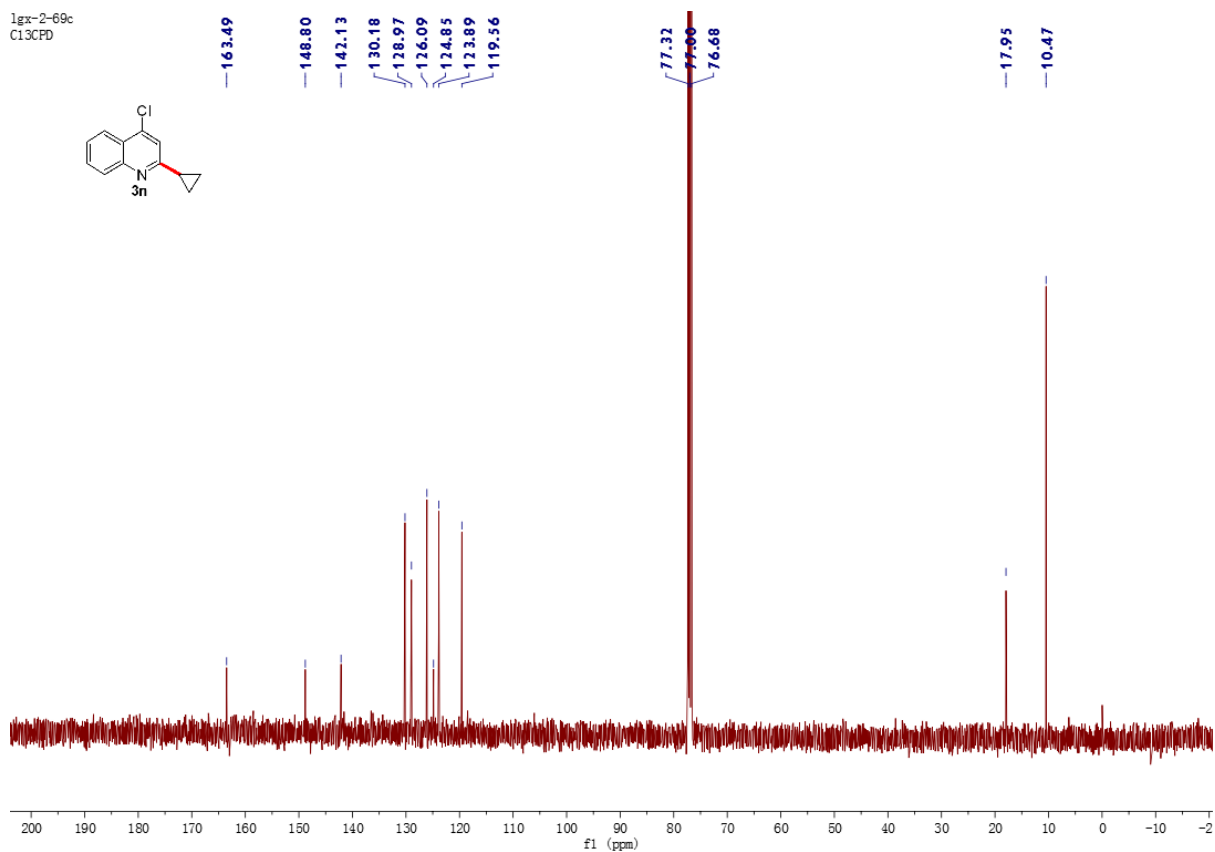

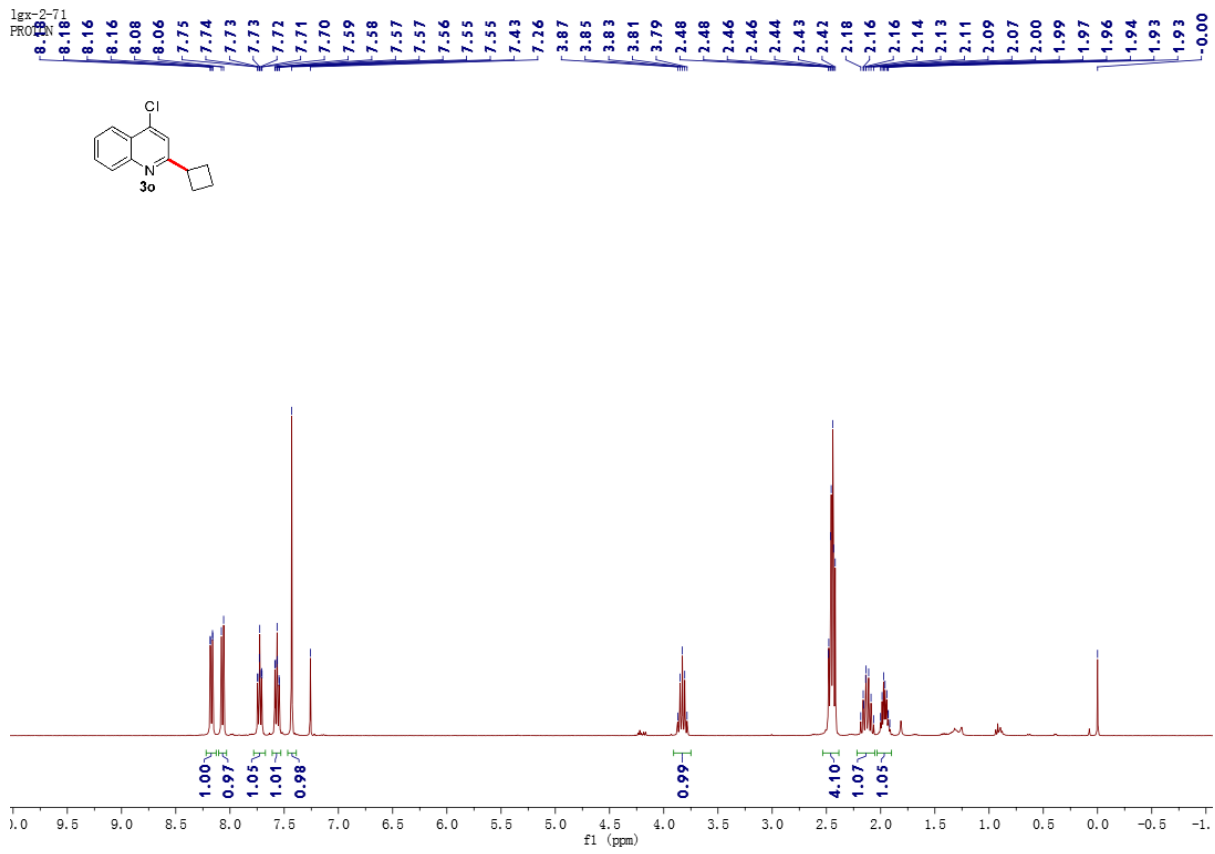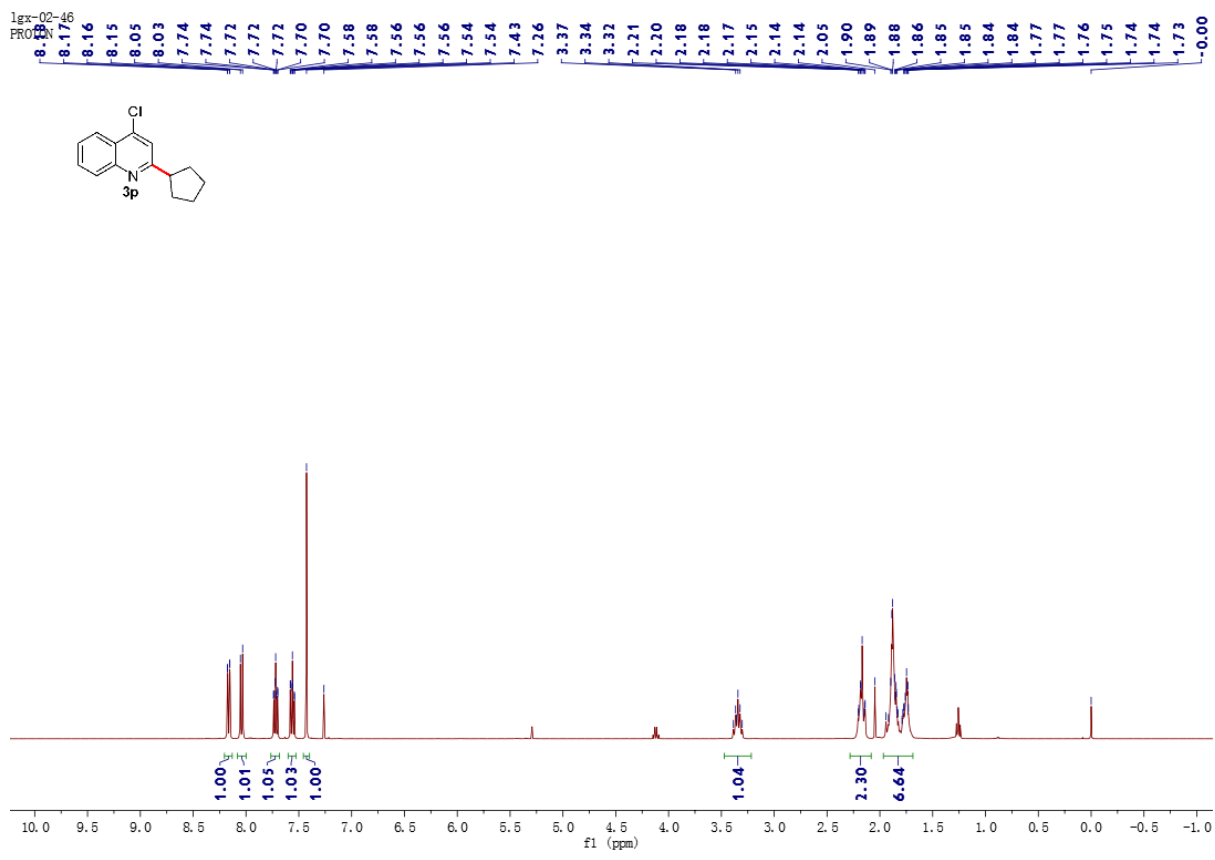



1gx-02-46  
Cl3CPD

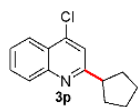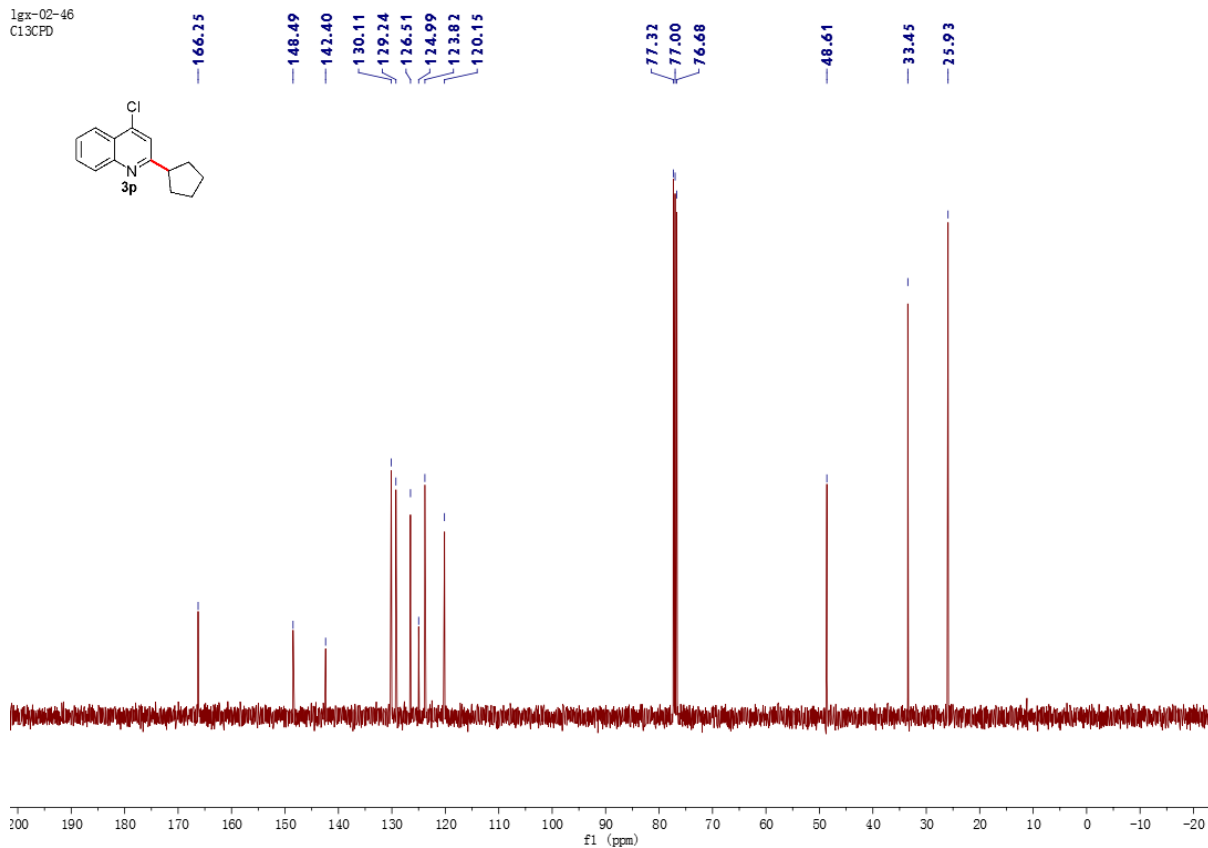

1gx-02-43  
PRO

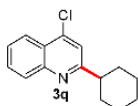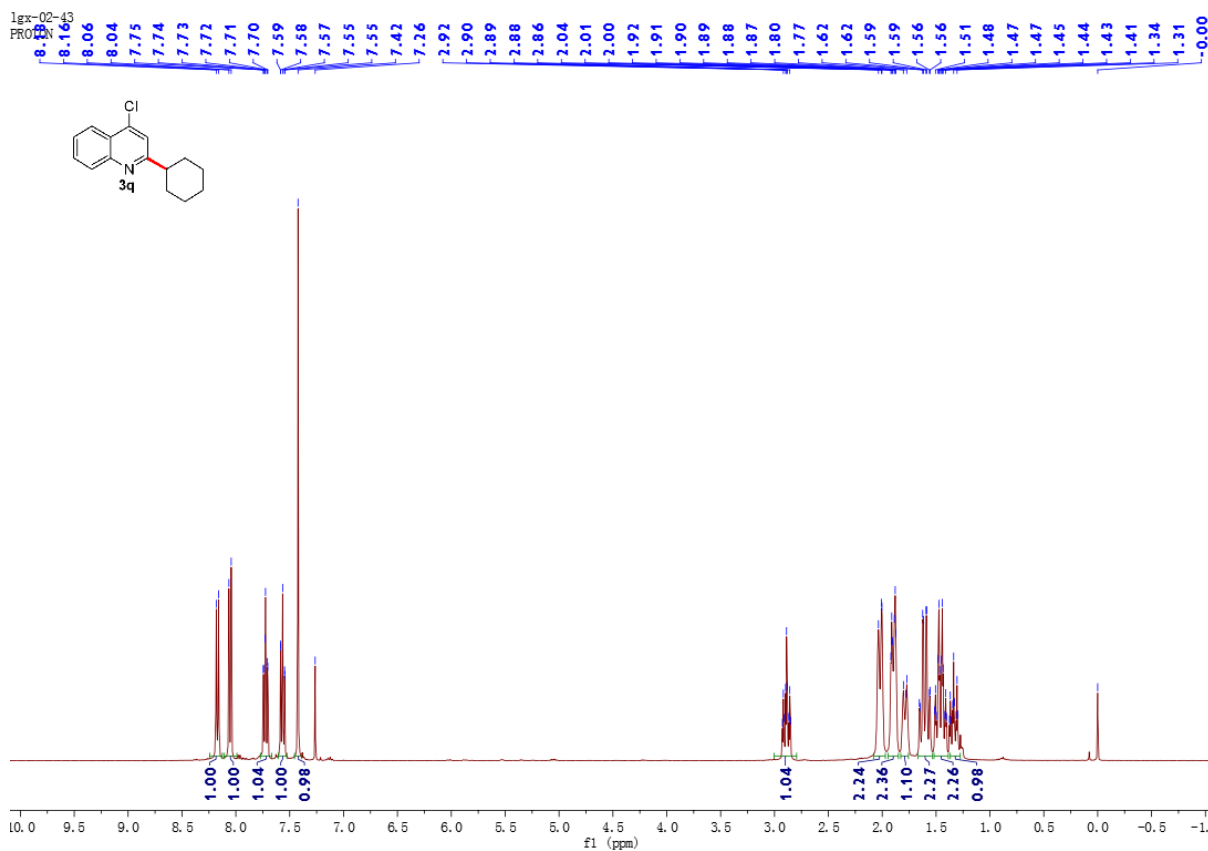

1gx-02-43  
Cl3CPD

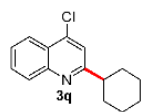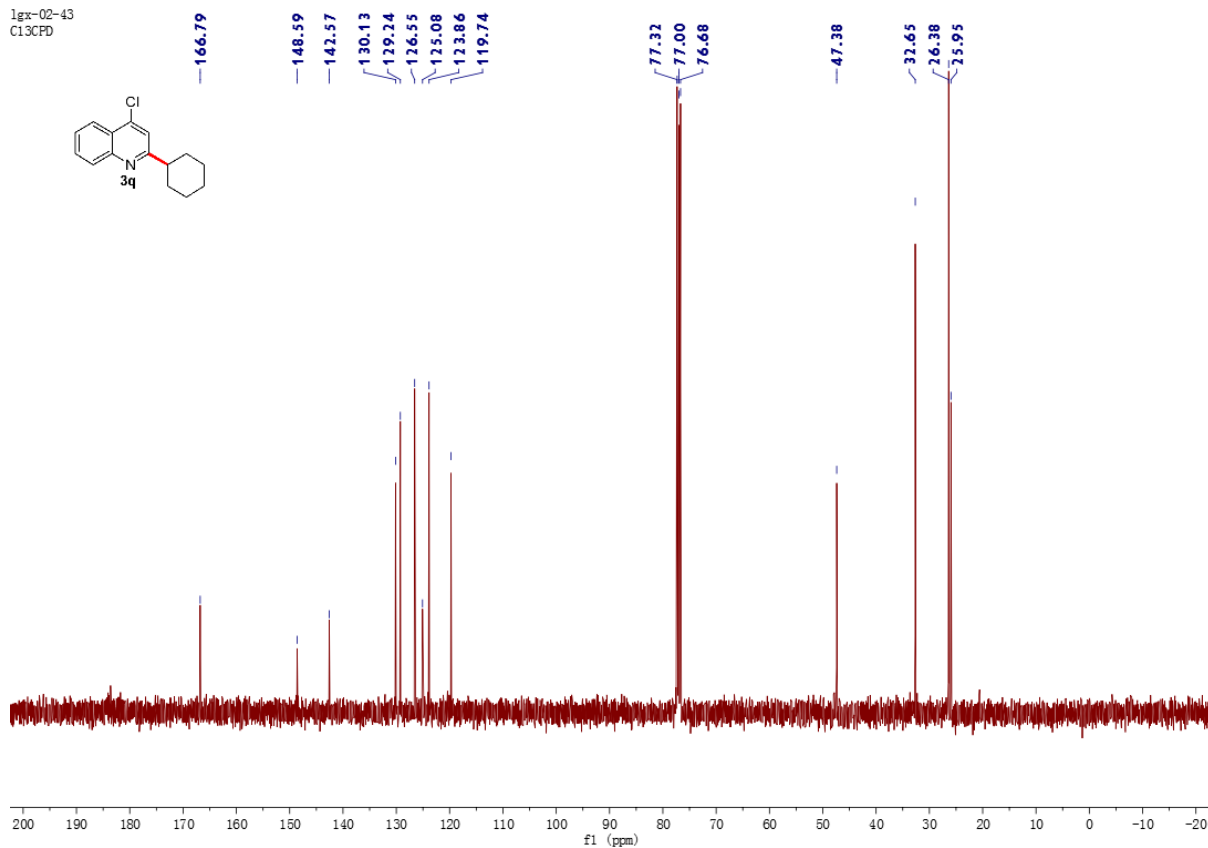

1gx-04-61h  
PRO

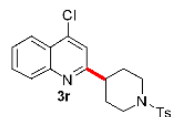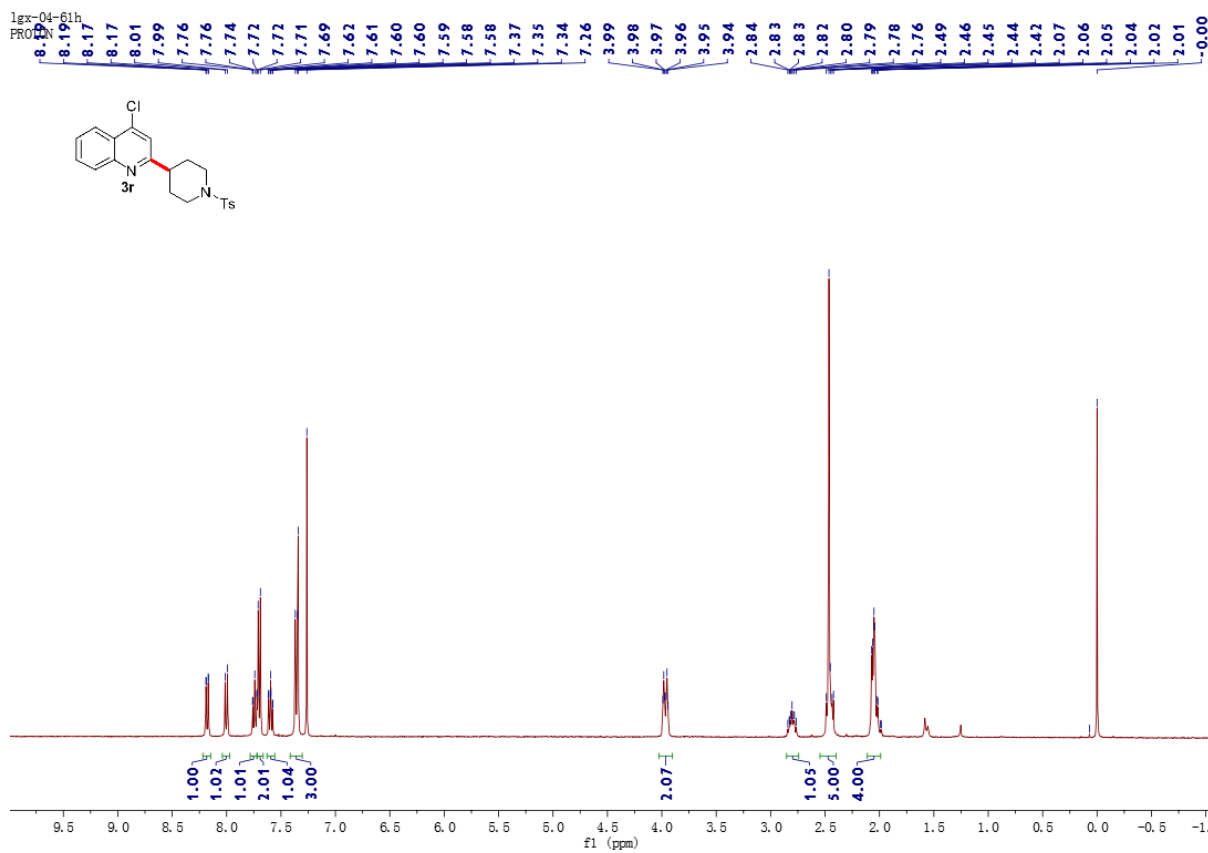

1gx-04-61 c  
Cl3CPD

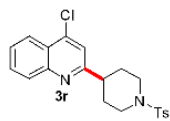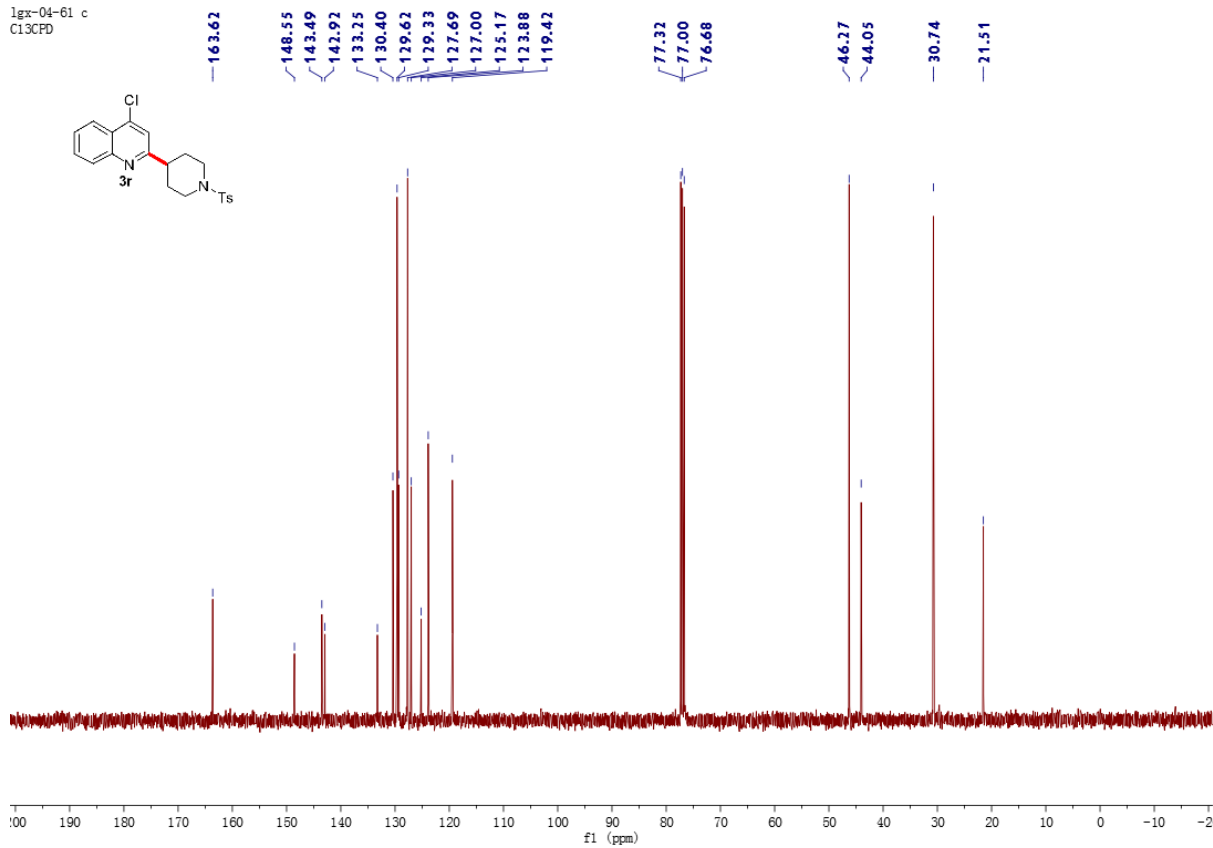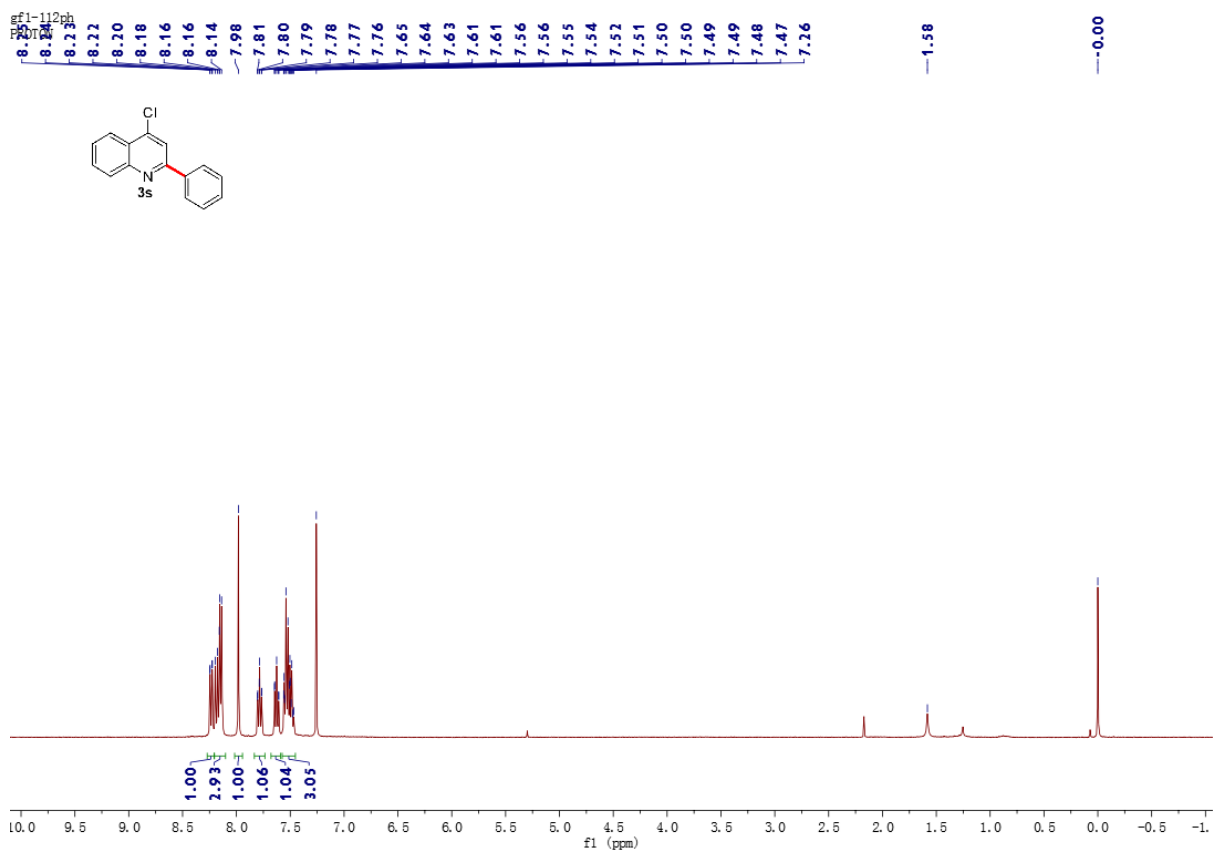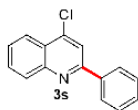

1gx-3-120-3  
PROTON

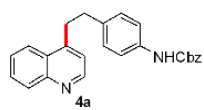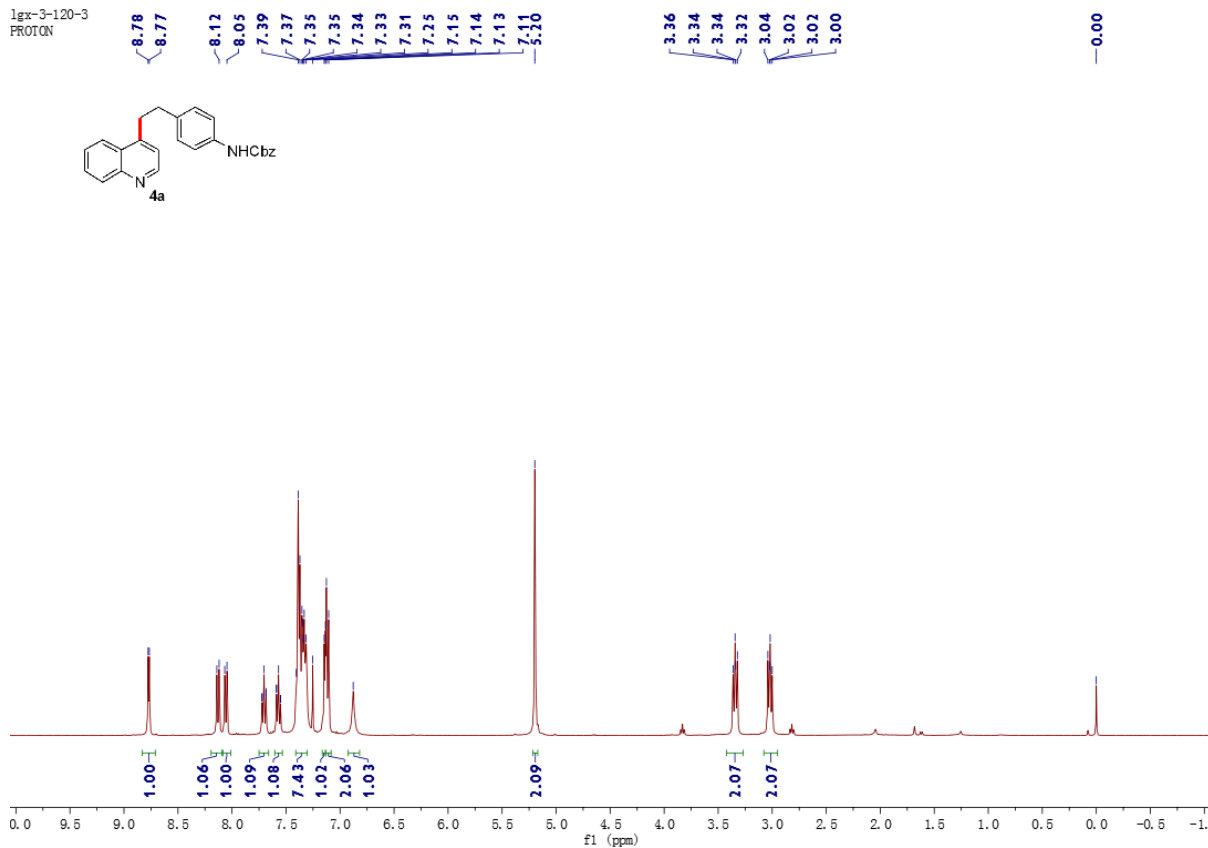

1gx-3-120-3  
C13CPD

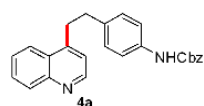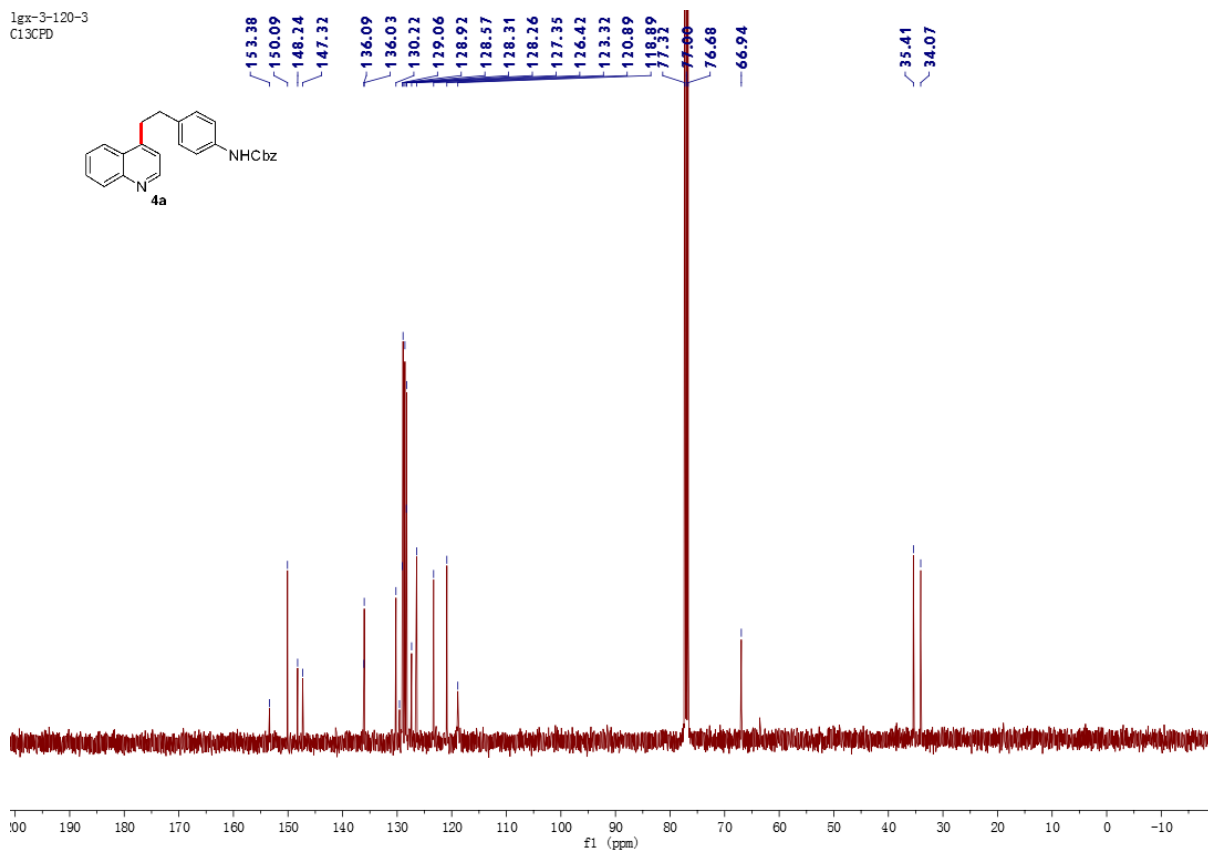

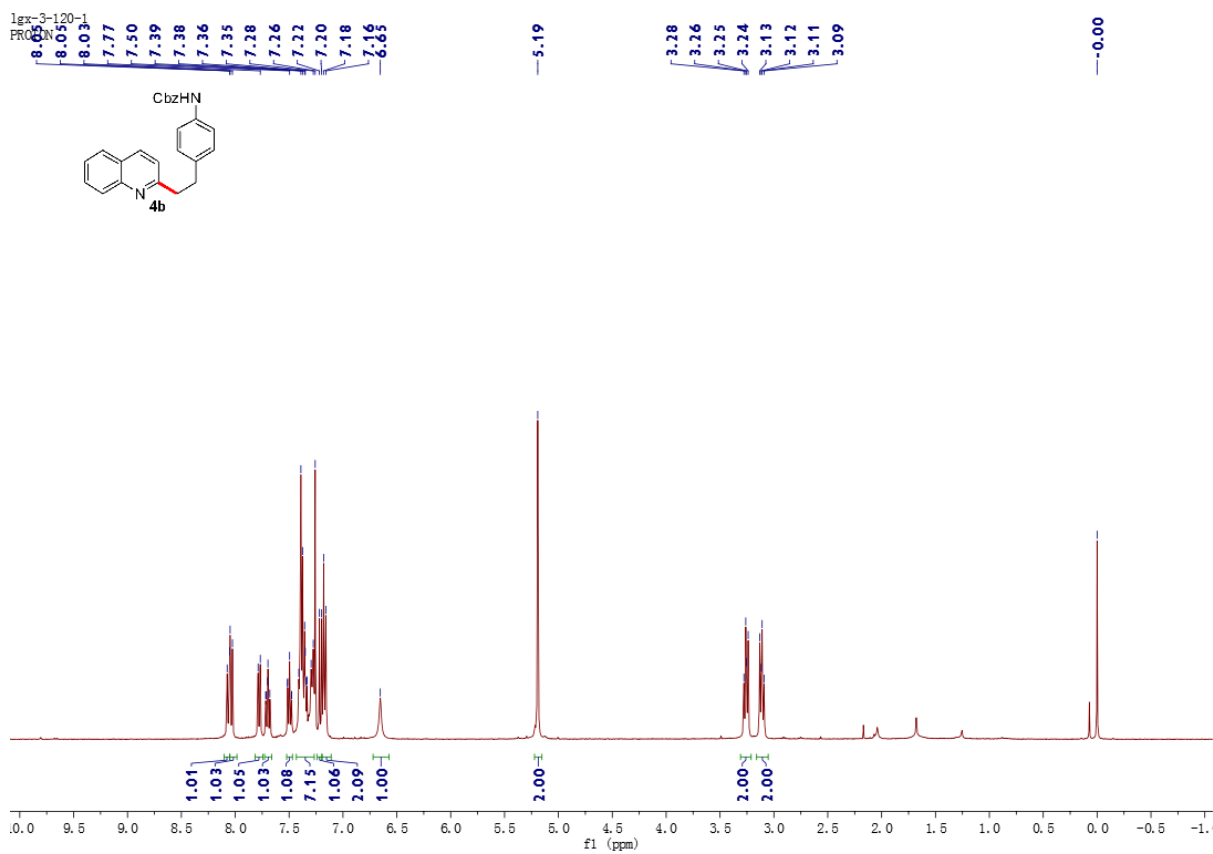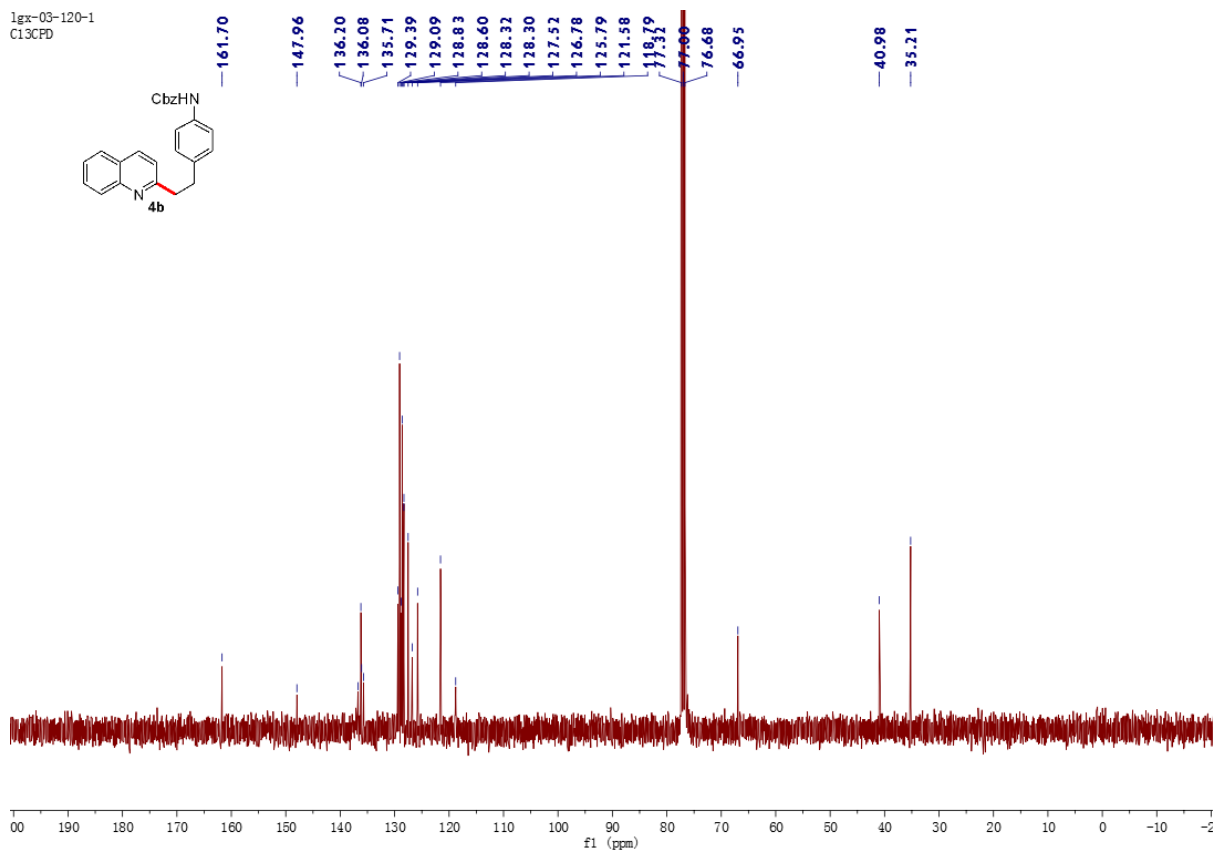

1gx-03-68  
PROTON

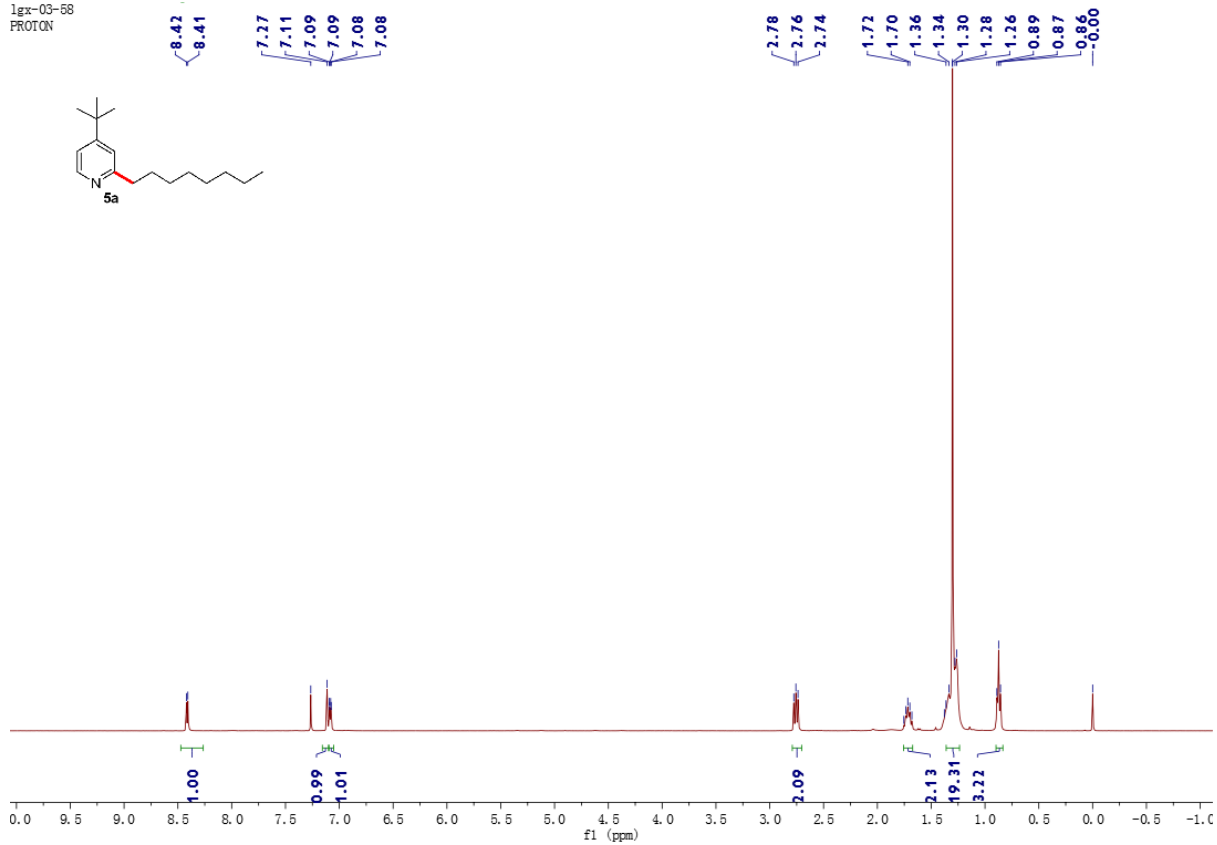

1gx-03-68  
C13CPD

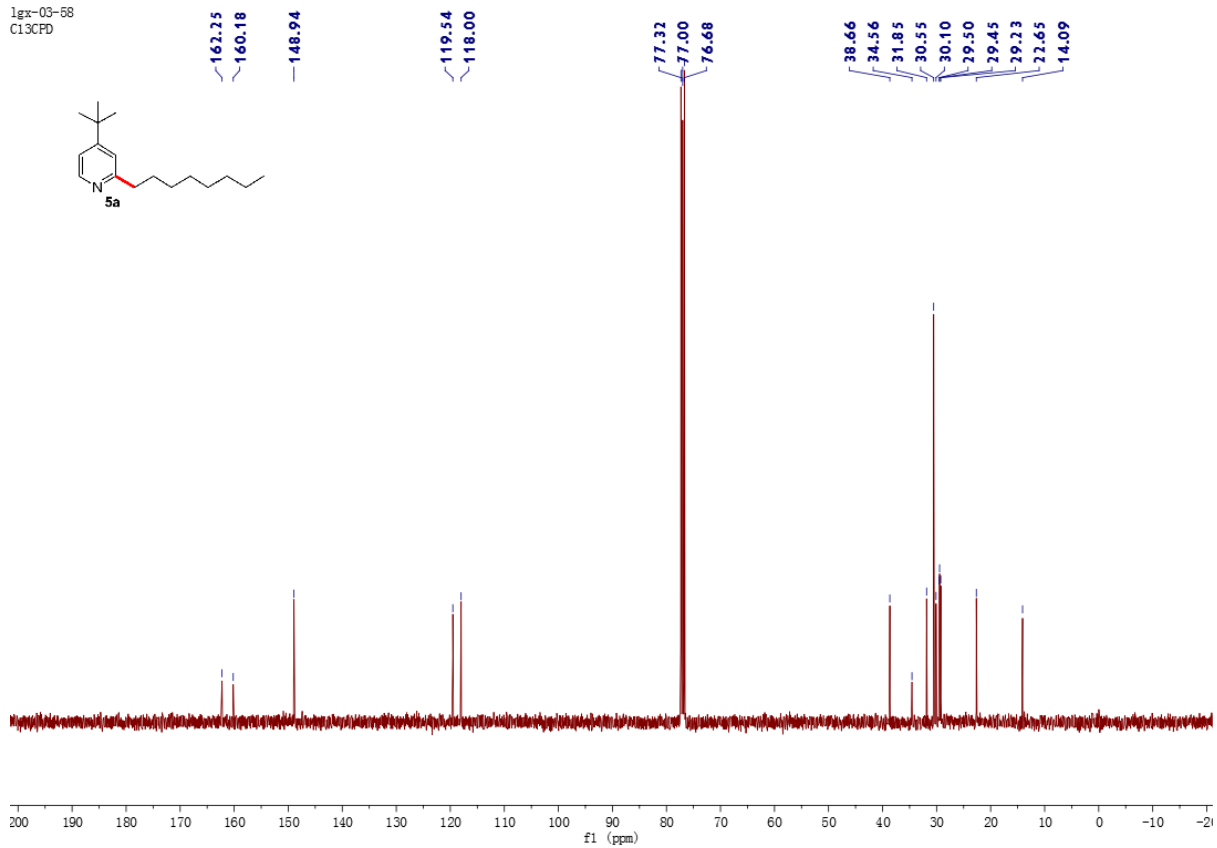

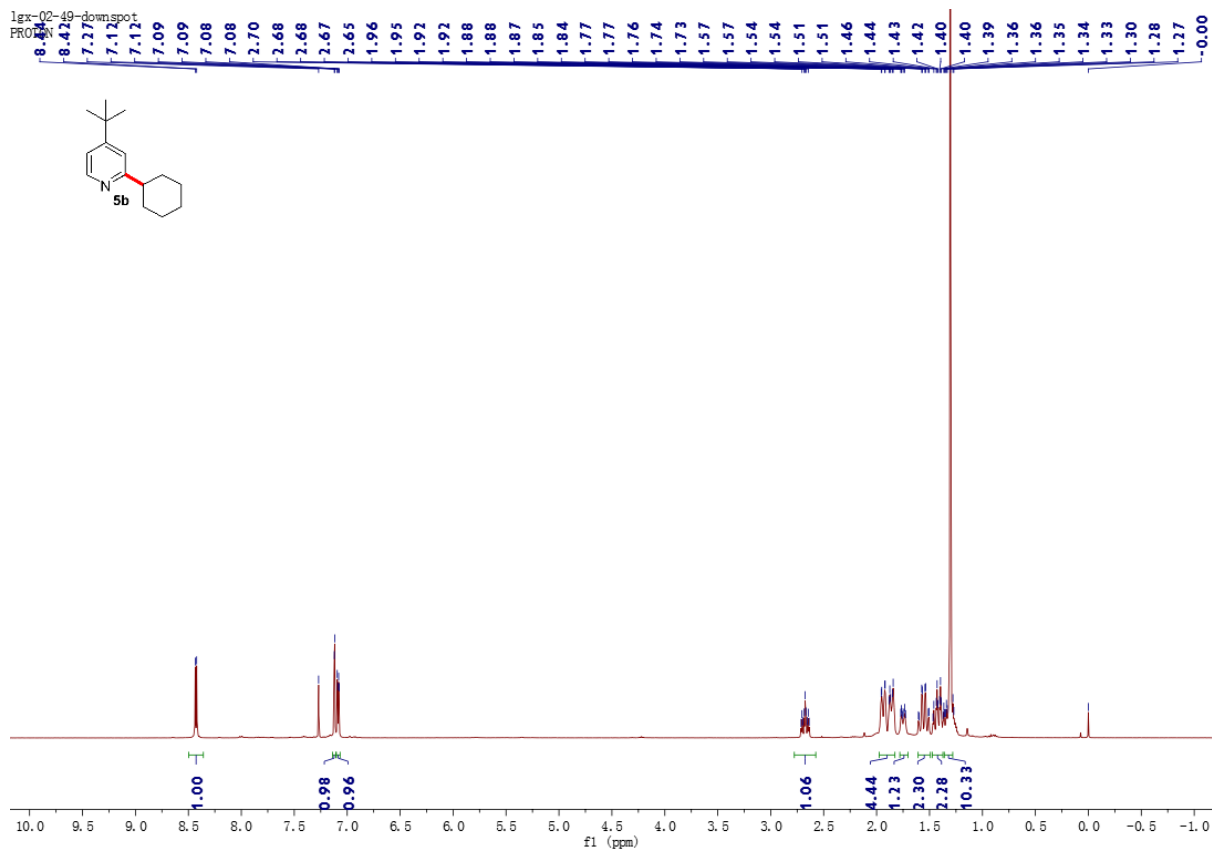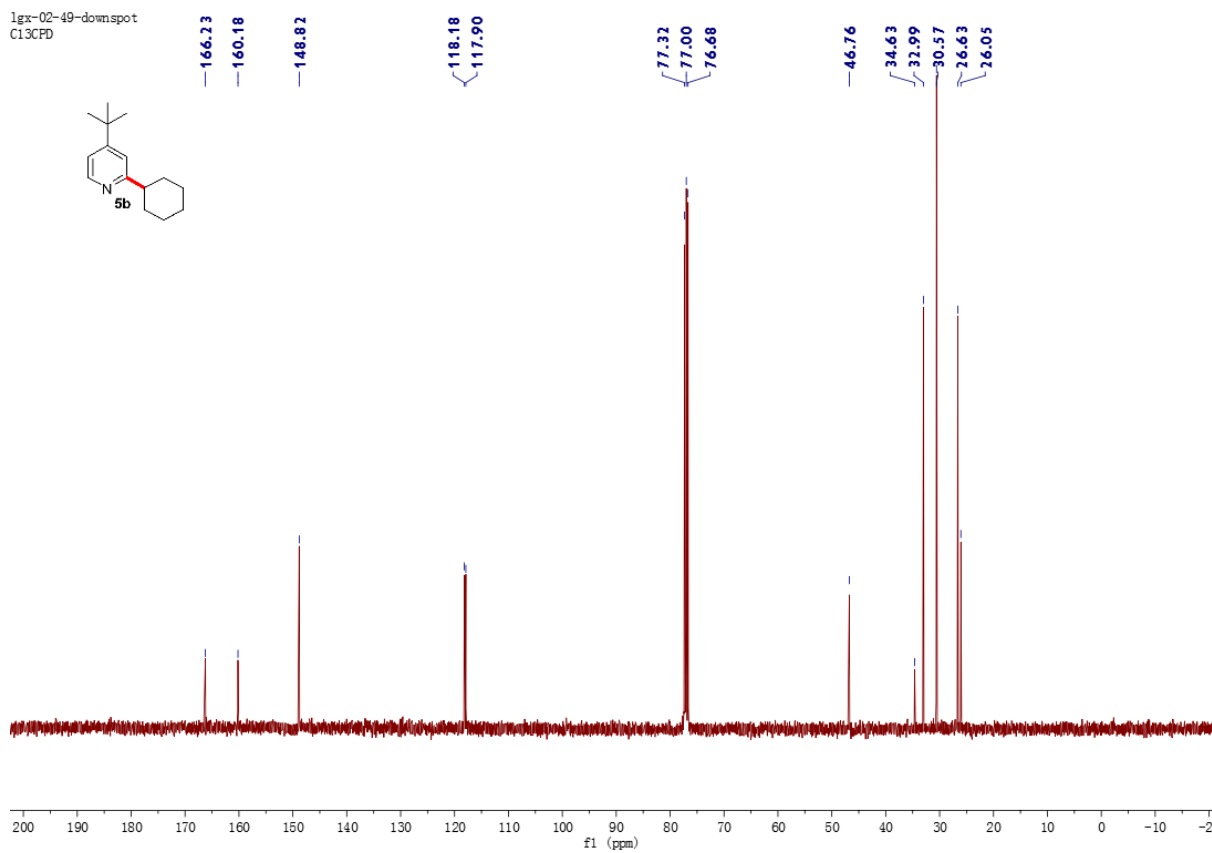

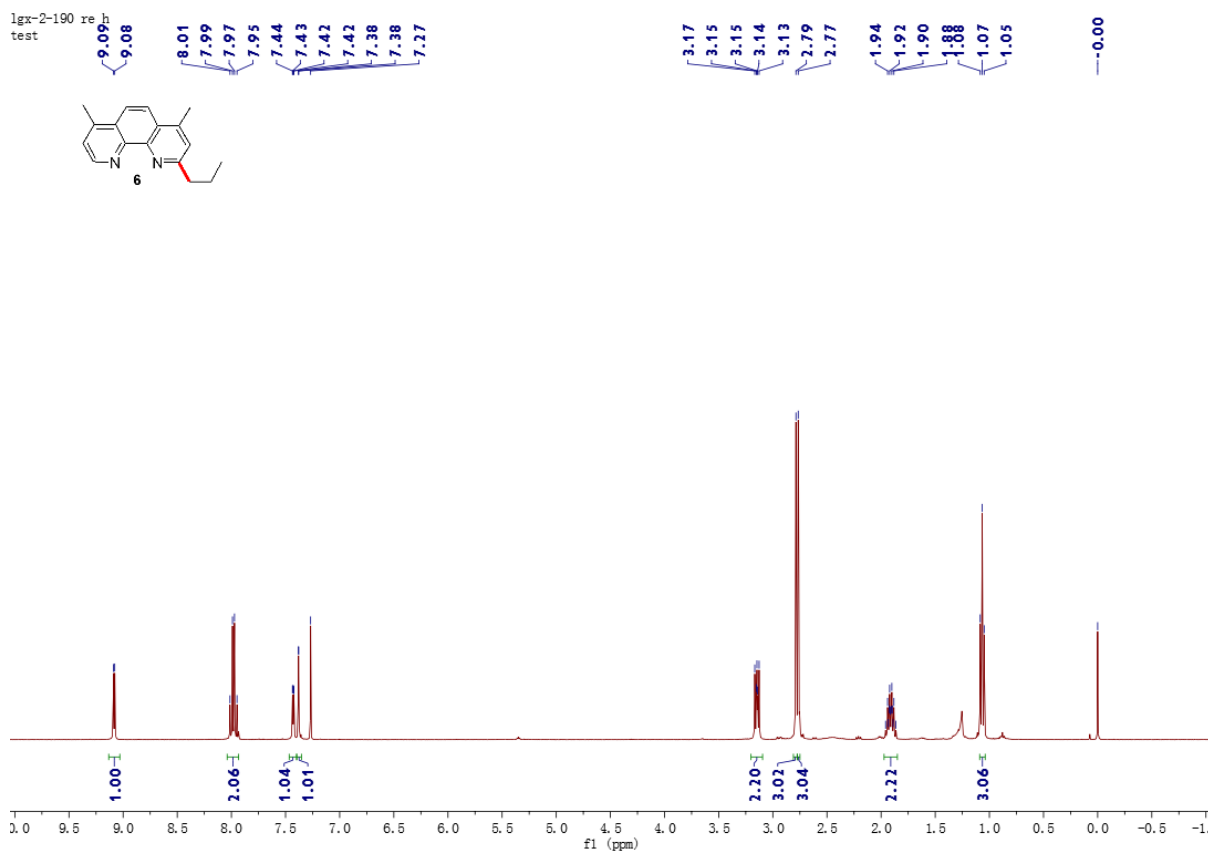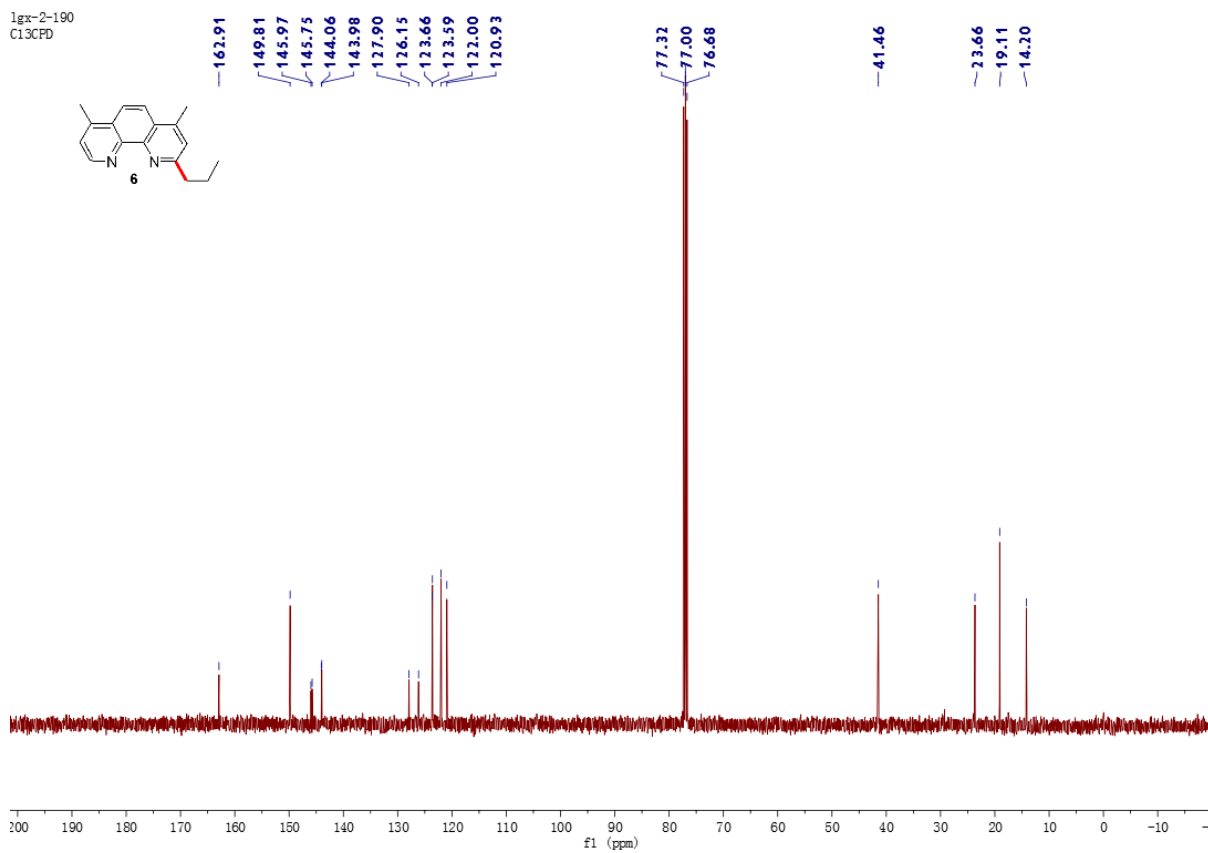



1gx-02-101-H  
PROTON

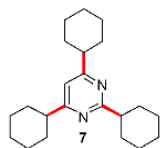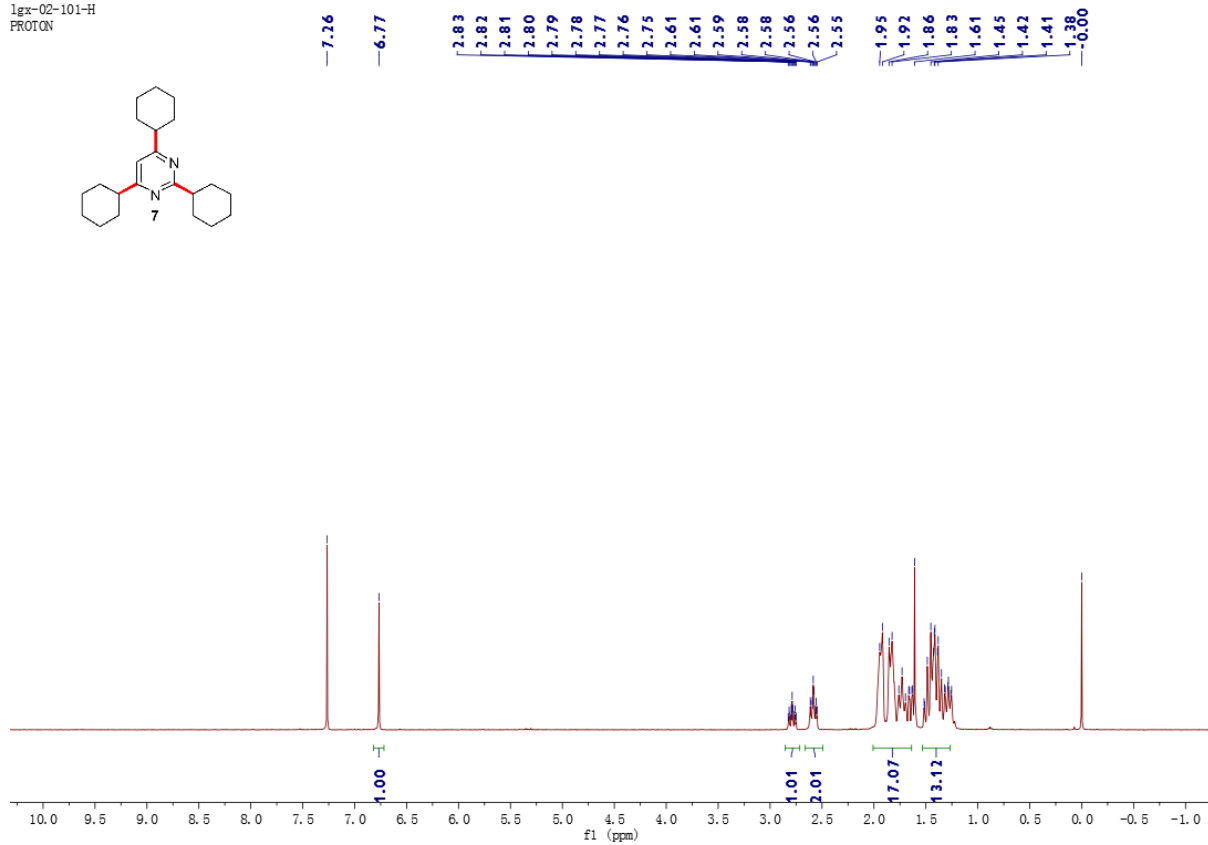

1gx-02-60-upspot  
PROTON

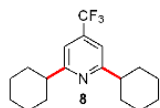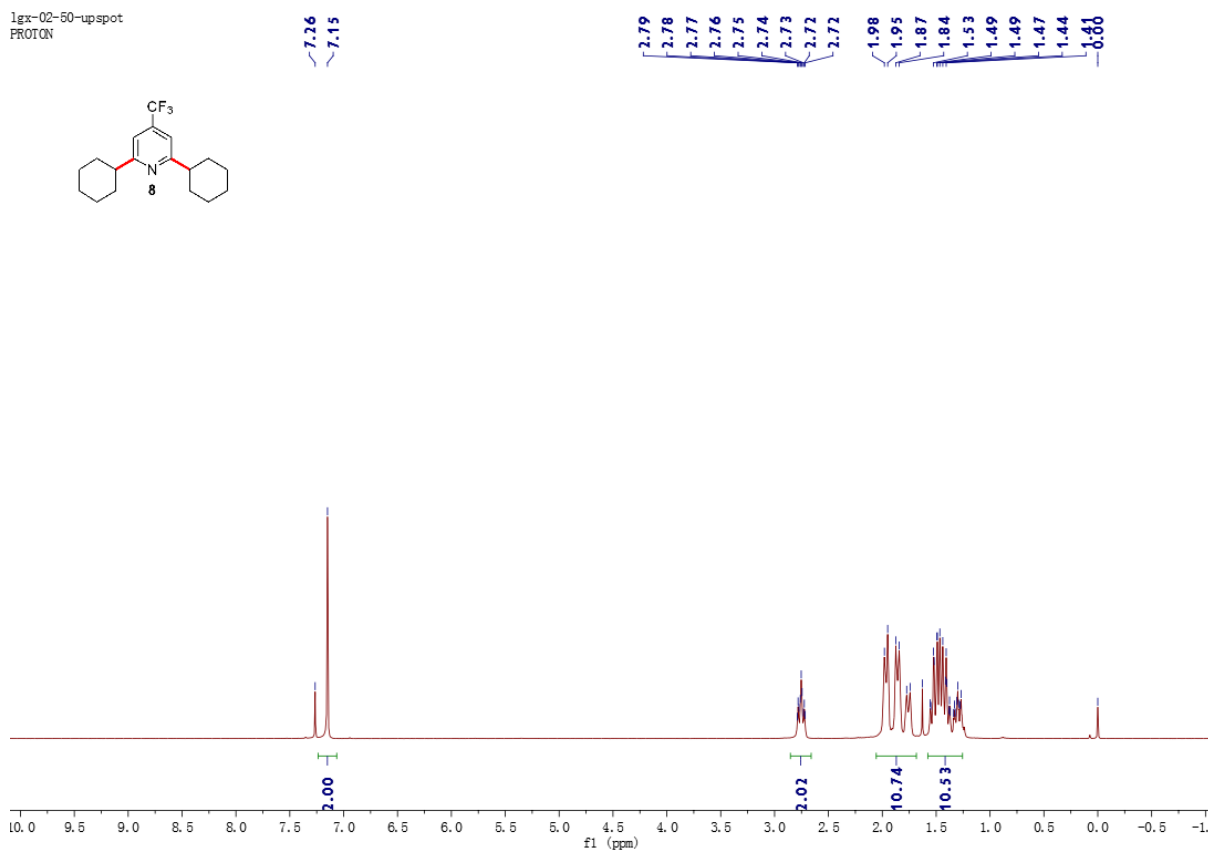

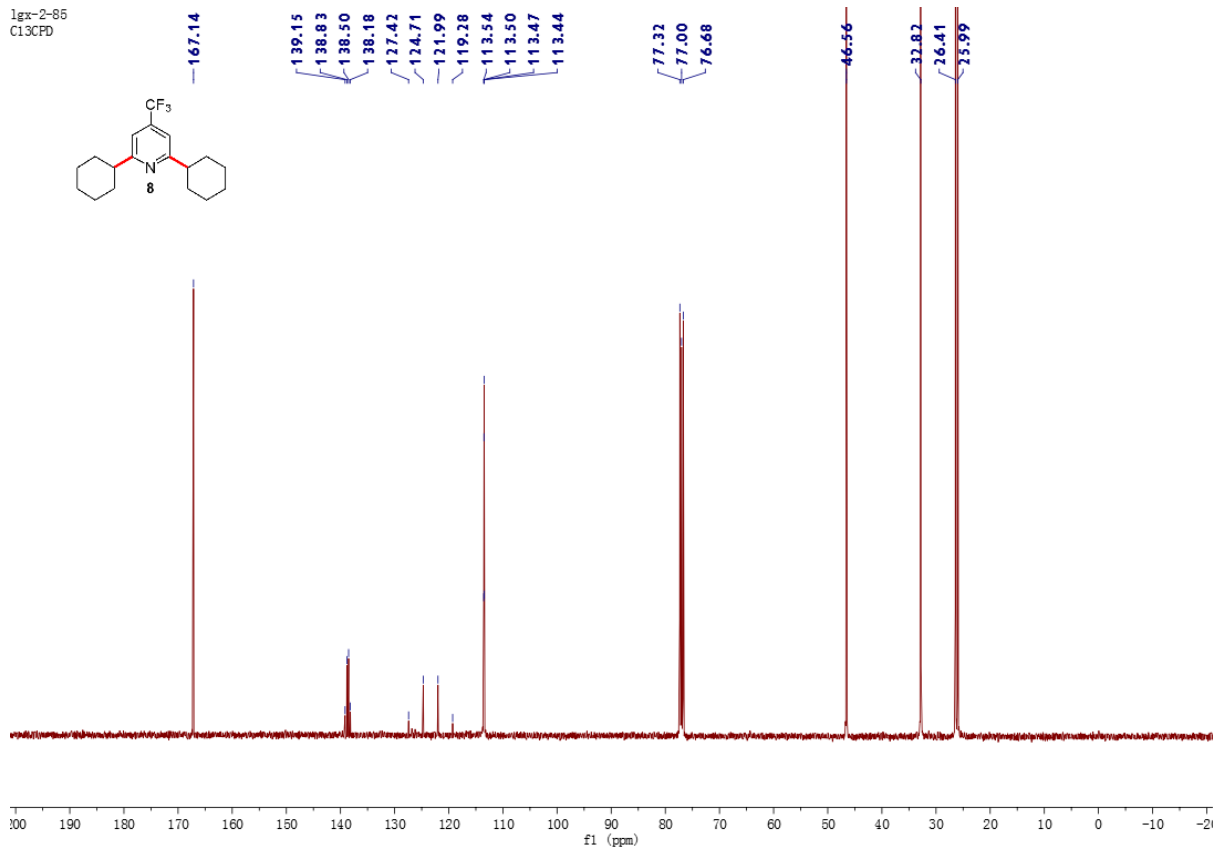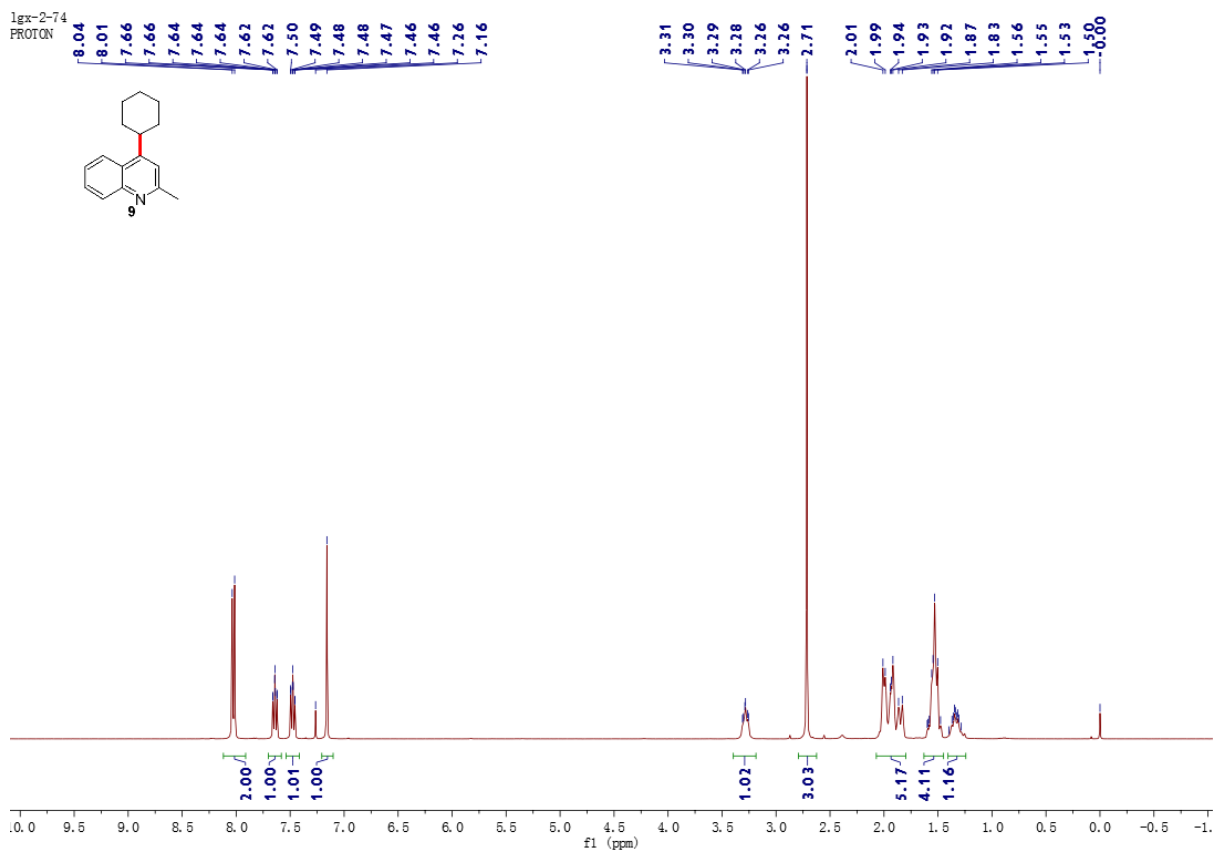

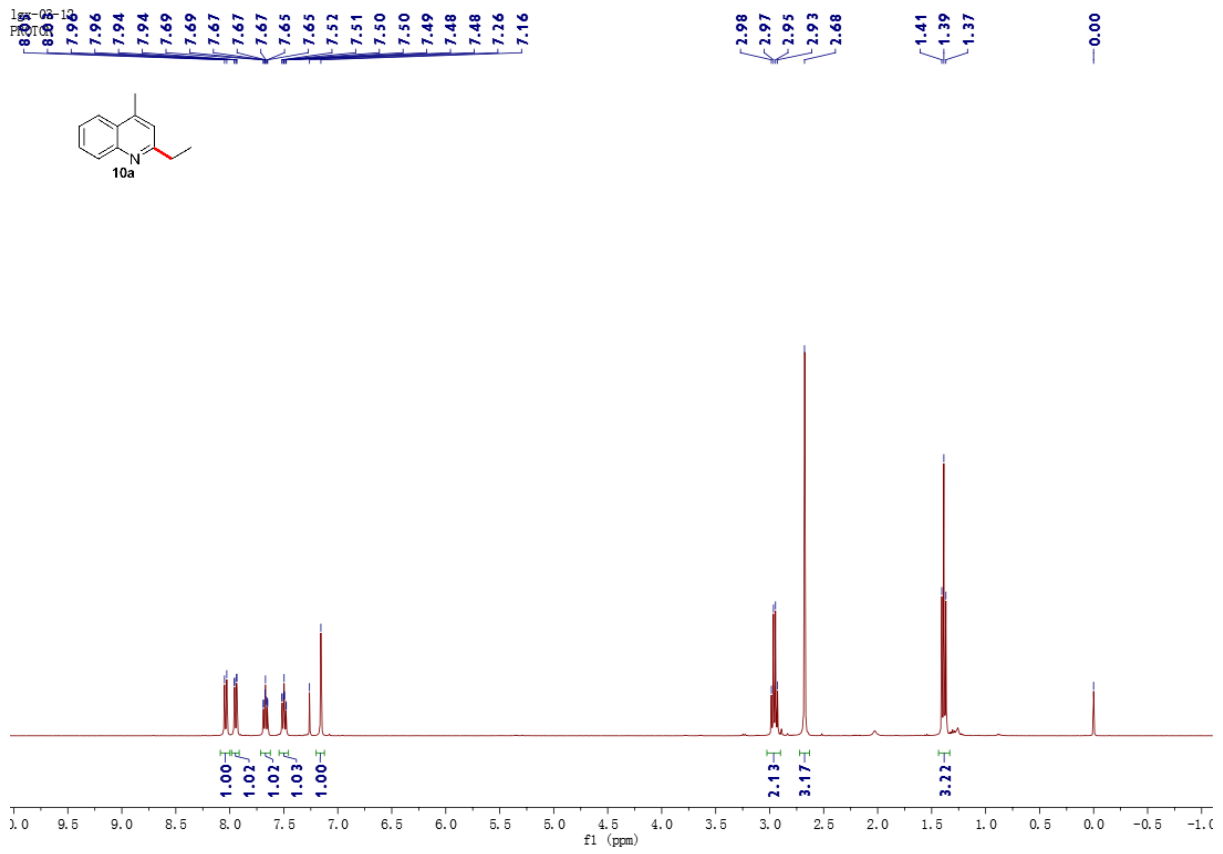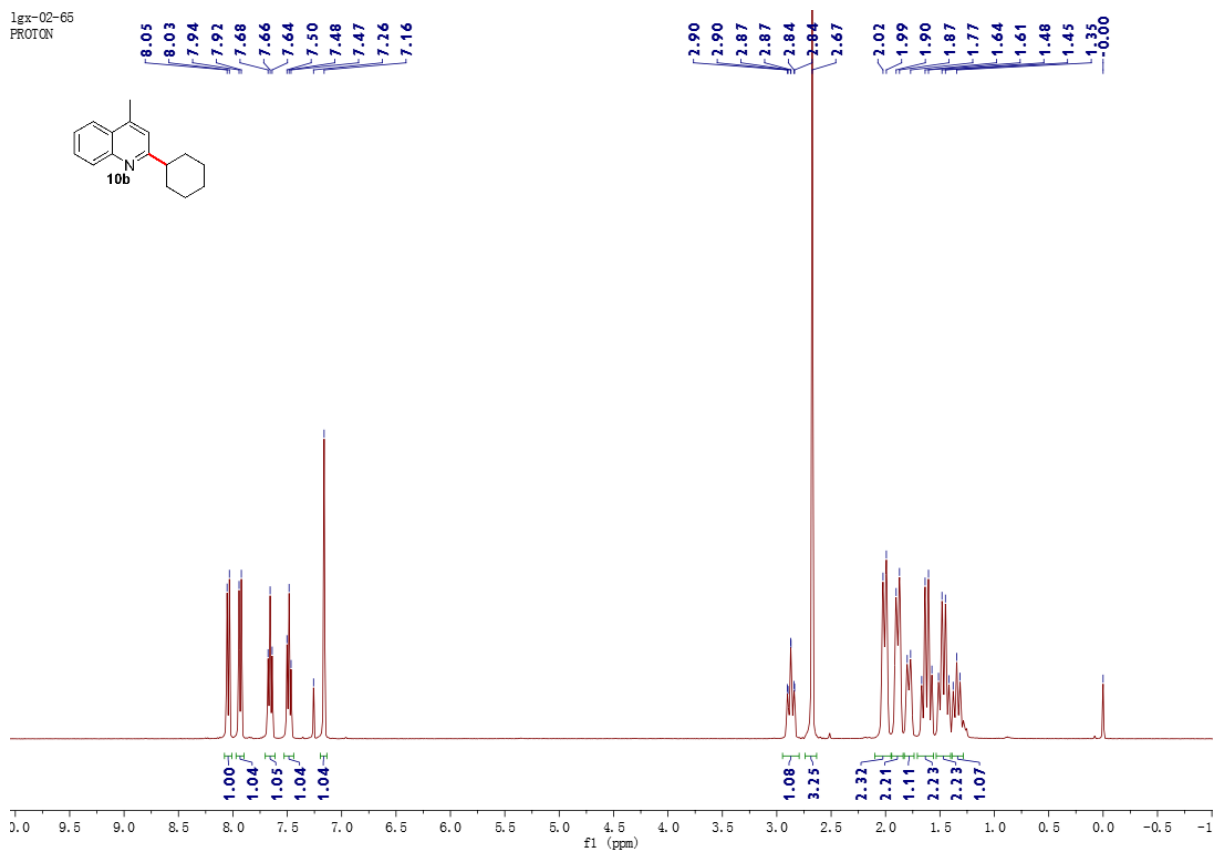

1gx-2-194  
PROTON

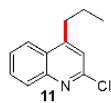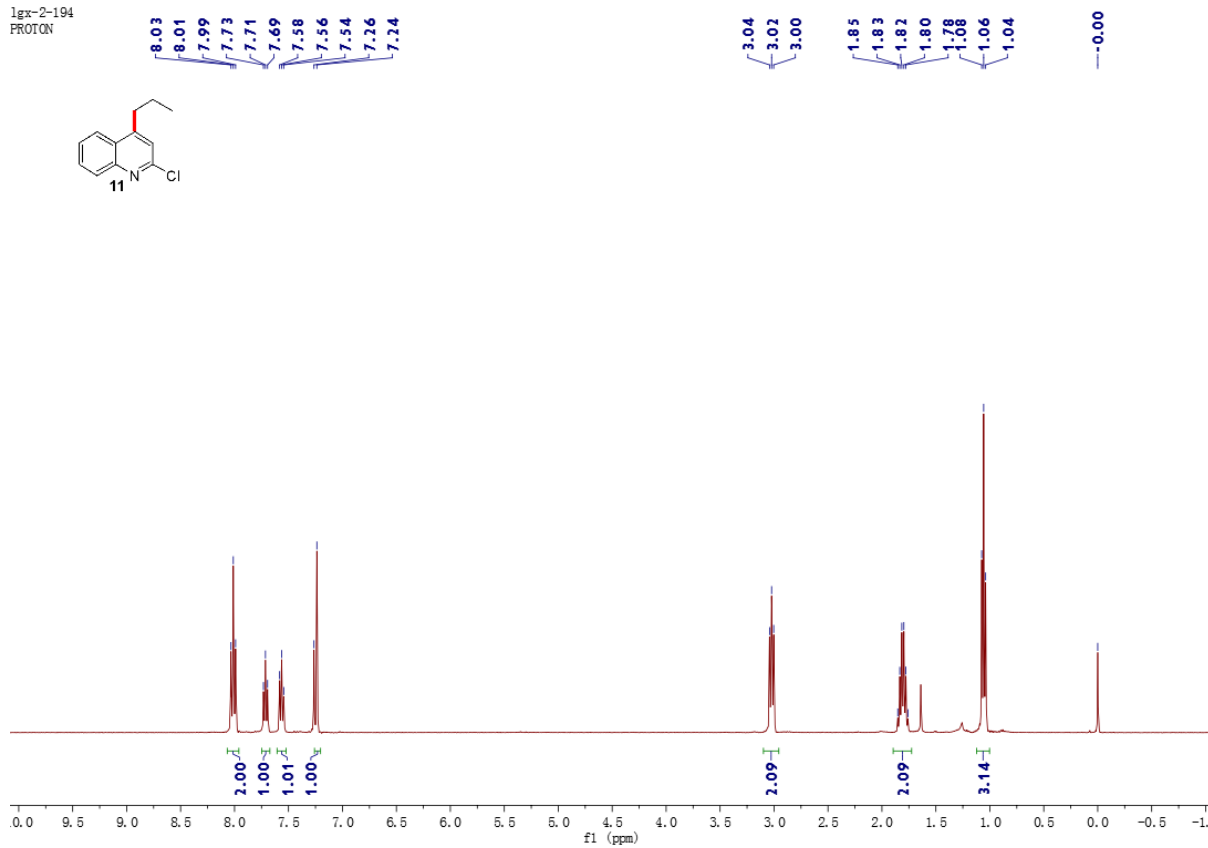

1gx-2-194  
C13CPD

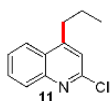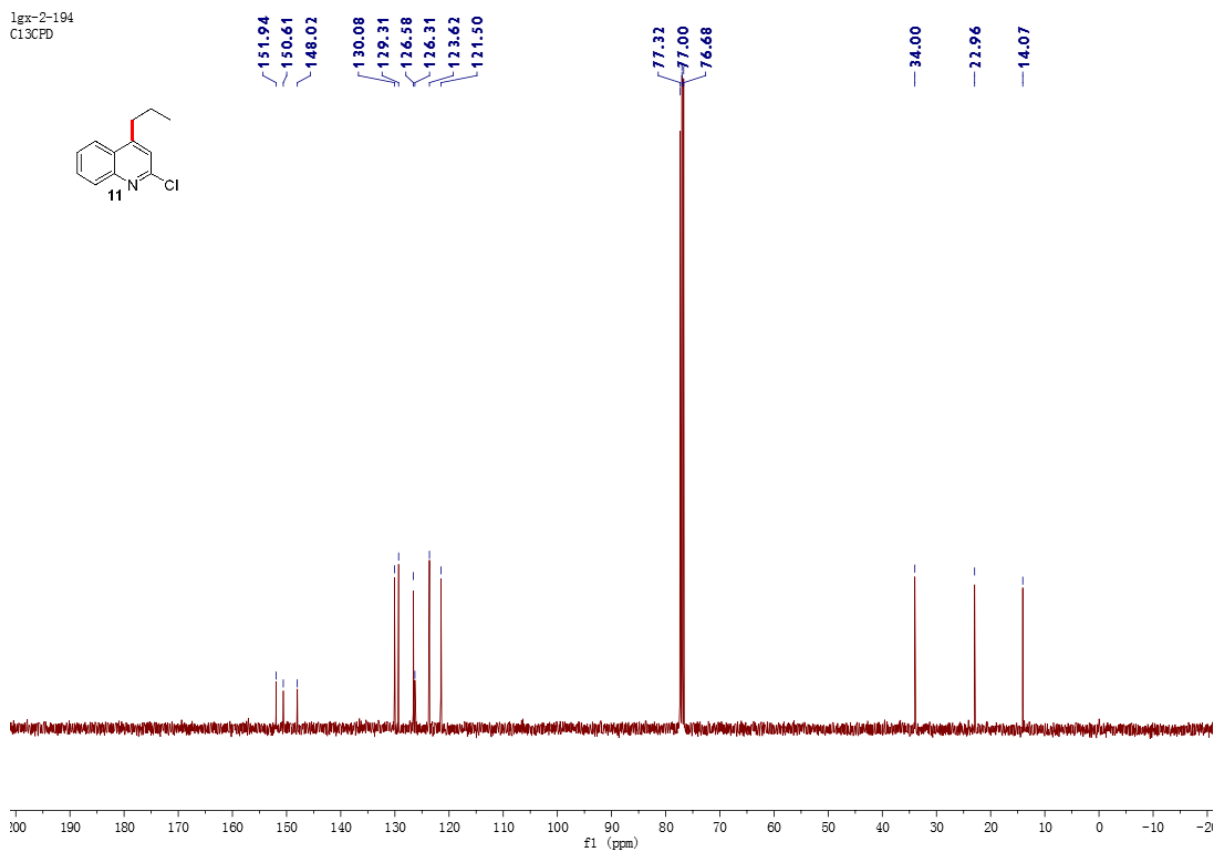

1gx-2-186  
PROTON

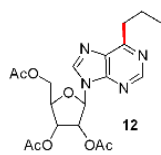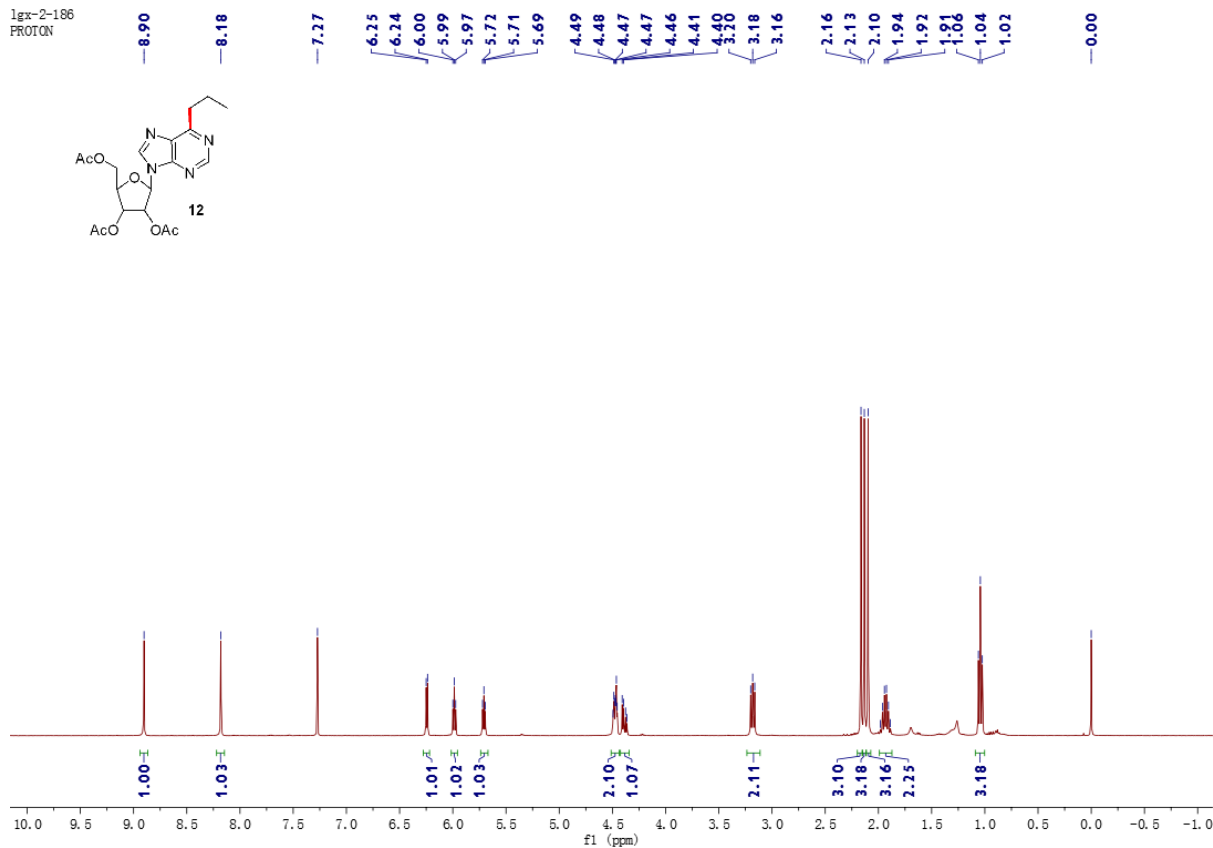

1gx-3-07  
PROTON

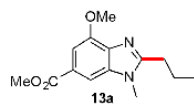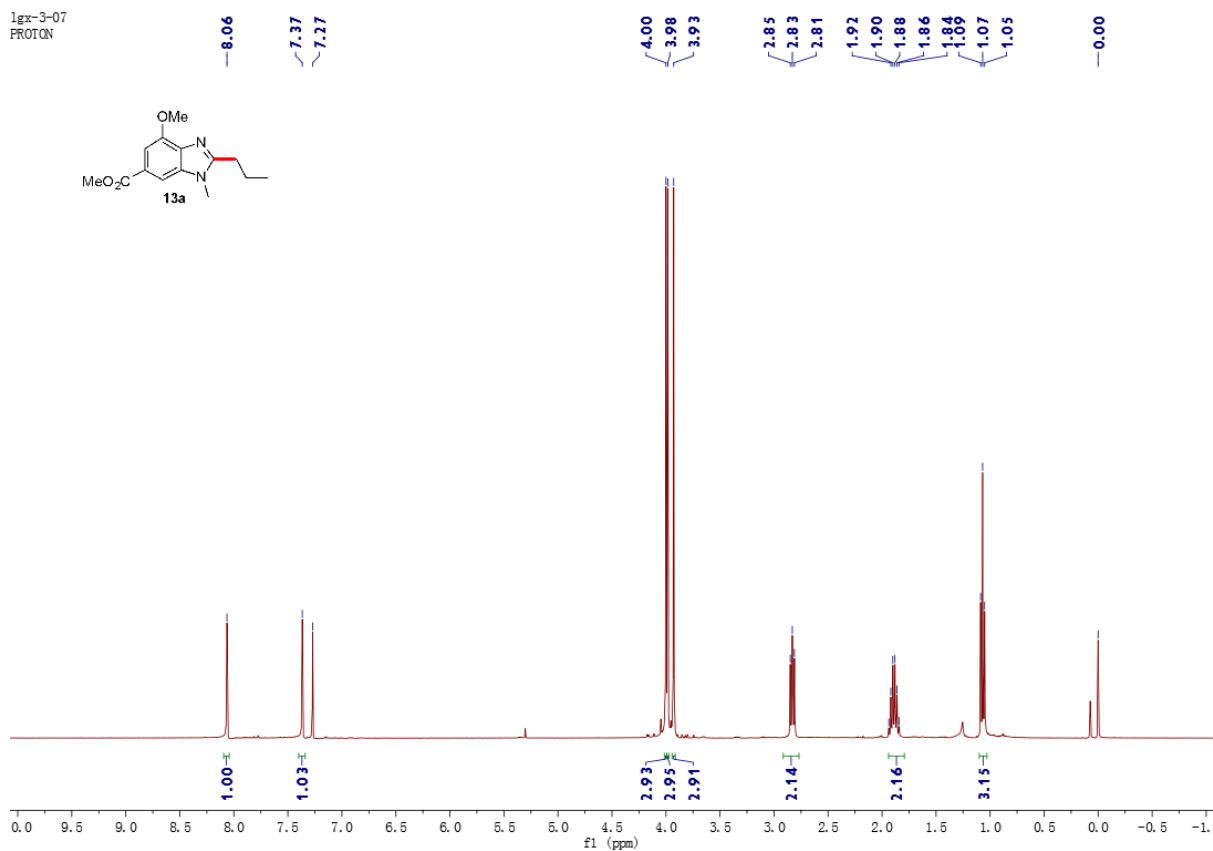

lgx-3-07  
Cl3CPD

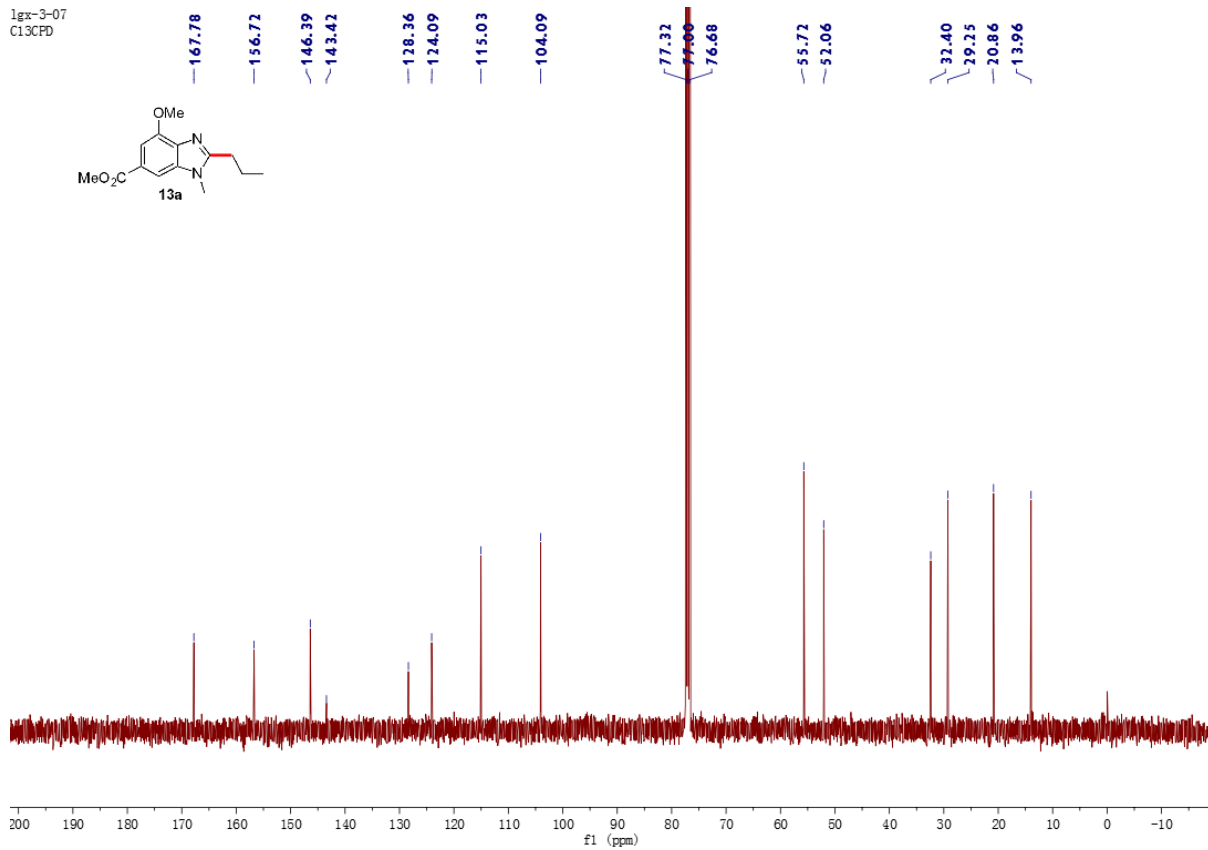

LGX-2-98  
PROTON

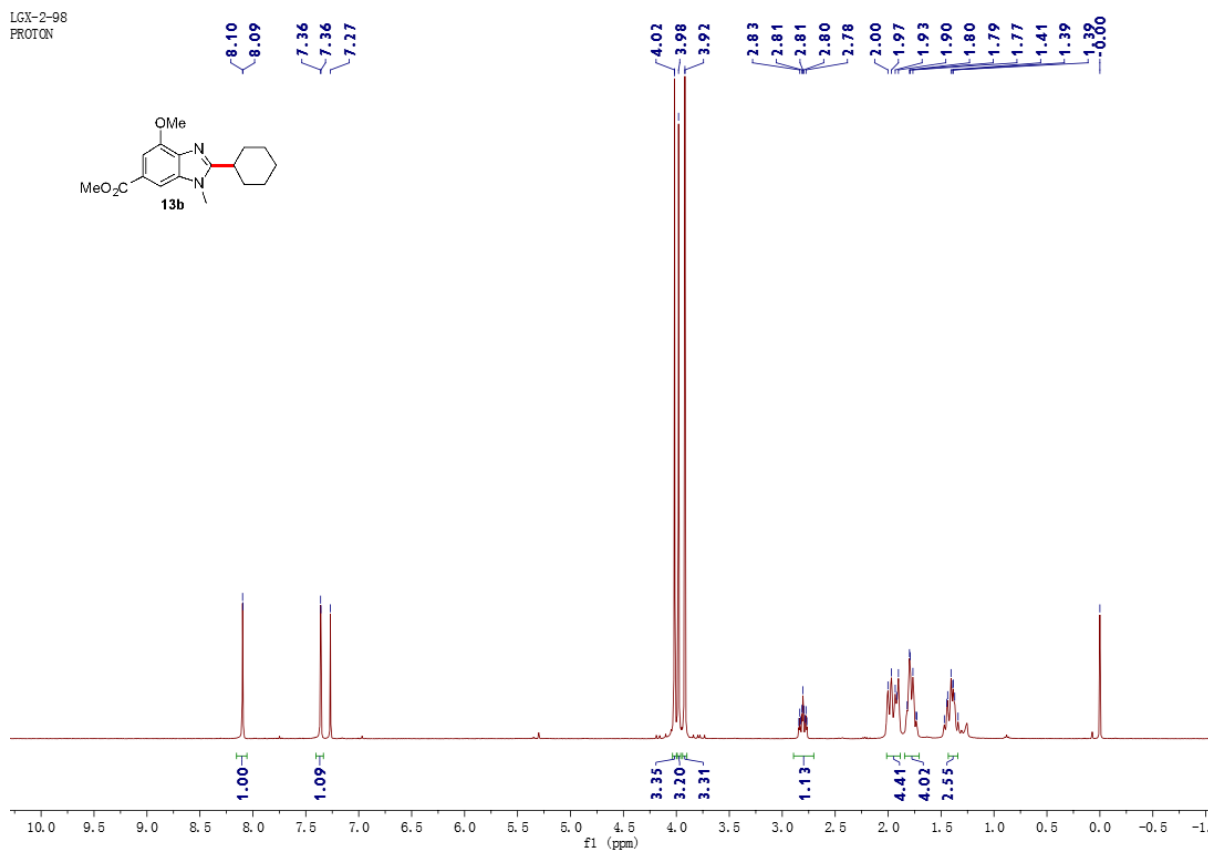

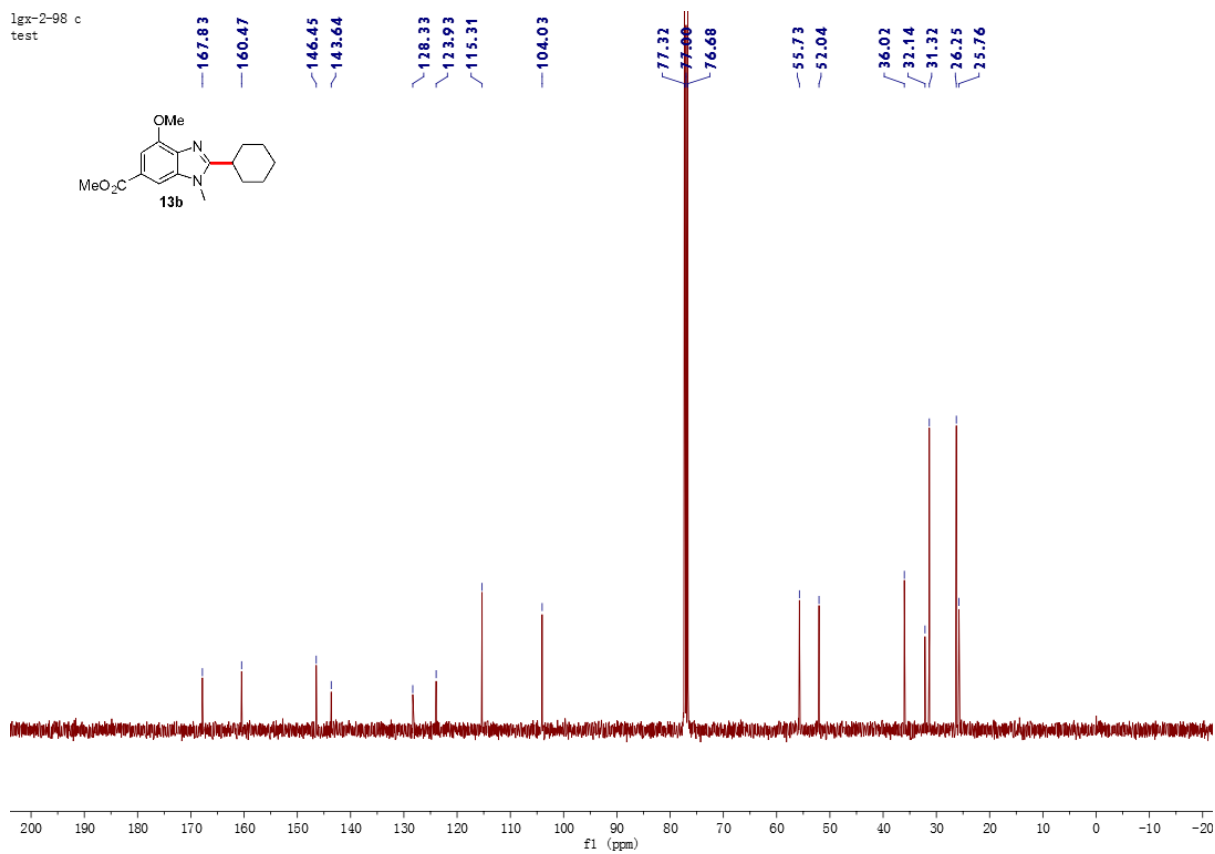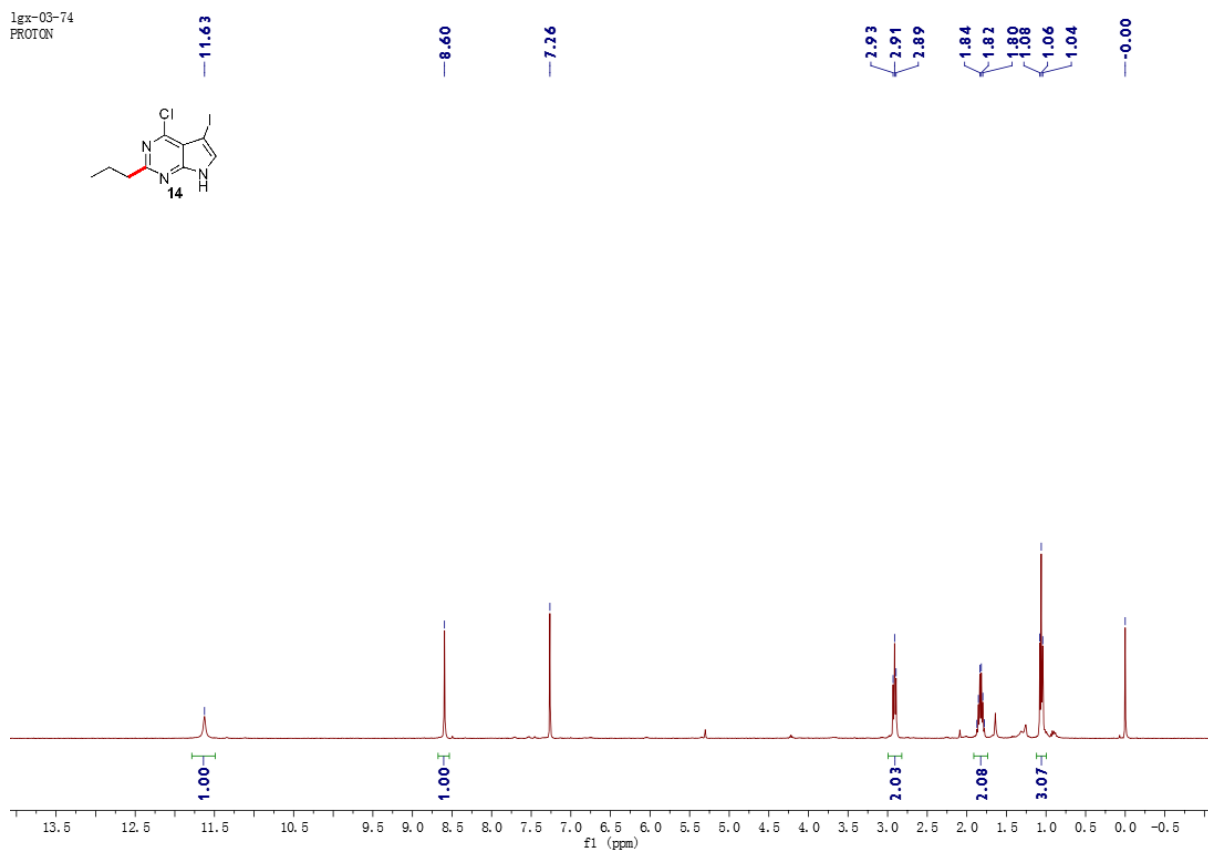

lgx-03-74-C  
Cl3CPD

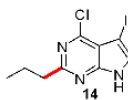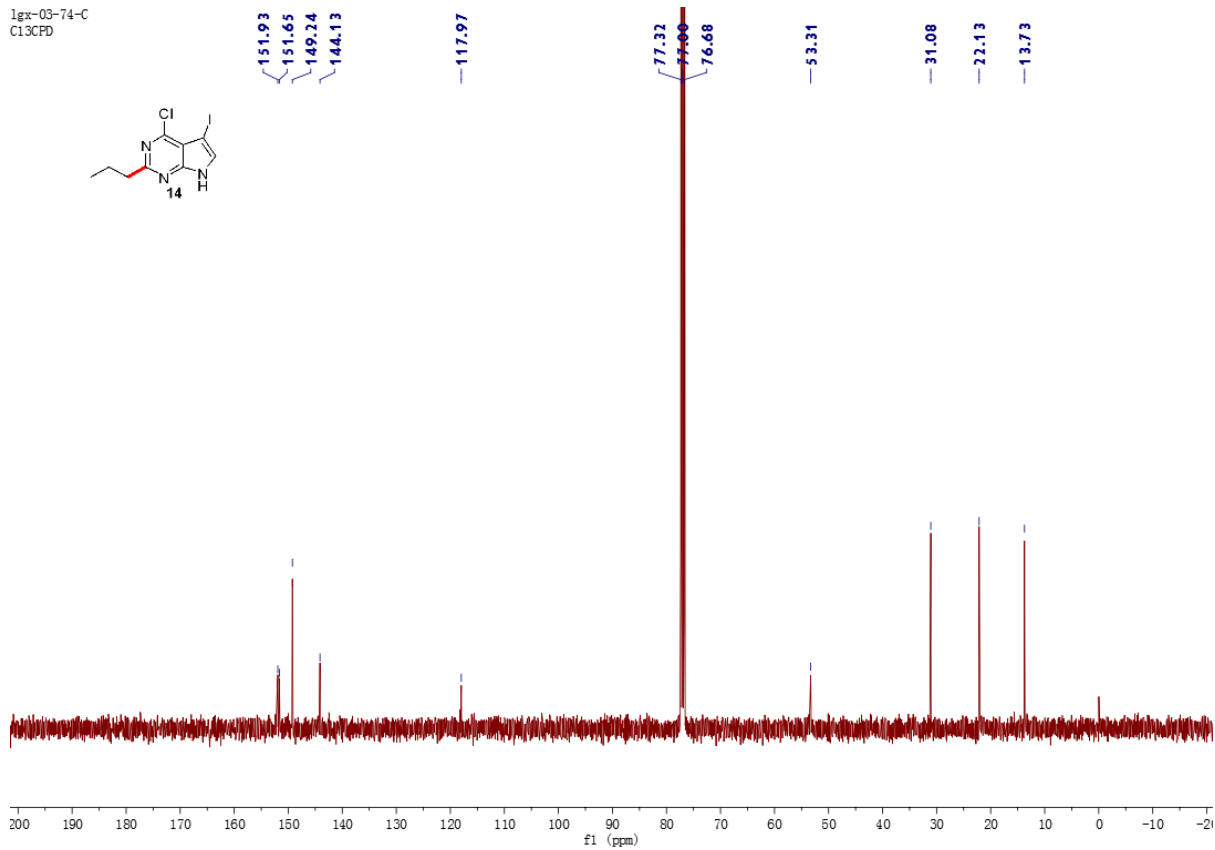

lgx-3-06  
test

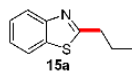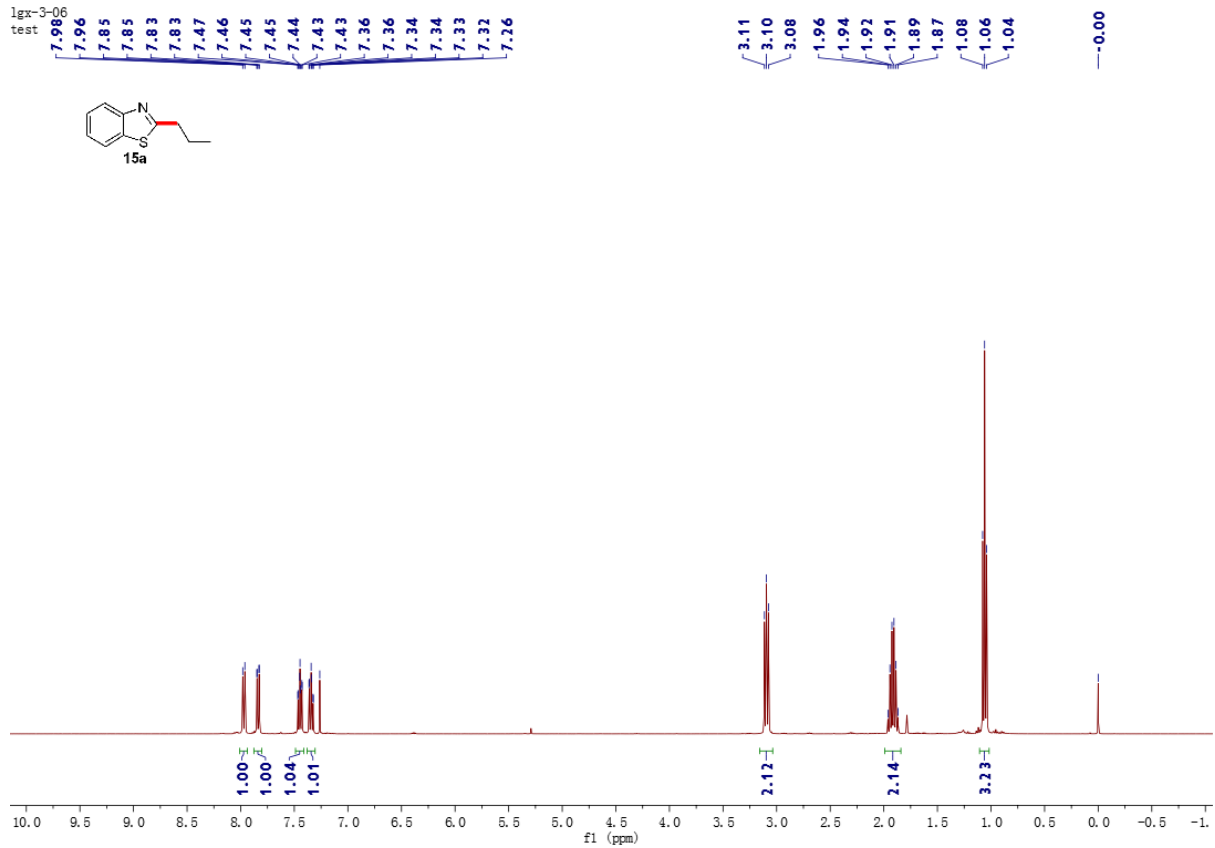



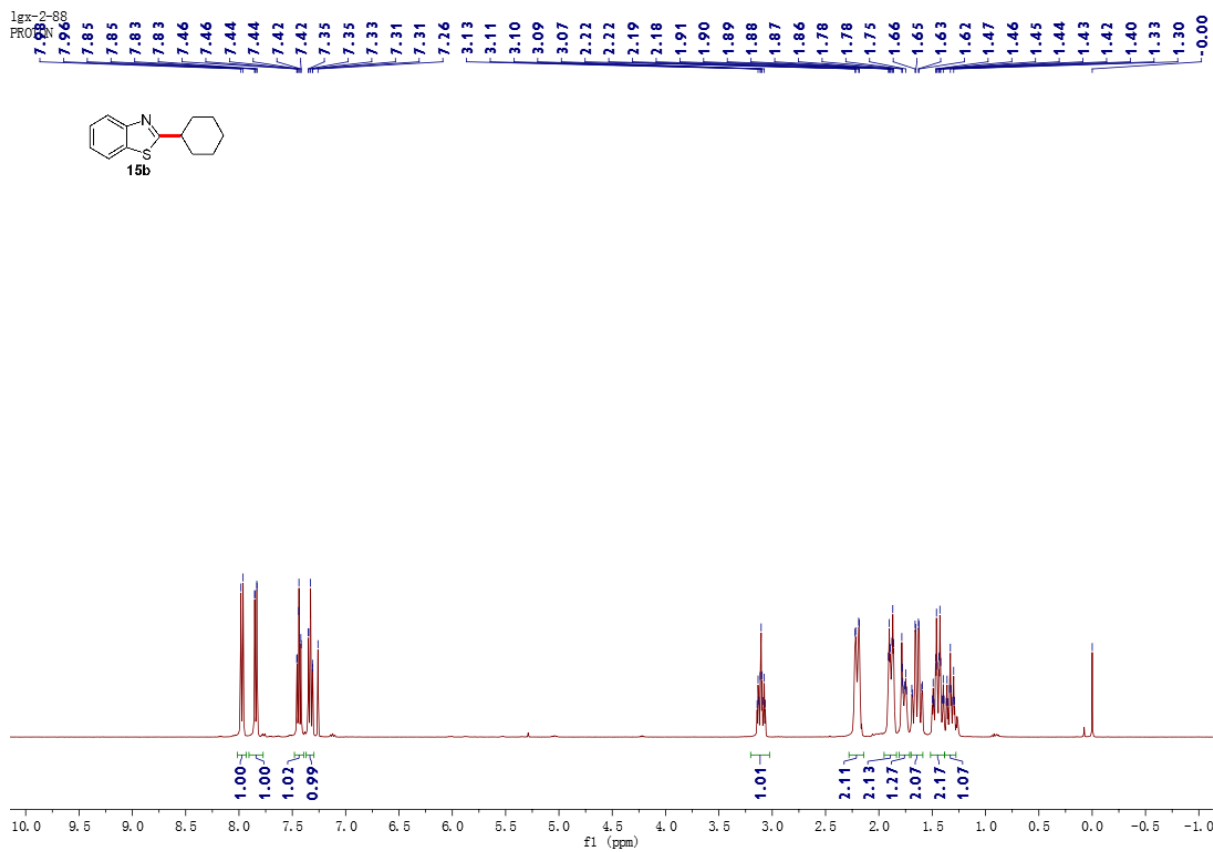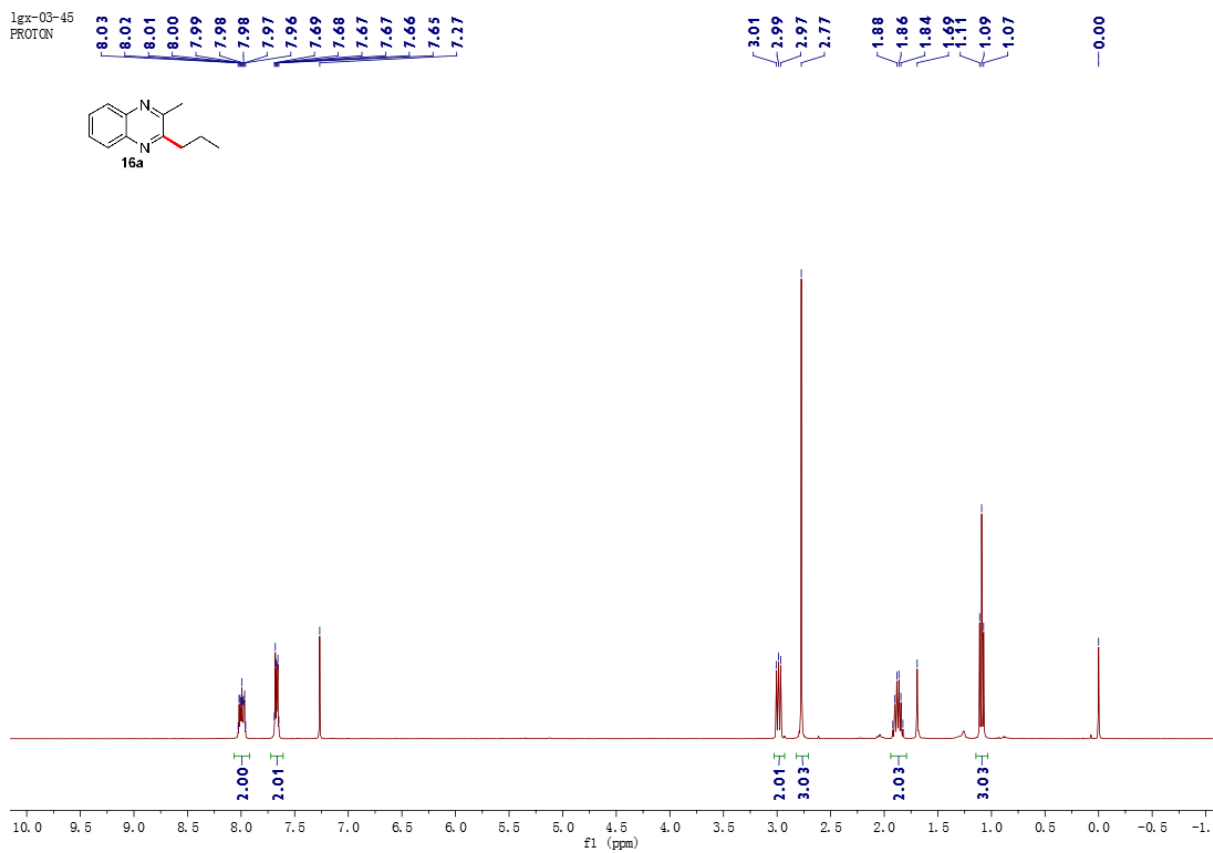

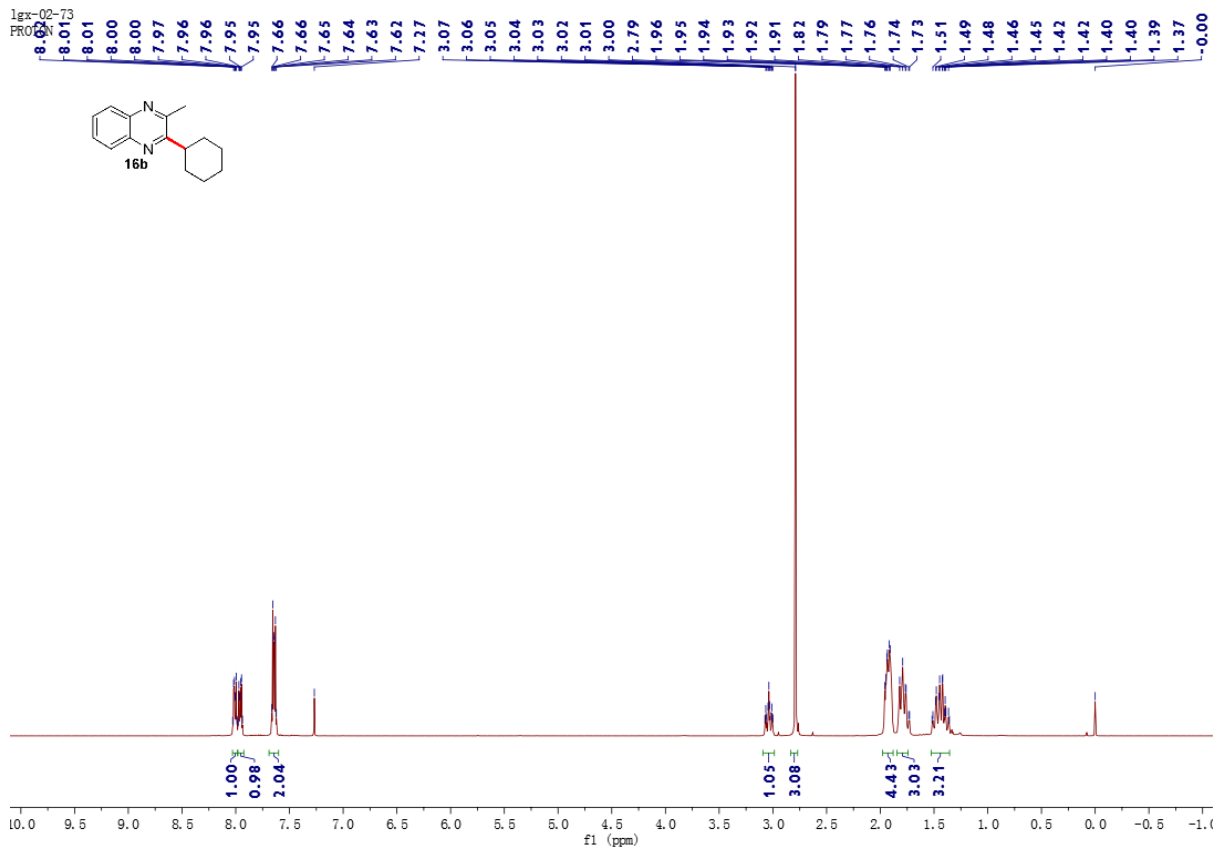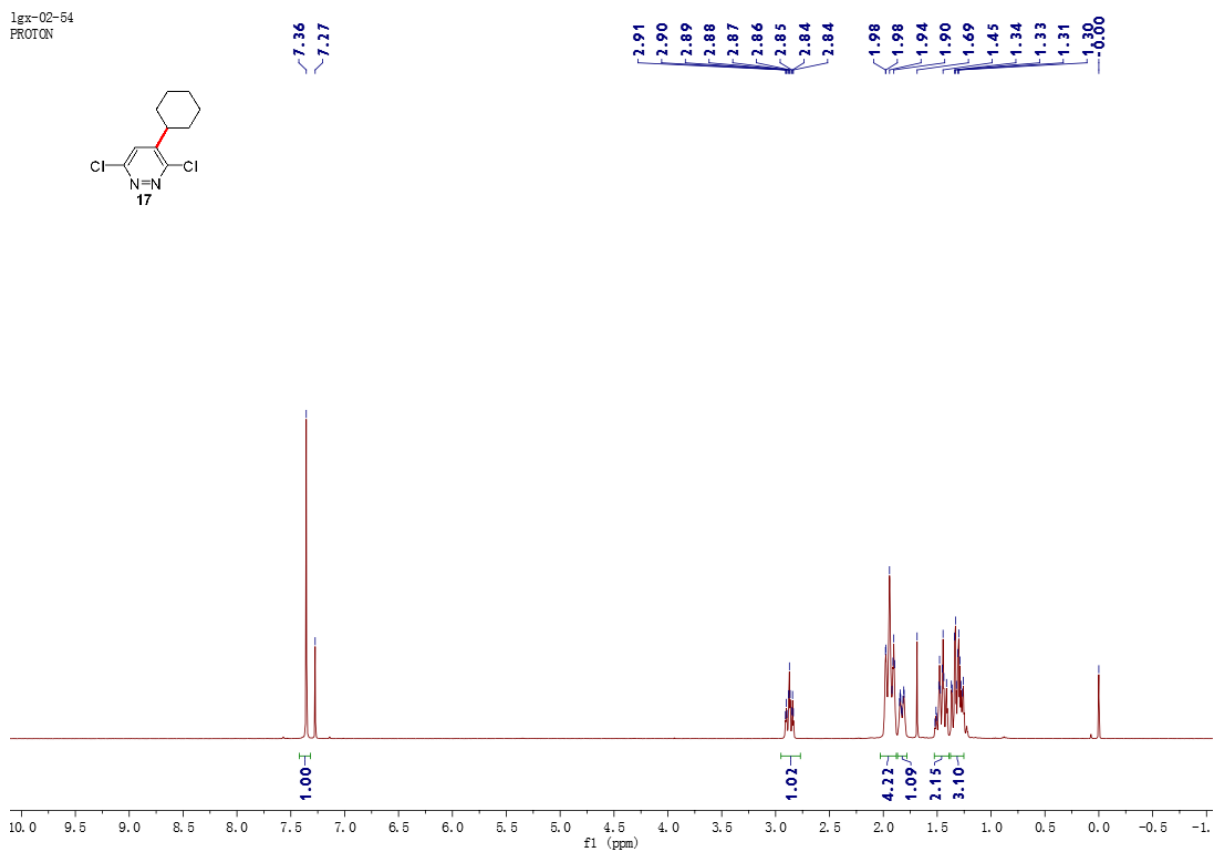

1gx-02-192  
PROTON

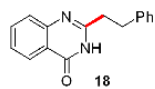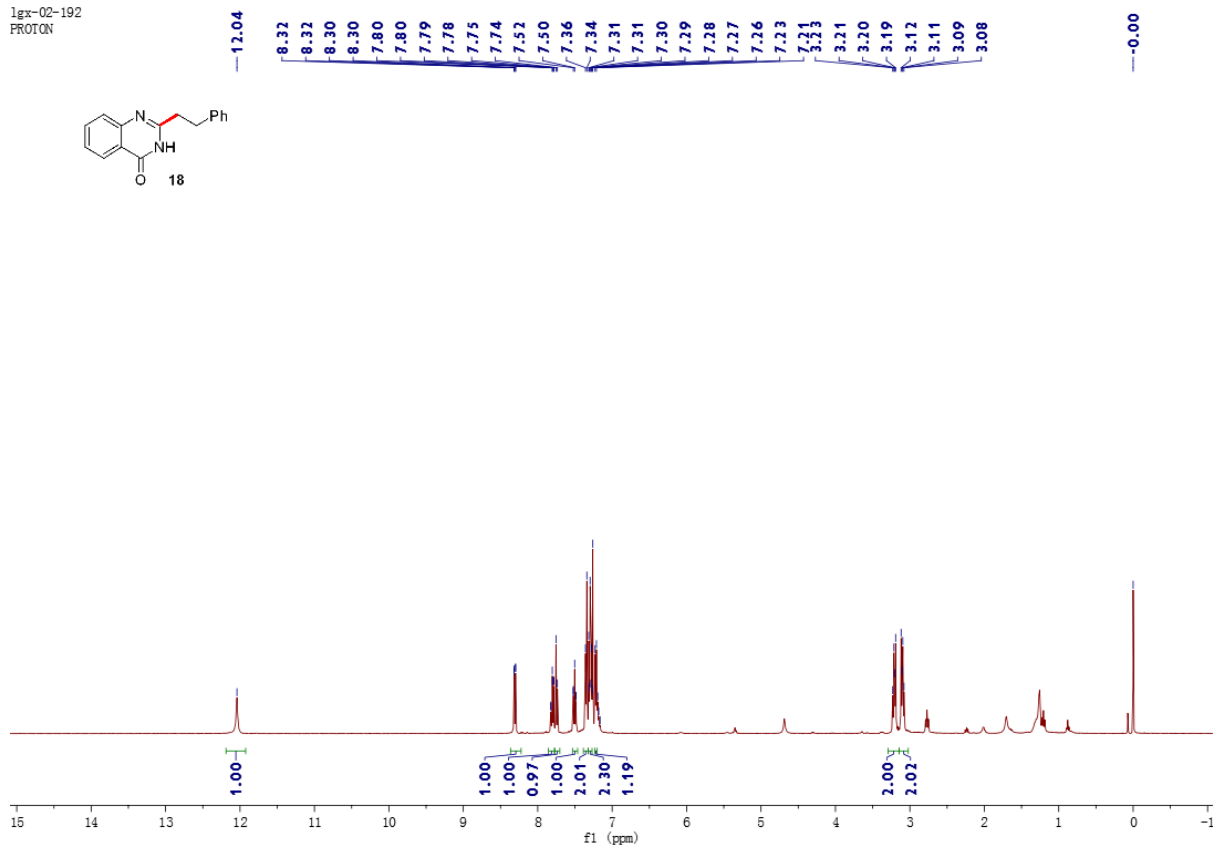

1gx-03-32  
PROTON

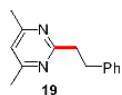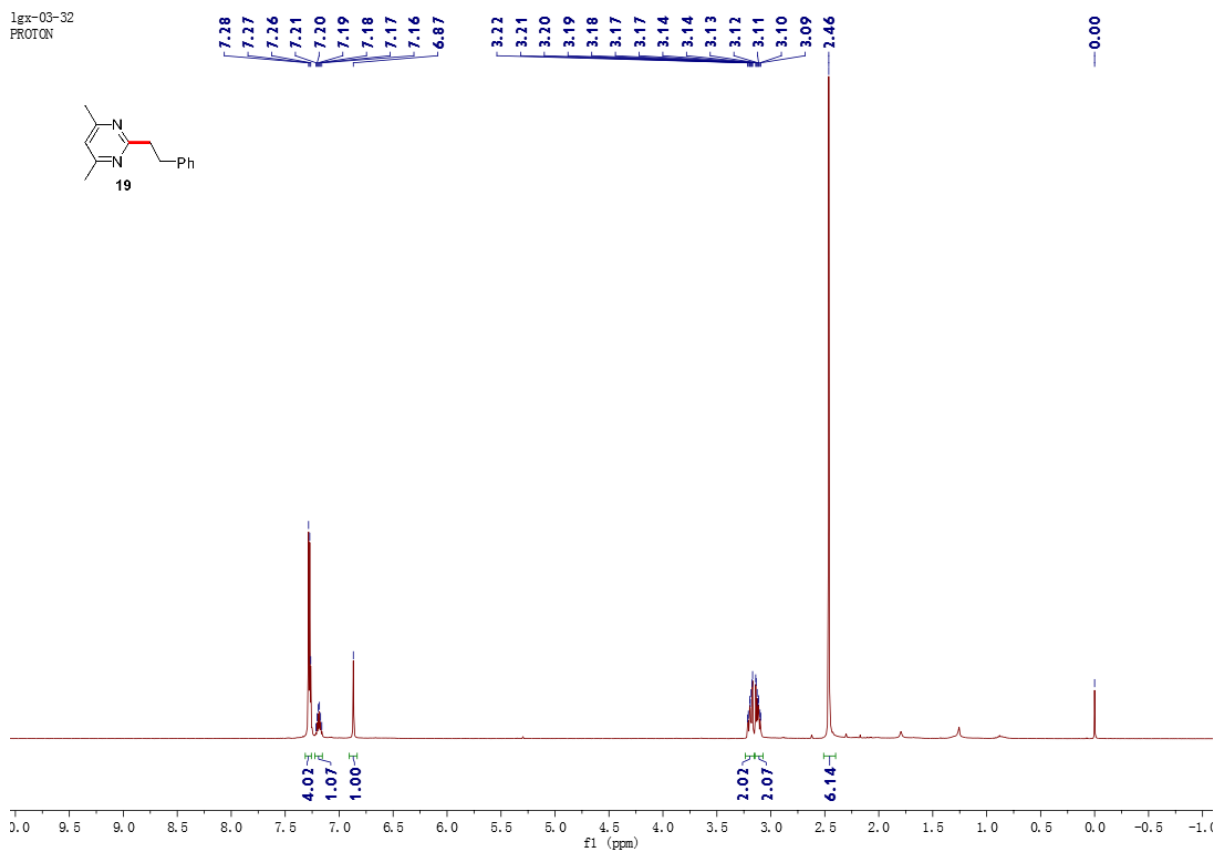

1gx-03-62-C  
C13CPD

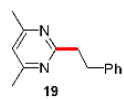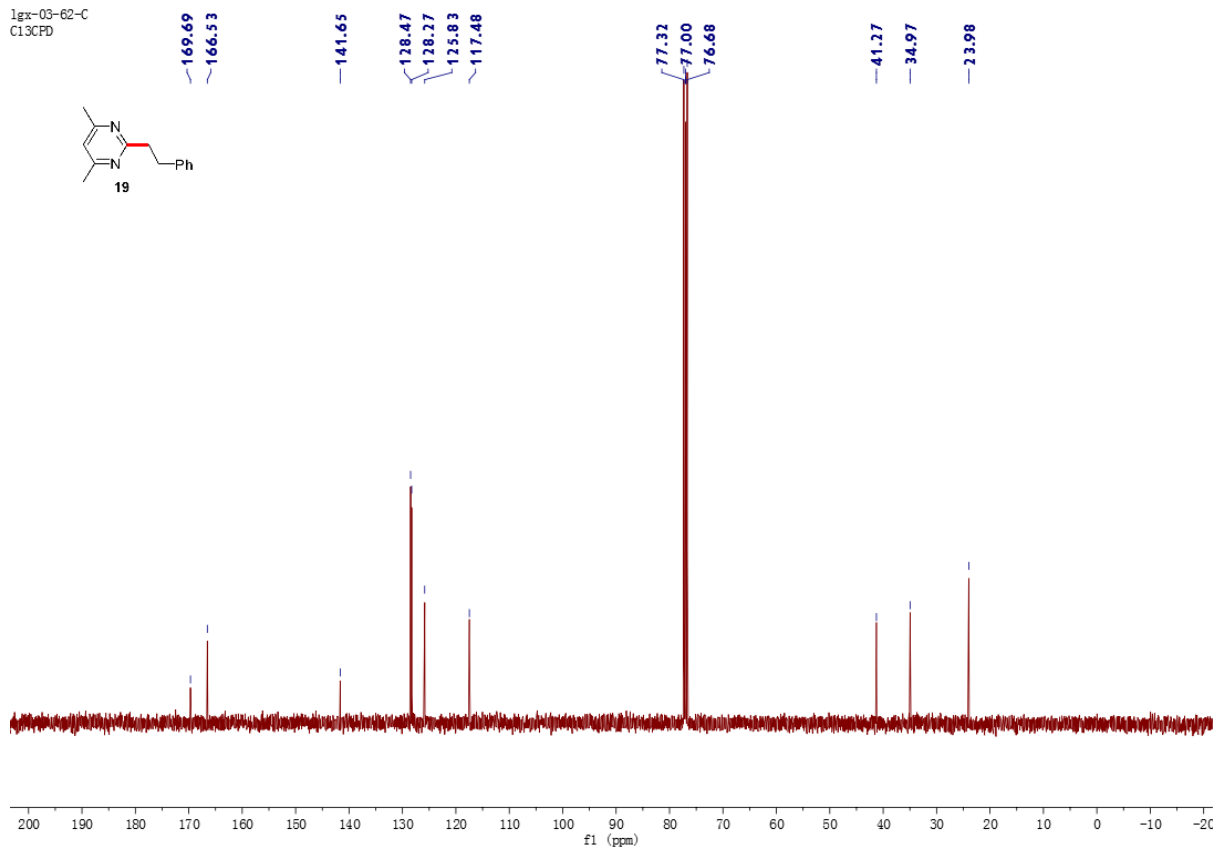

1gx-02-80-1e  
PRO

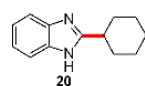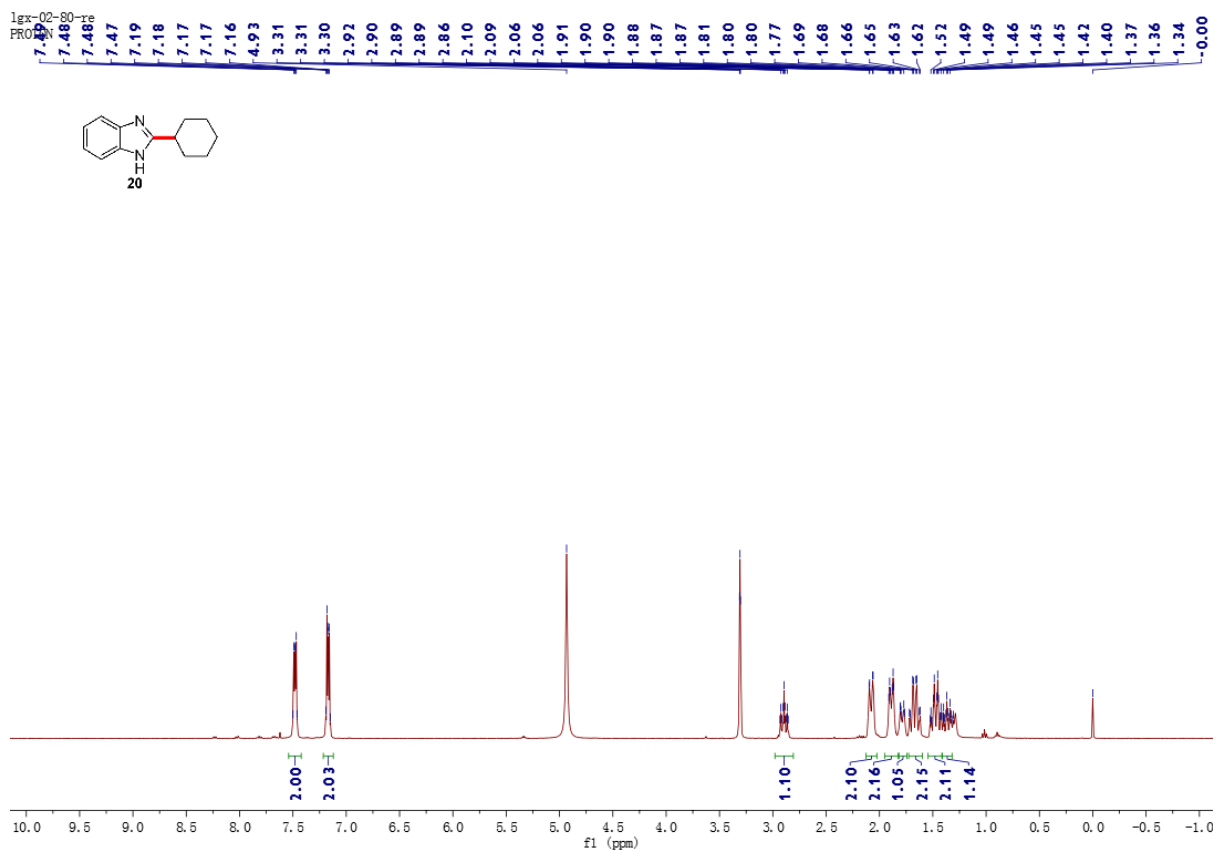

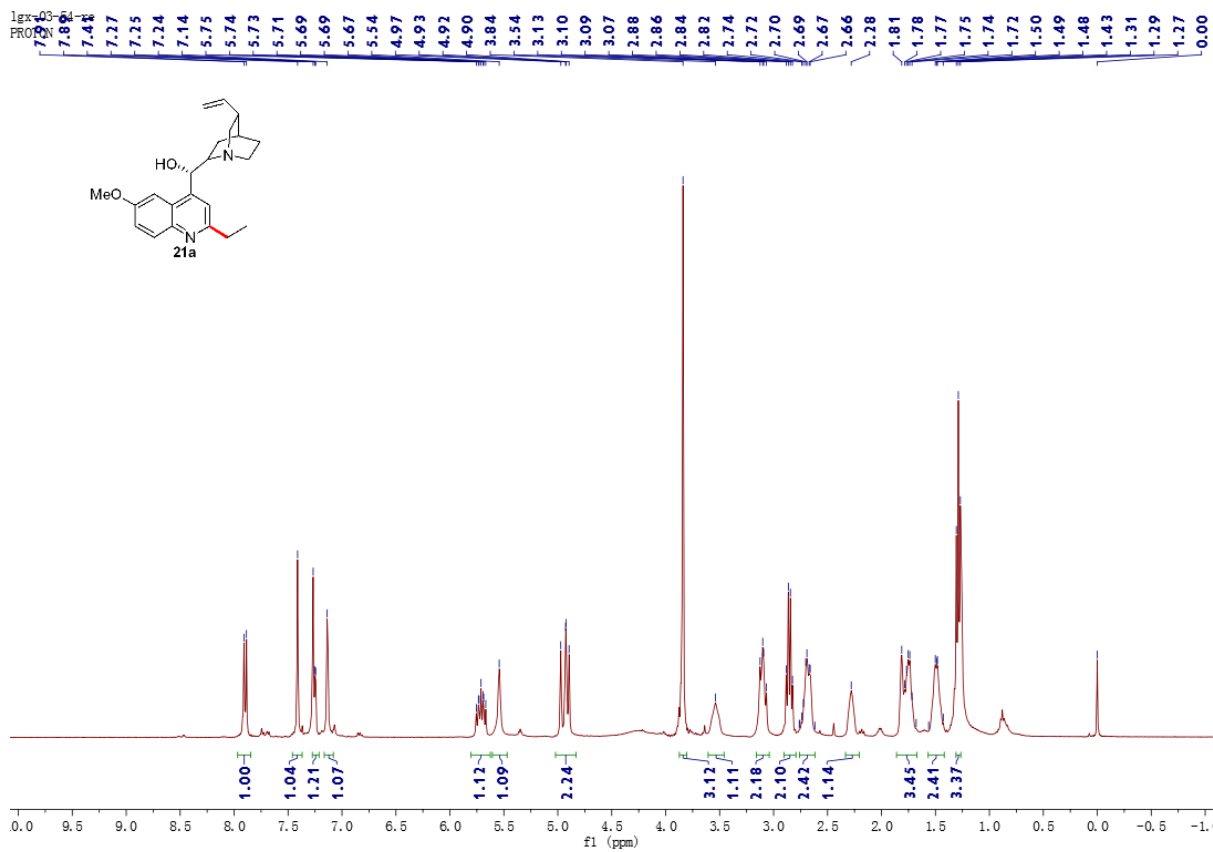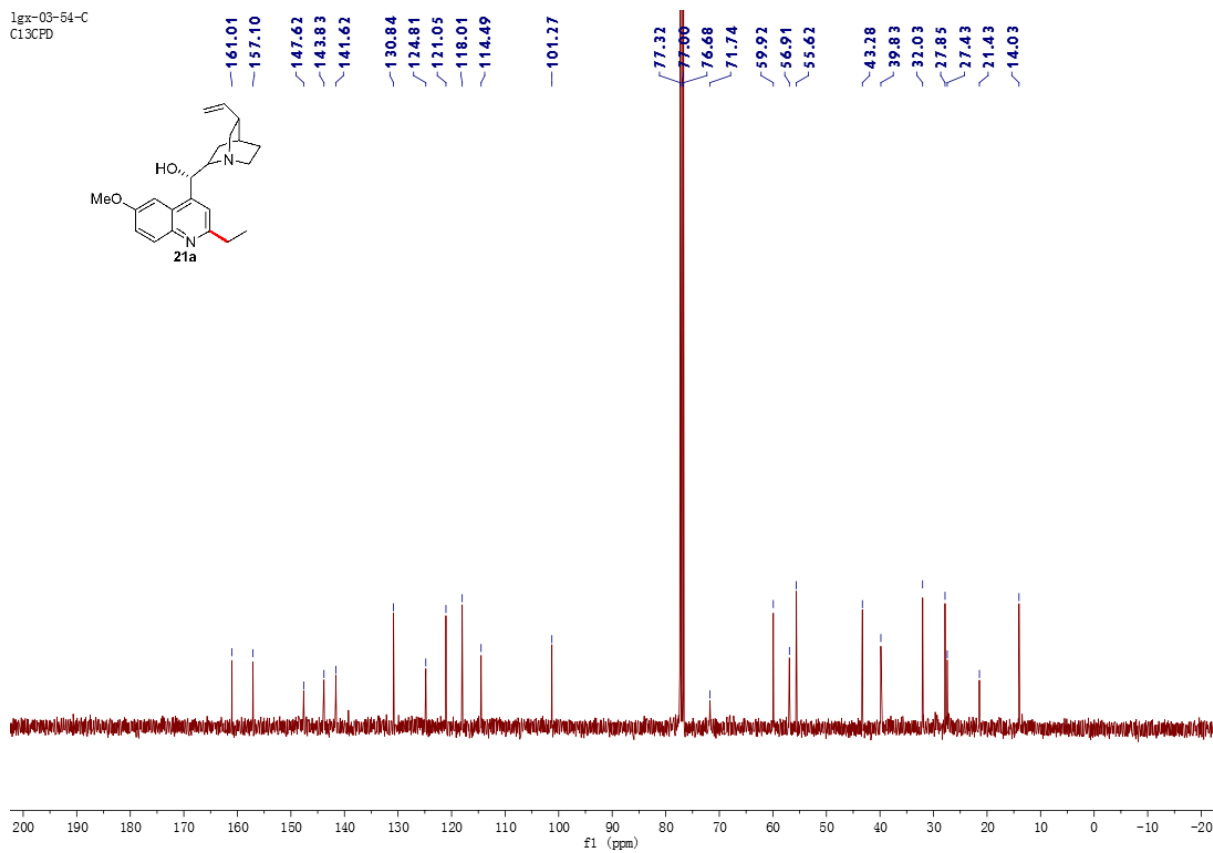

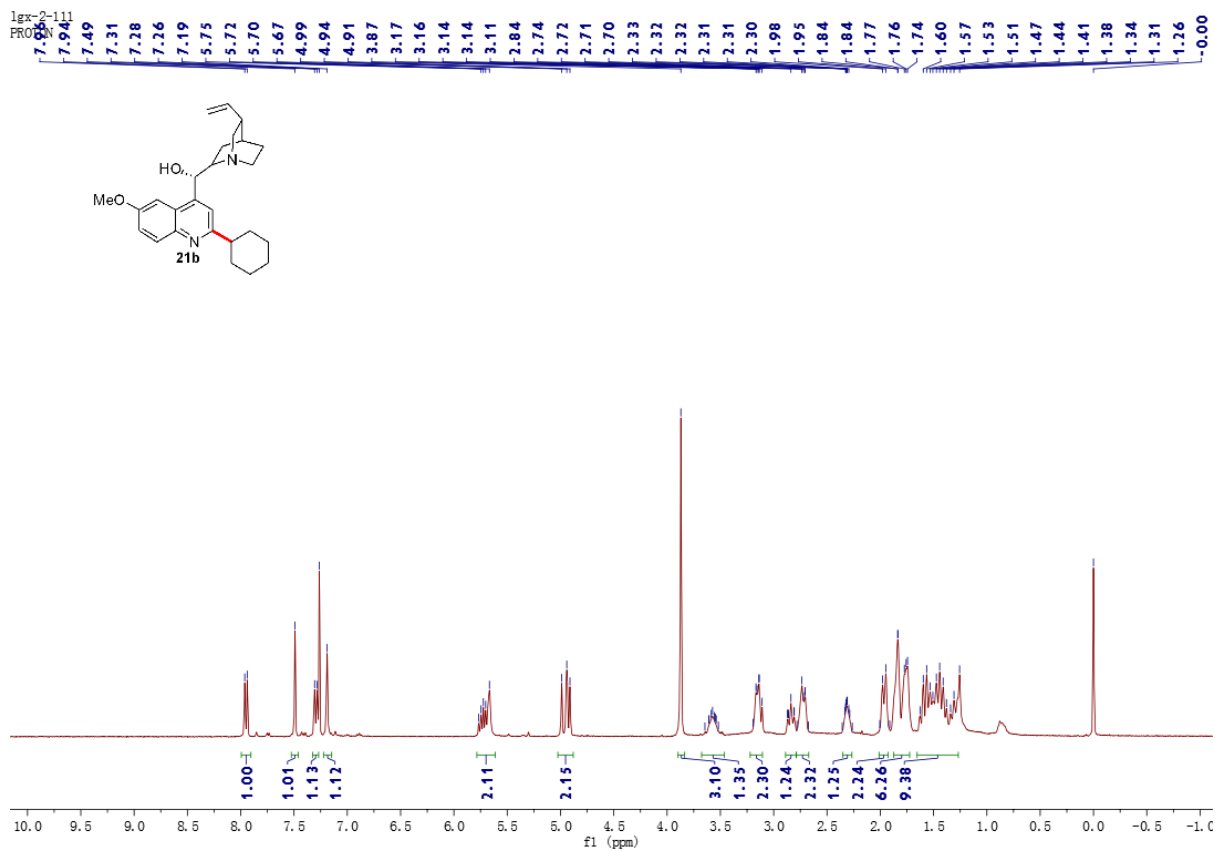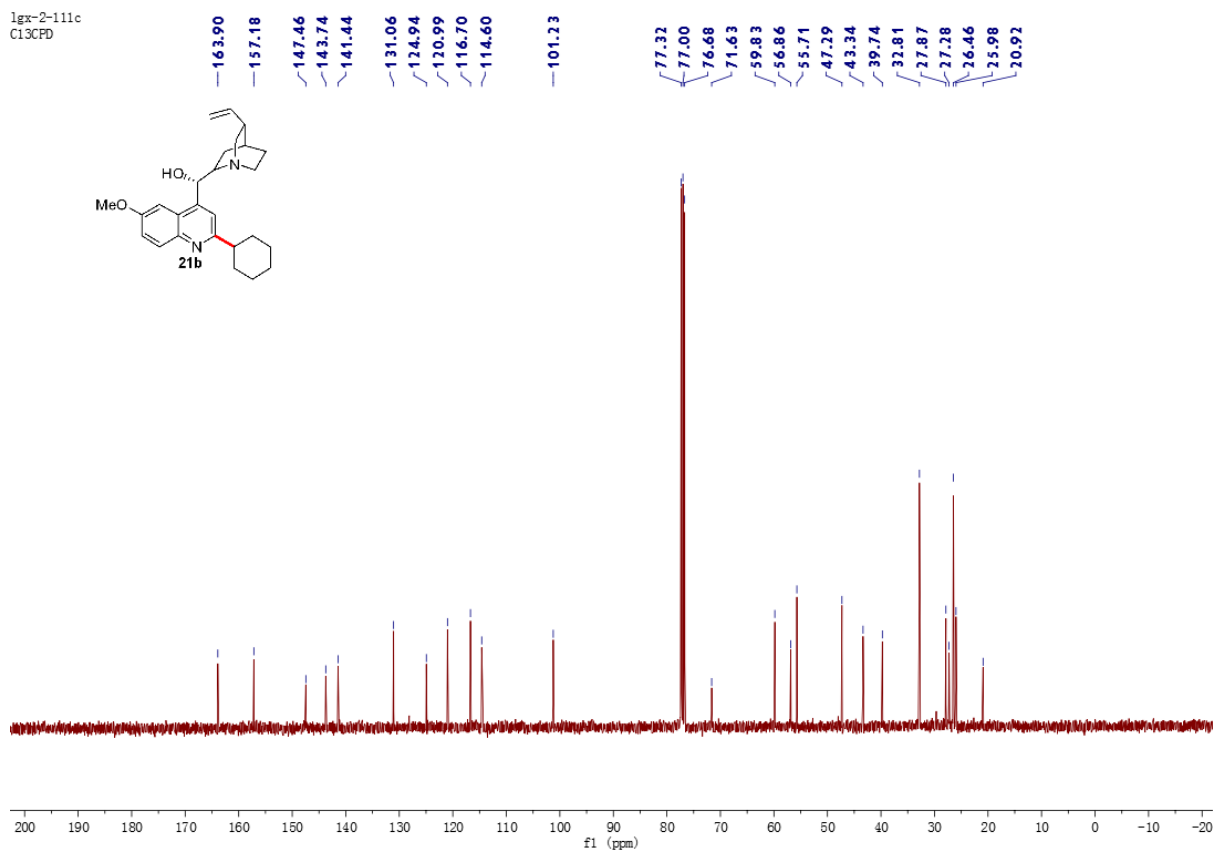

1gx-2-172  
PROTON

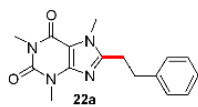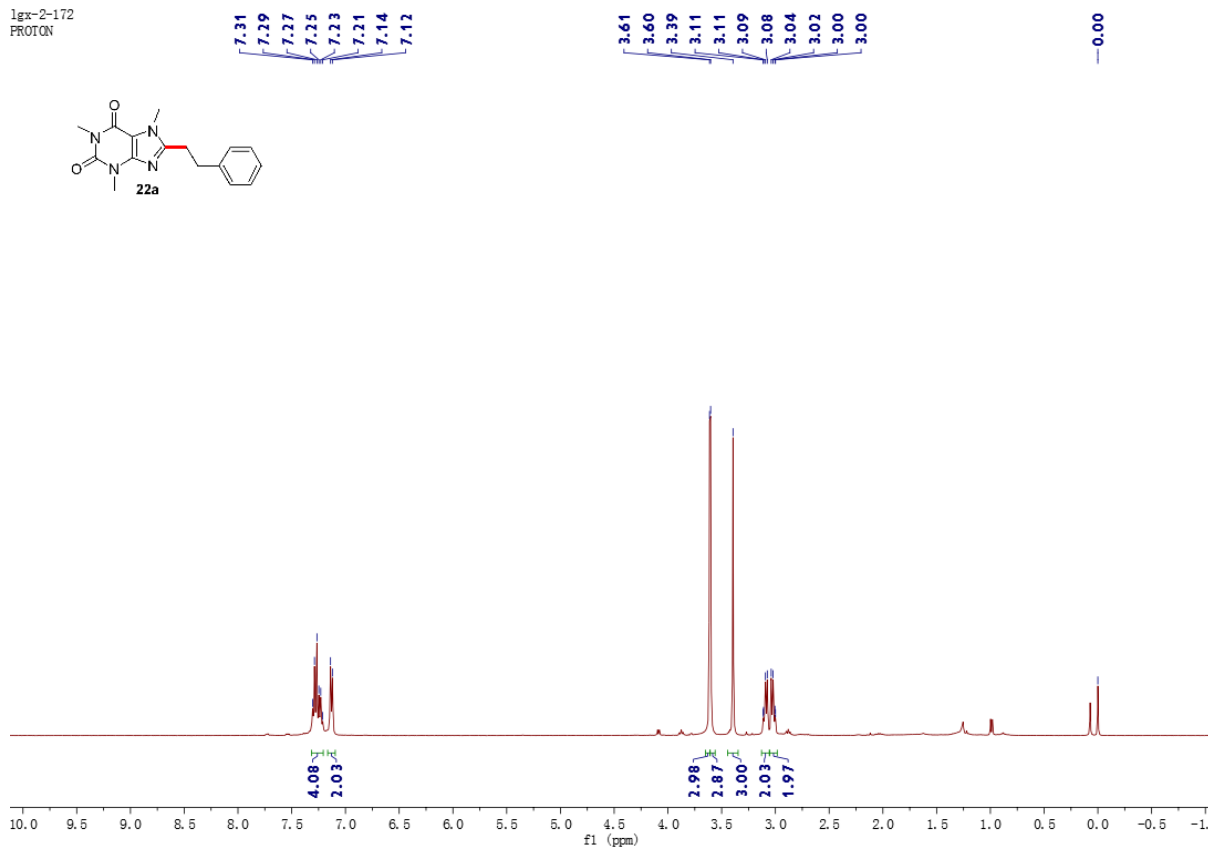

1gx-2-172  
C13CPD

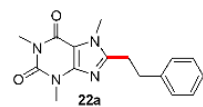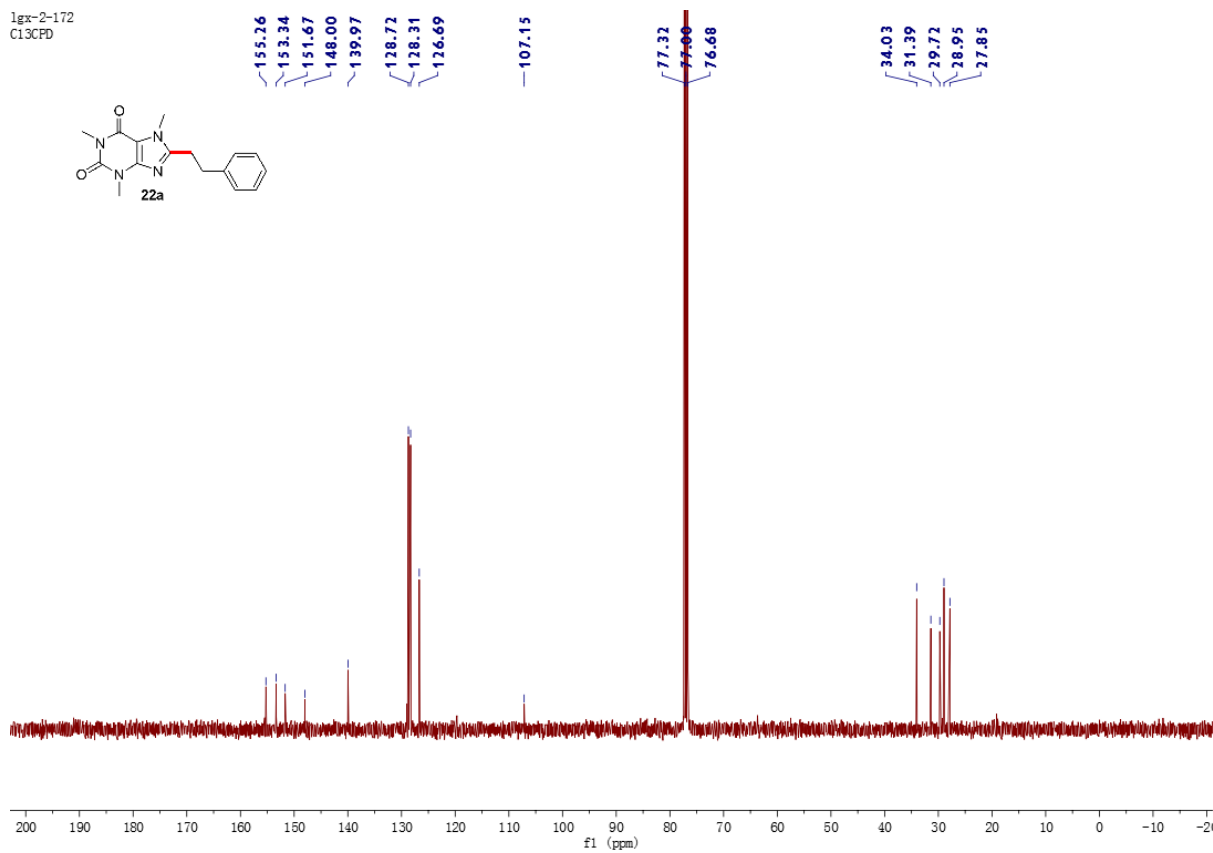

gf1-163 H  
PROTON

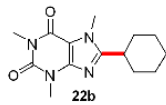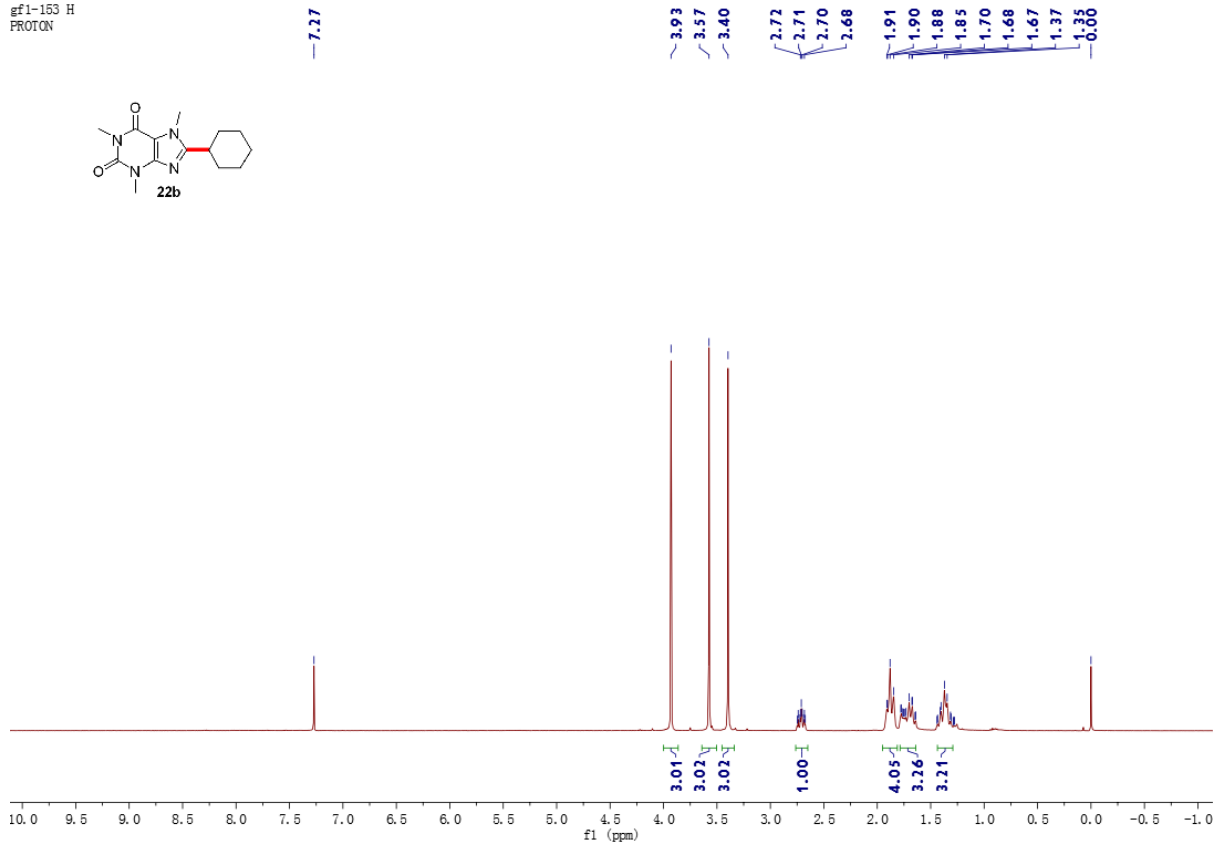

1gx-03-68-H  
PROTON

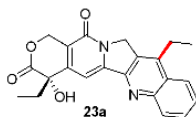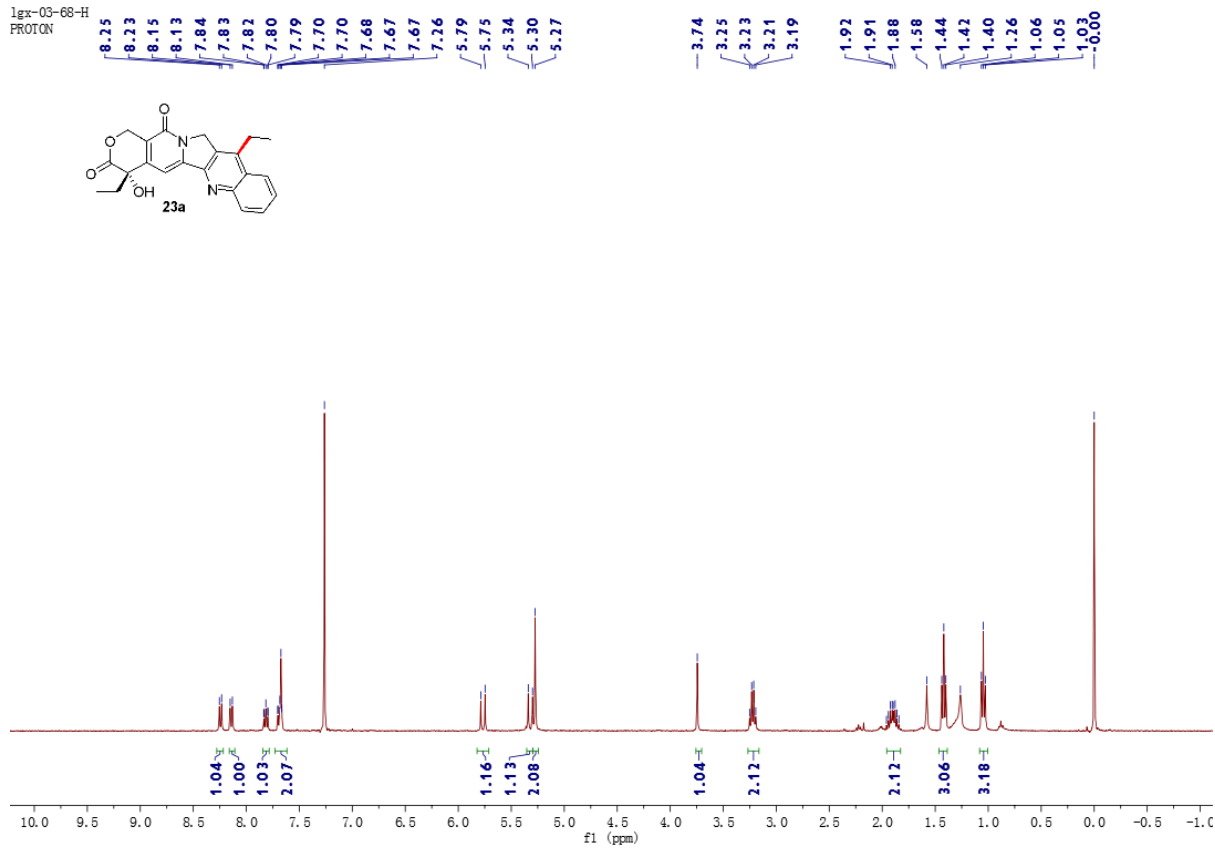



lgx-04-03

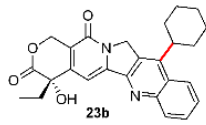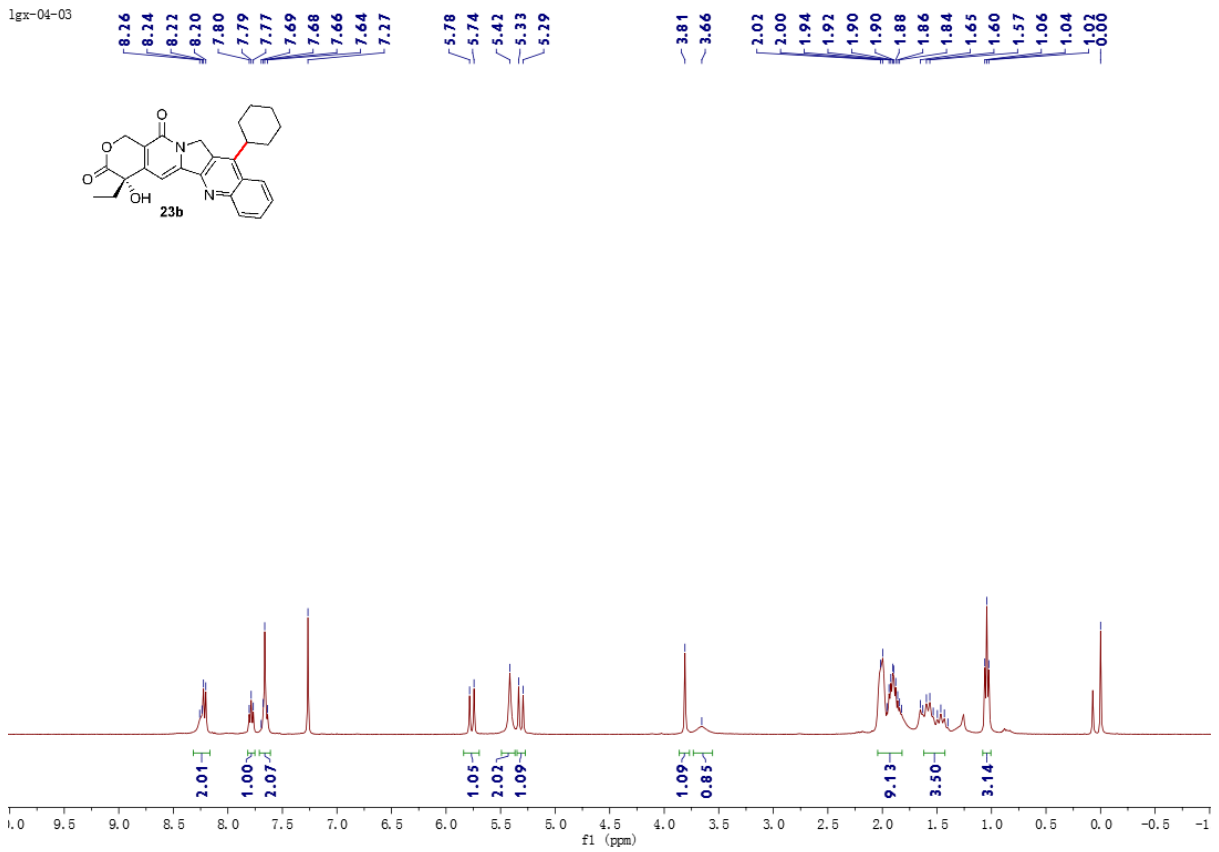

lgx-04-31

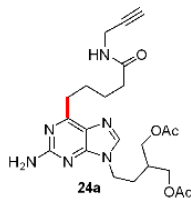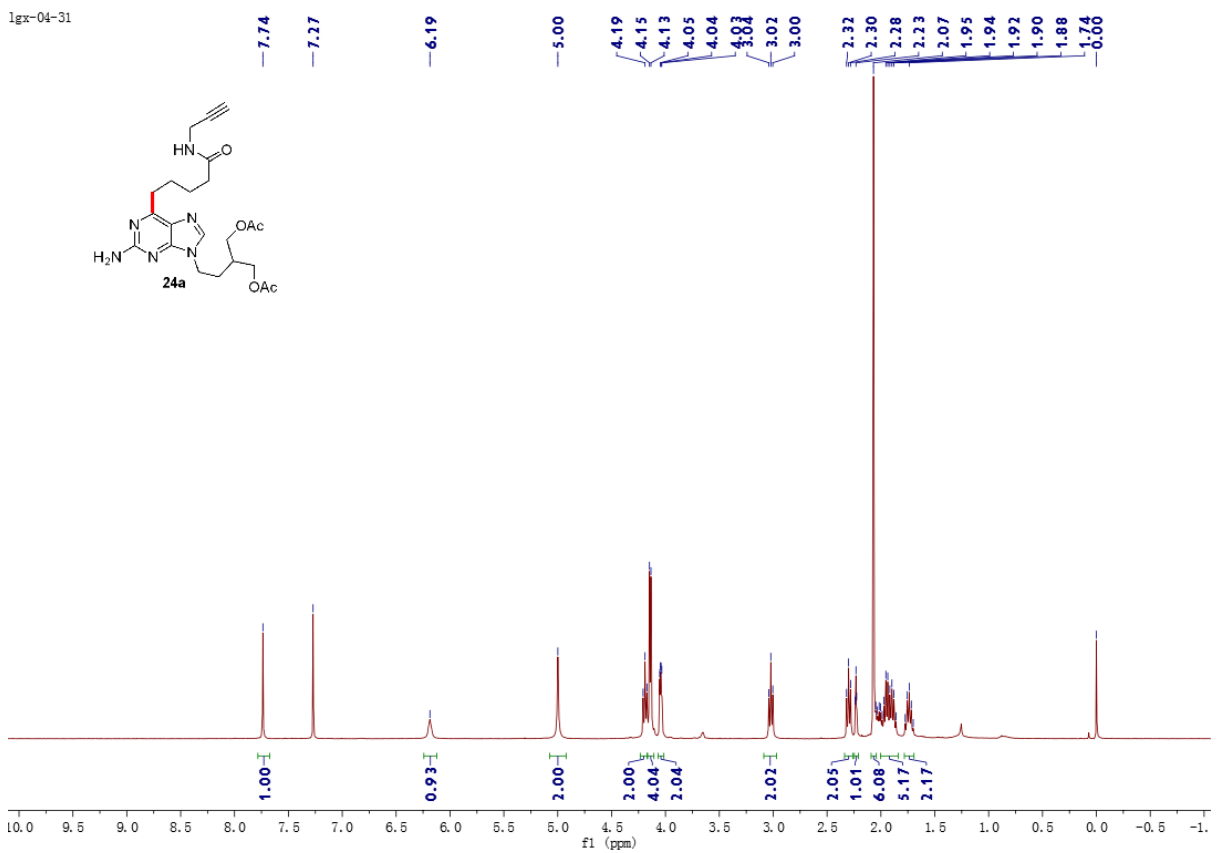

1gx-04-31 c  
13CPD

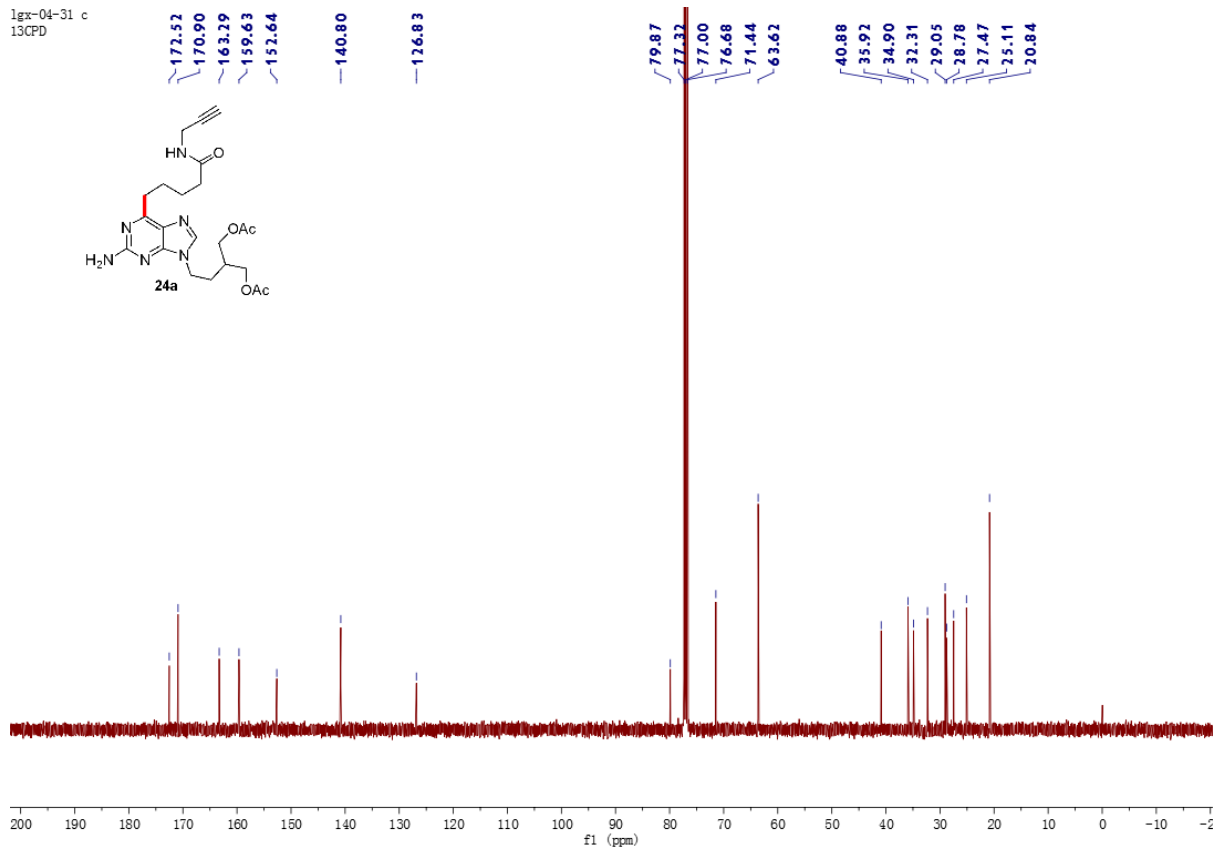

ef1-166 F  
PROTON

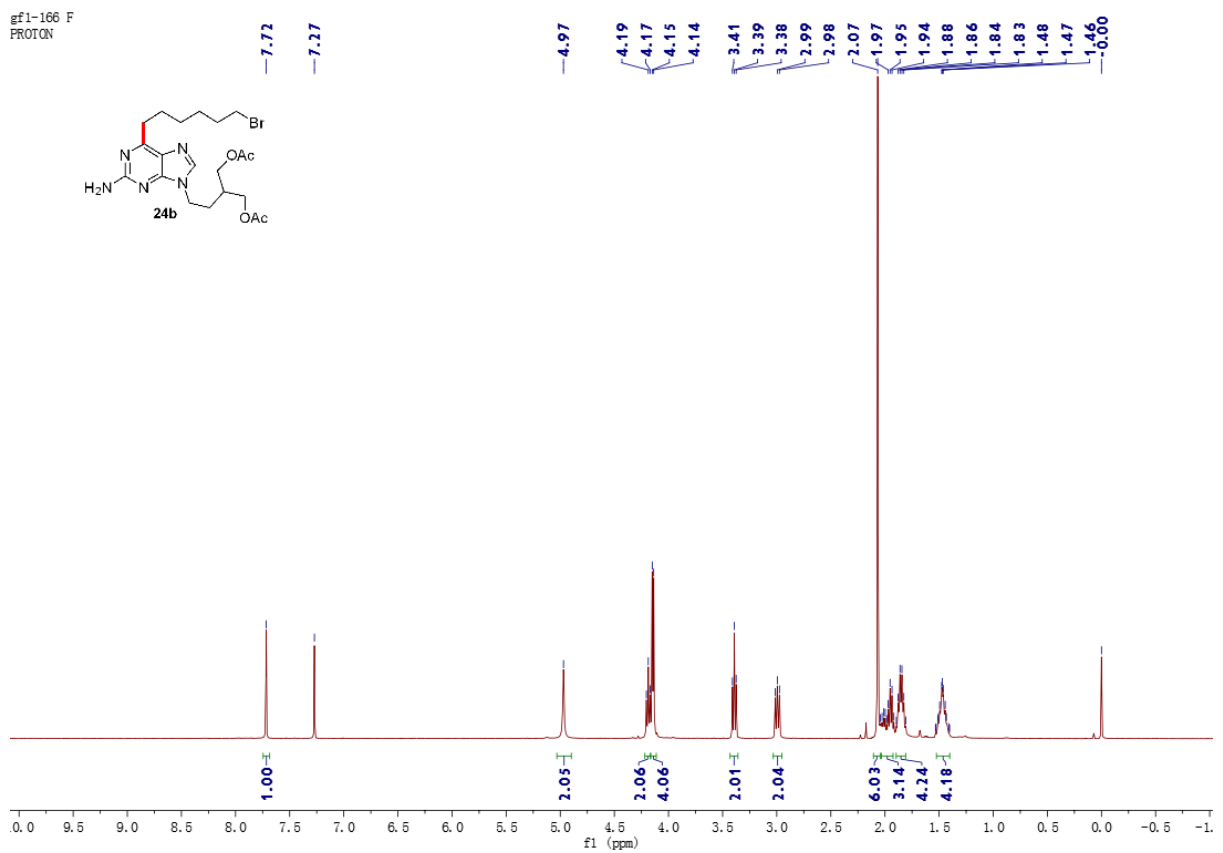

gf1-166 F c  
Cl3CPD

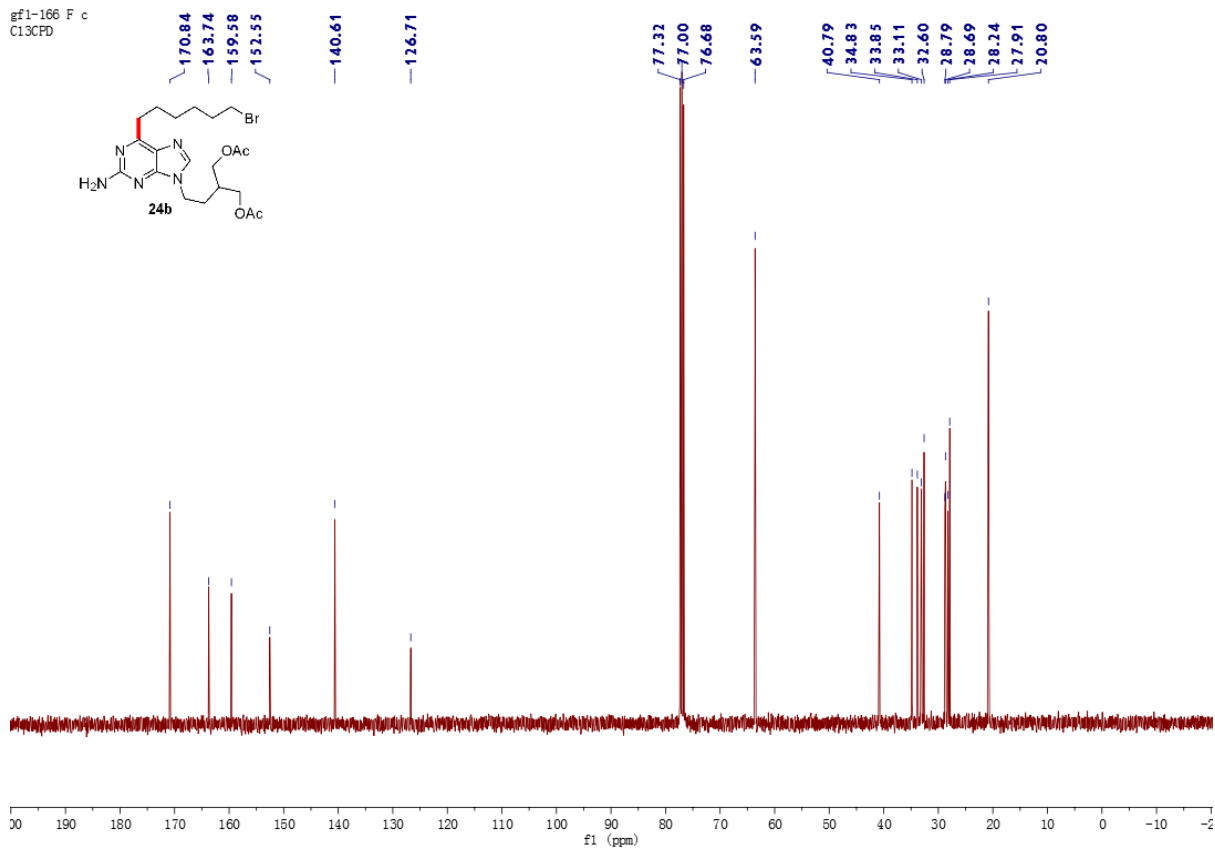

lgx-04-01

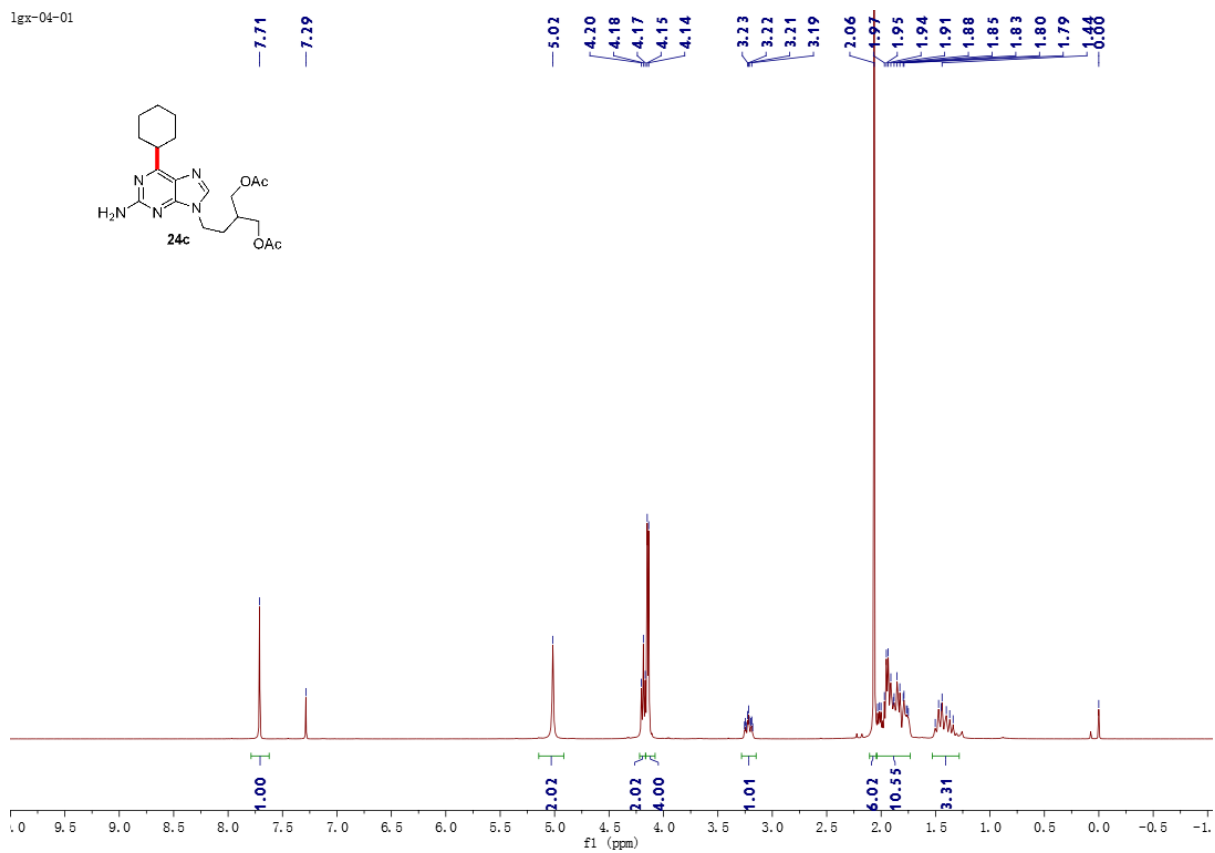

1gx-04-01  
13CPD

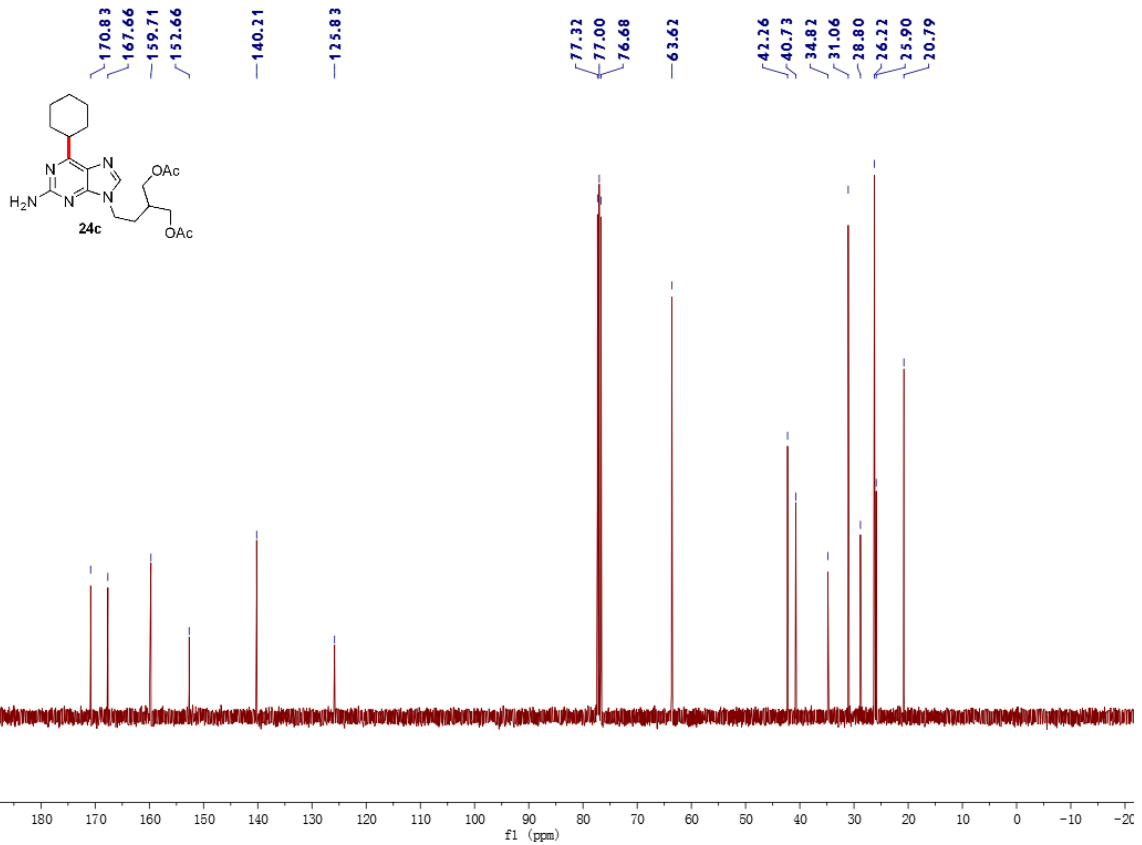

1gx-03-62-H  
PROTON

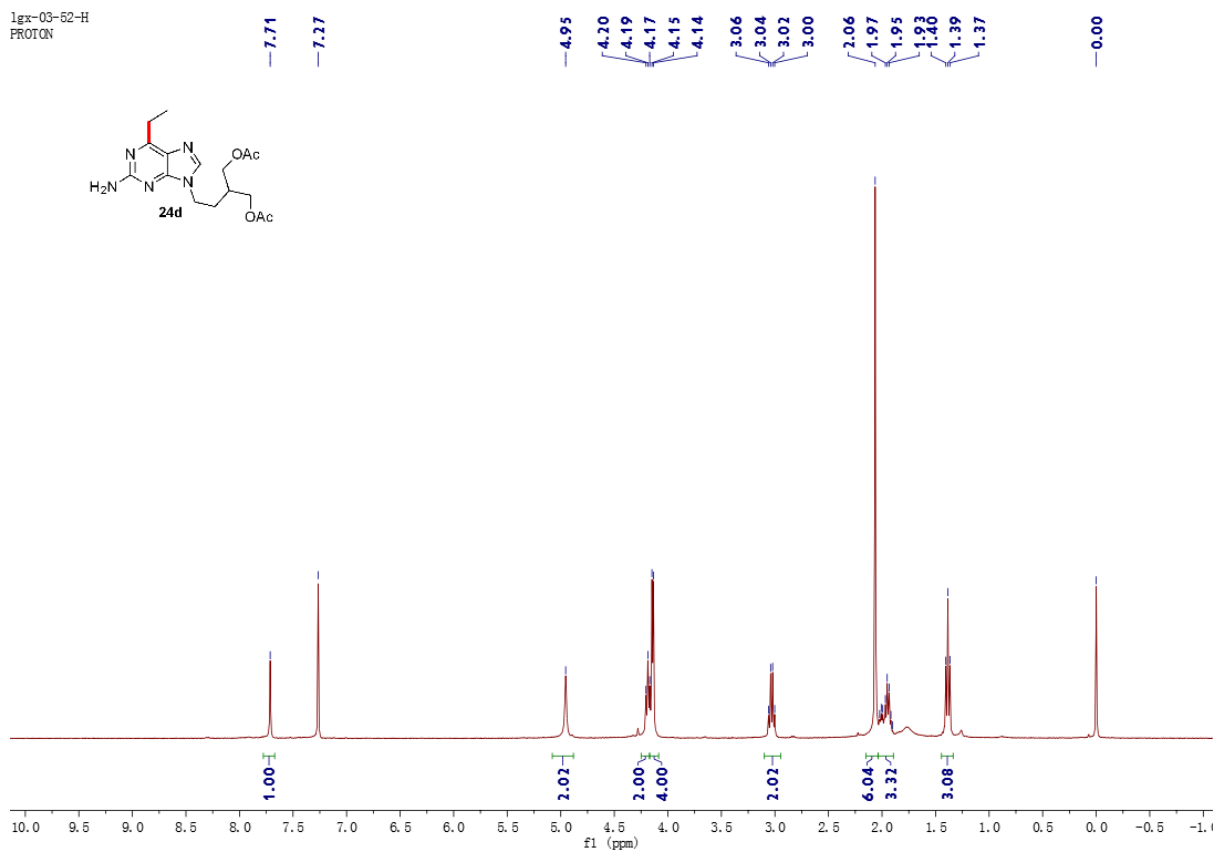

1gx-03-62-C  
Cl3CPD

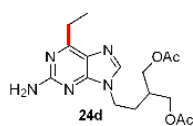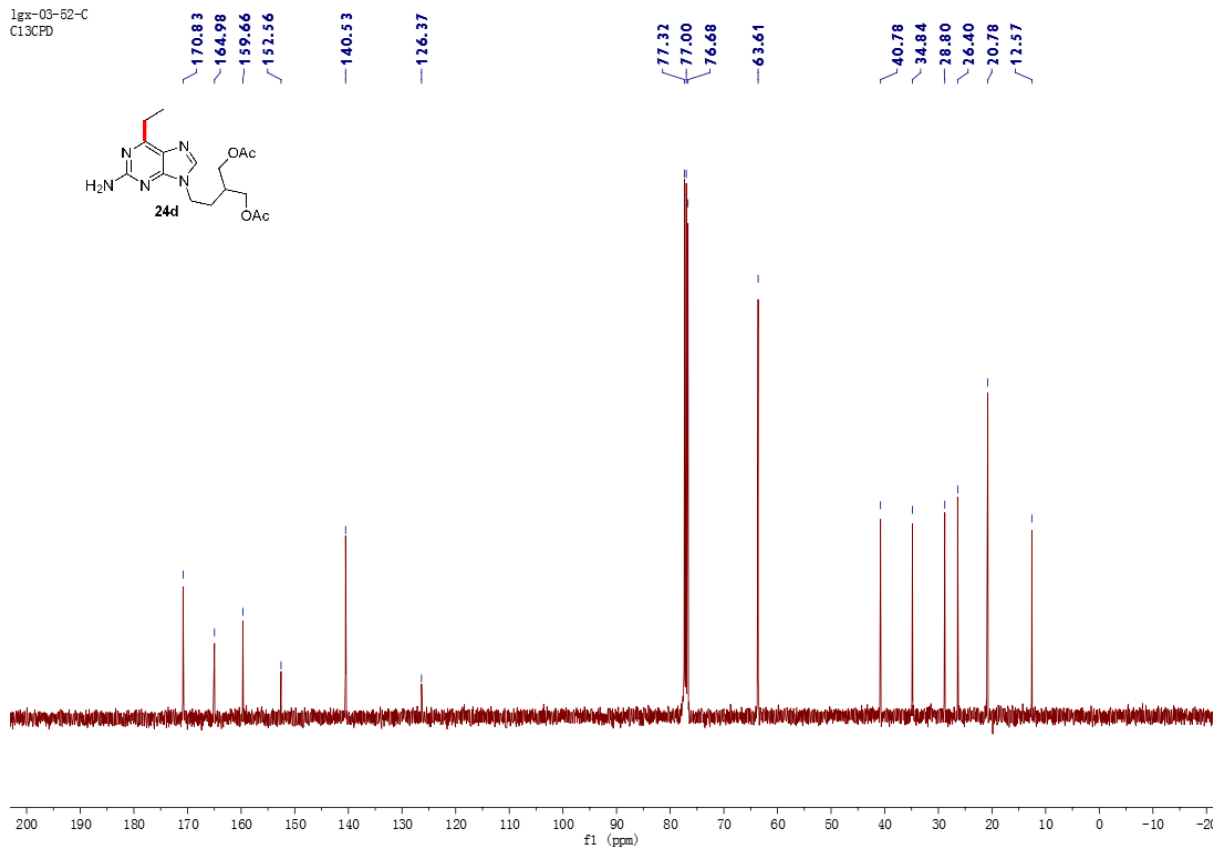

1gx-03-69-3  
test

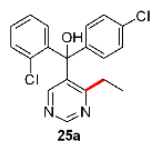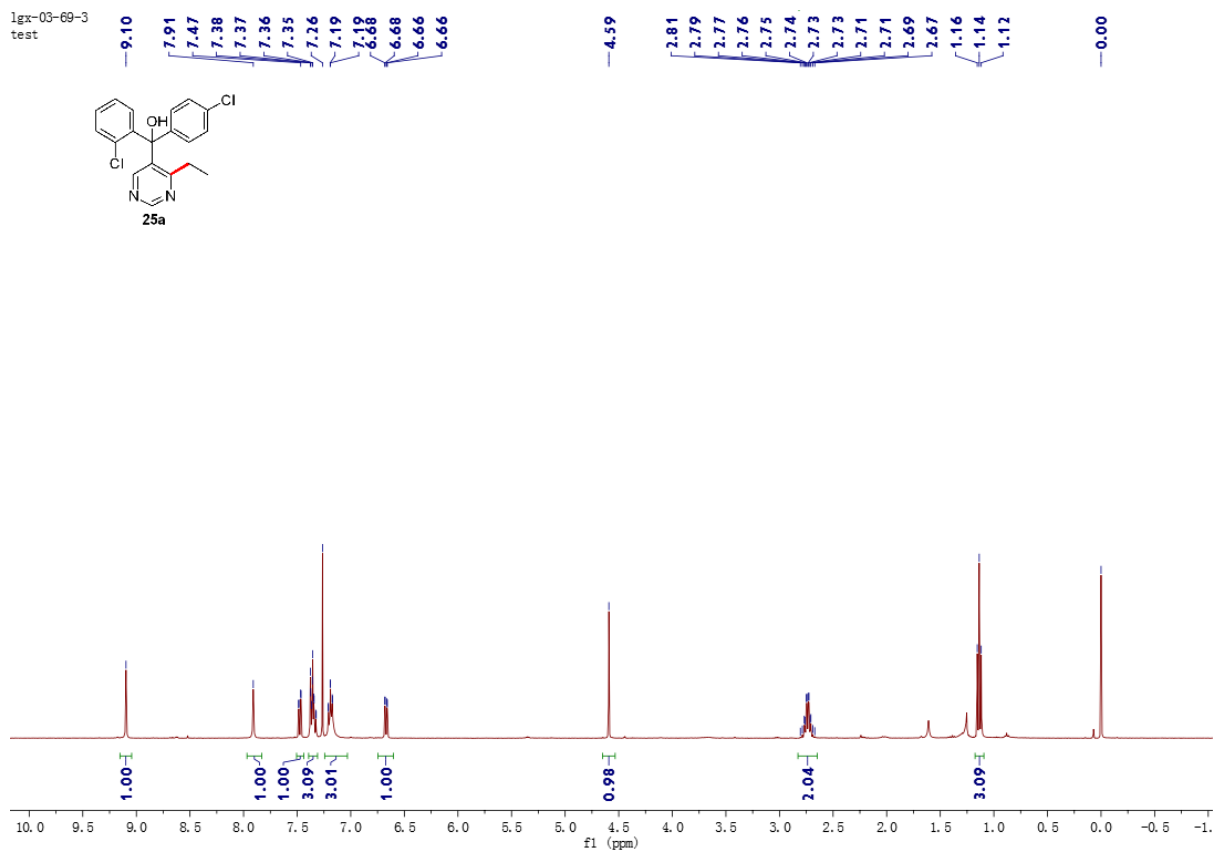

1gx-03-69-3  
test

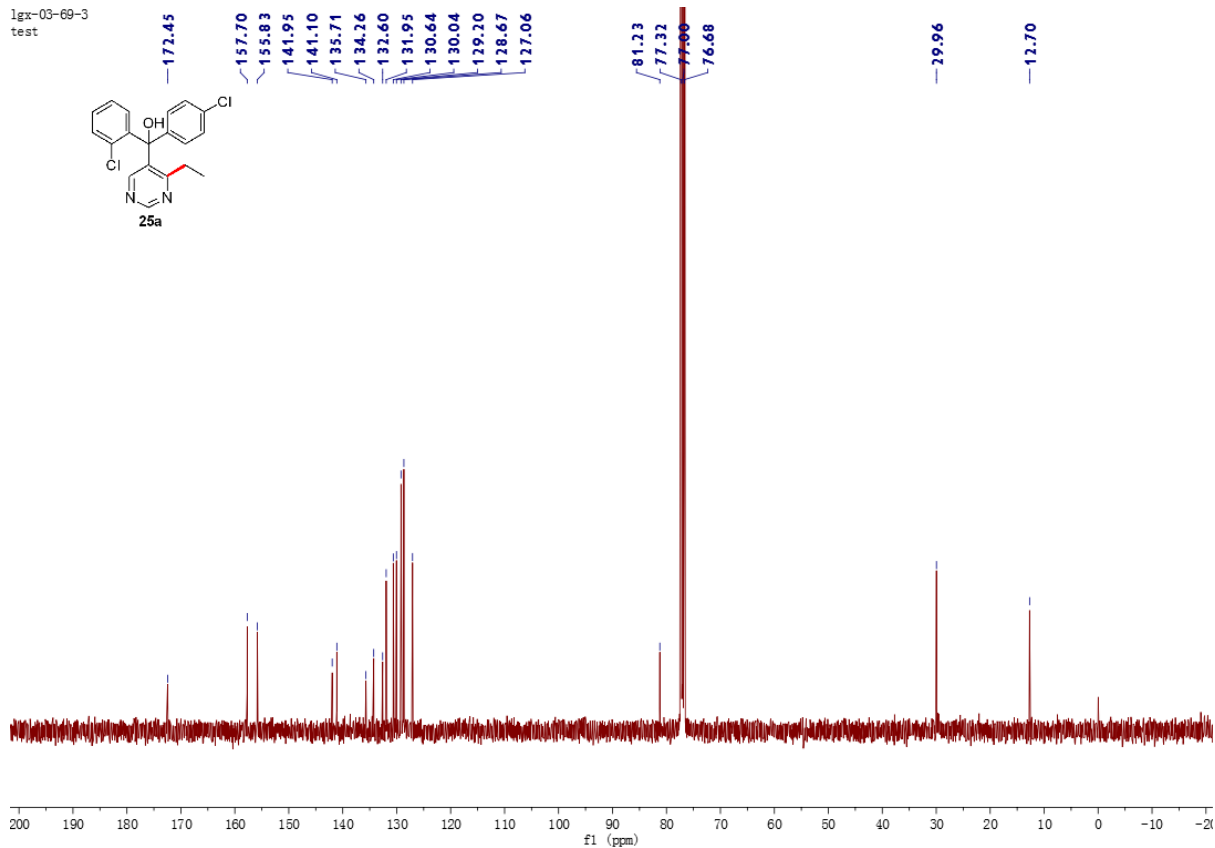

1gx-03-69-2  
PROTON

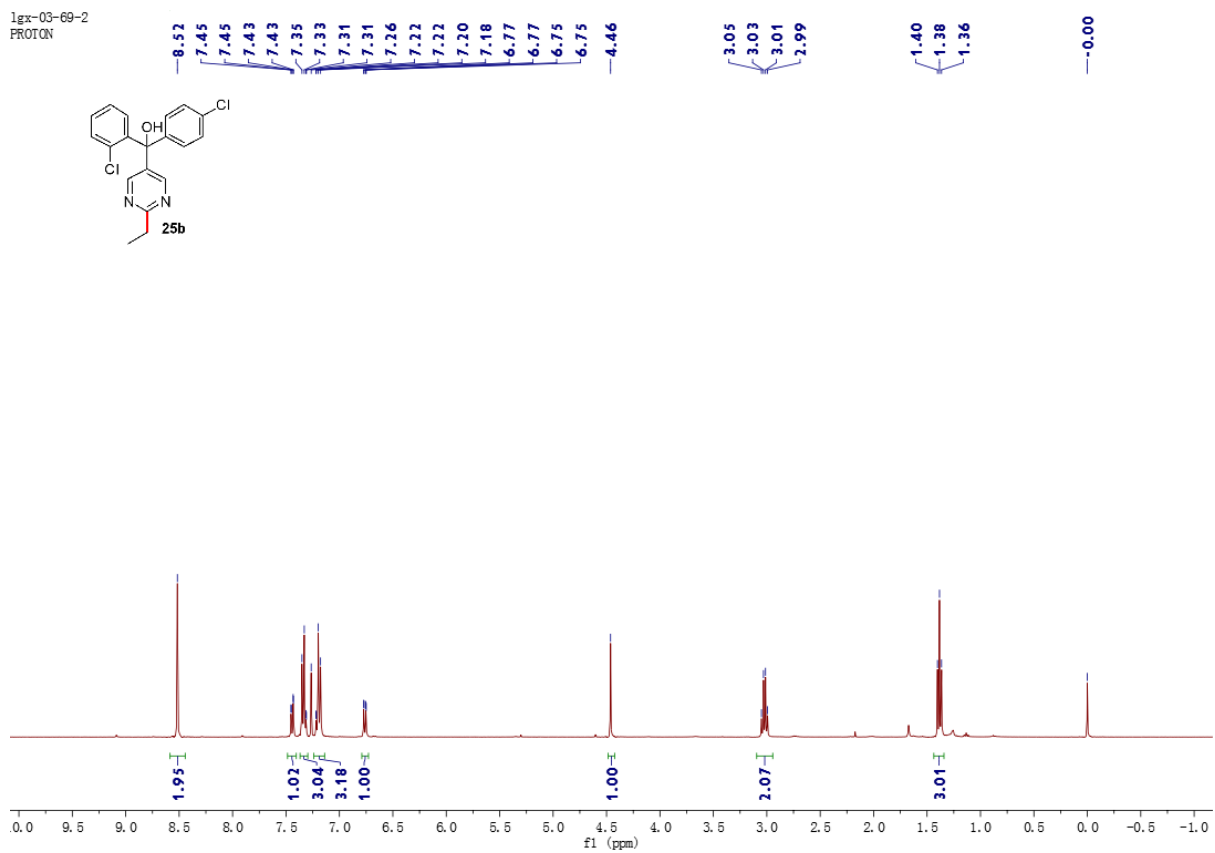

1gx-03-69-2-C  
Cl3CPD

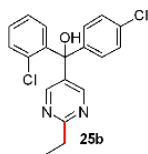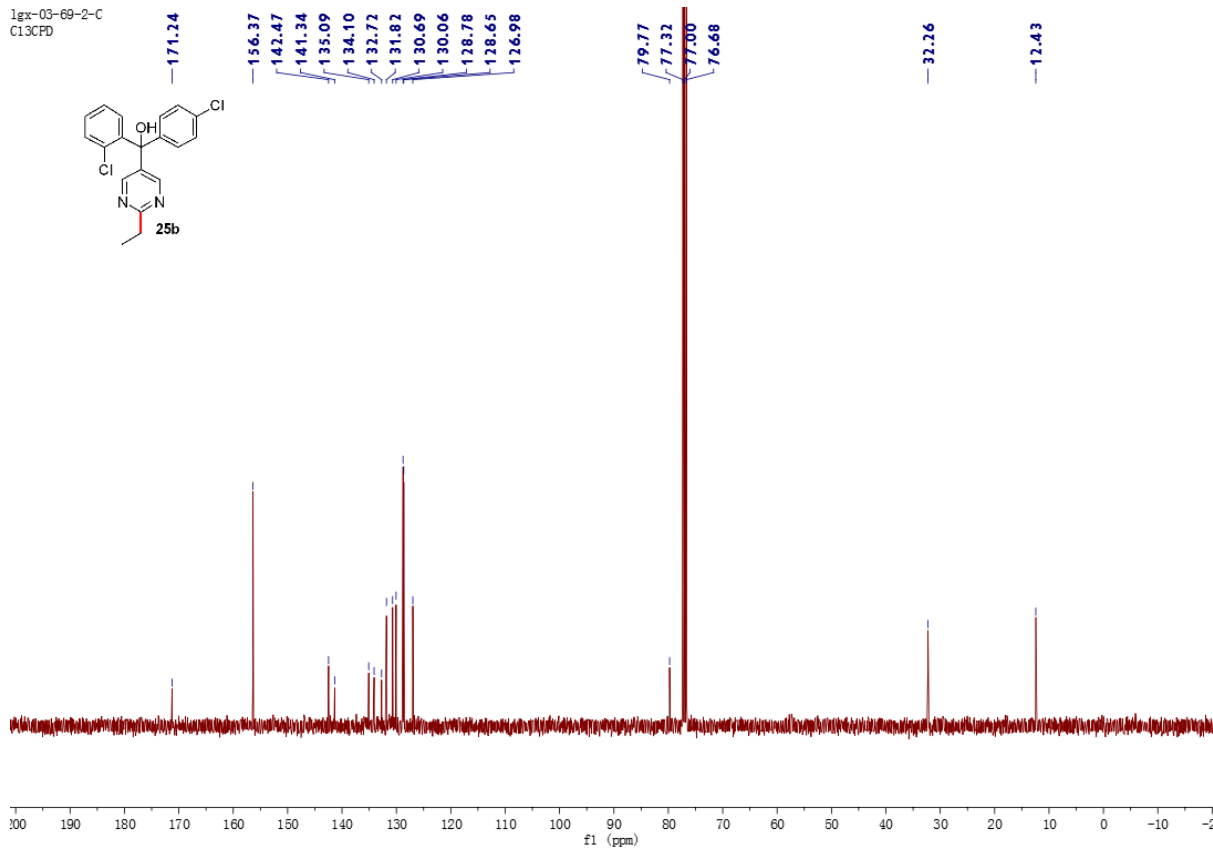

1gx-03-69-1  
PROT

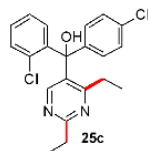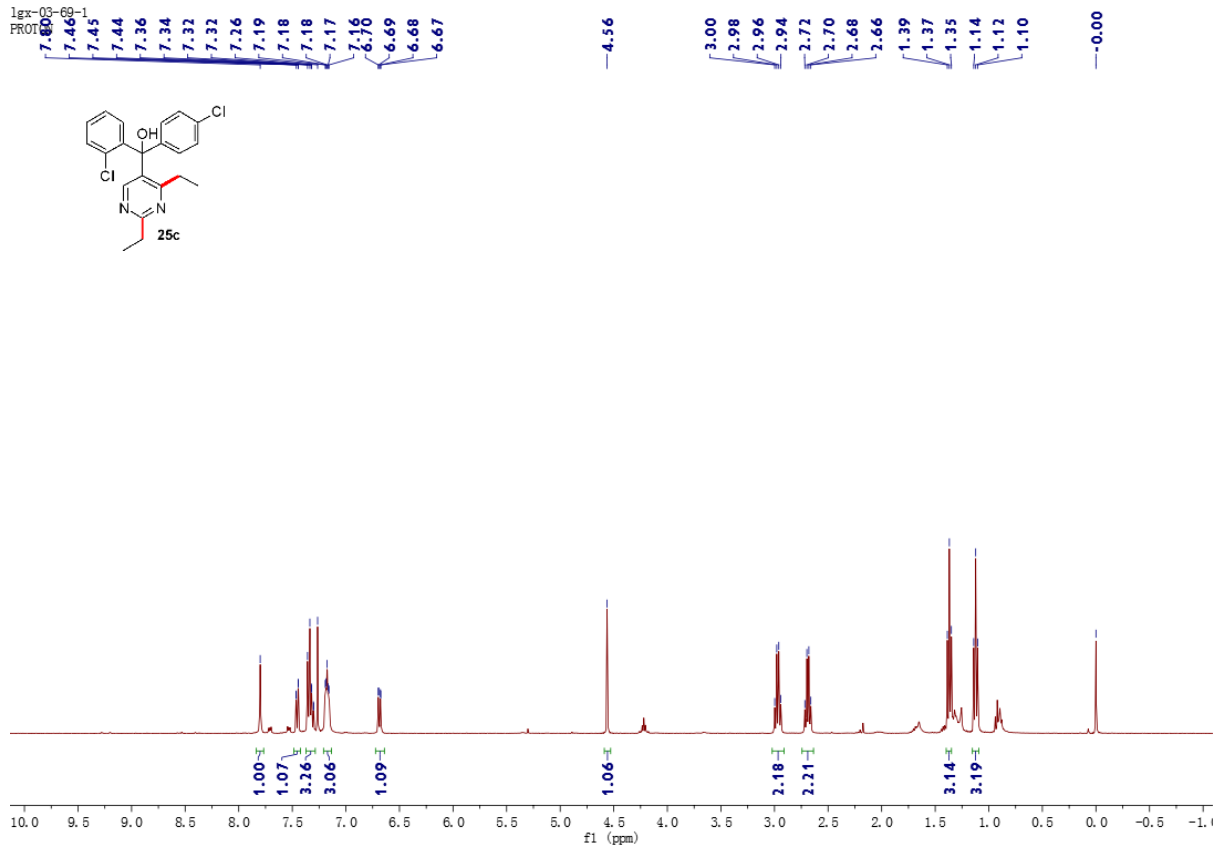

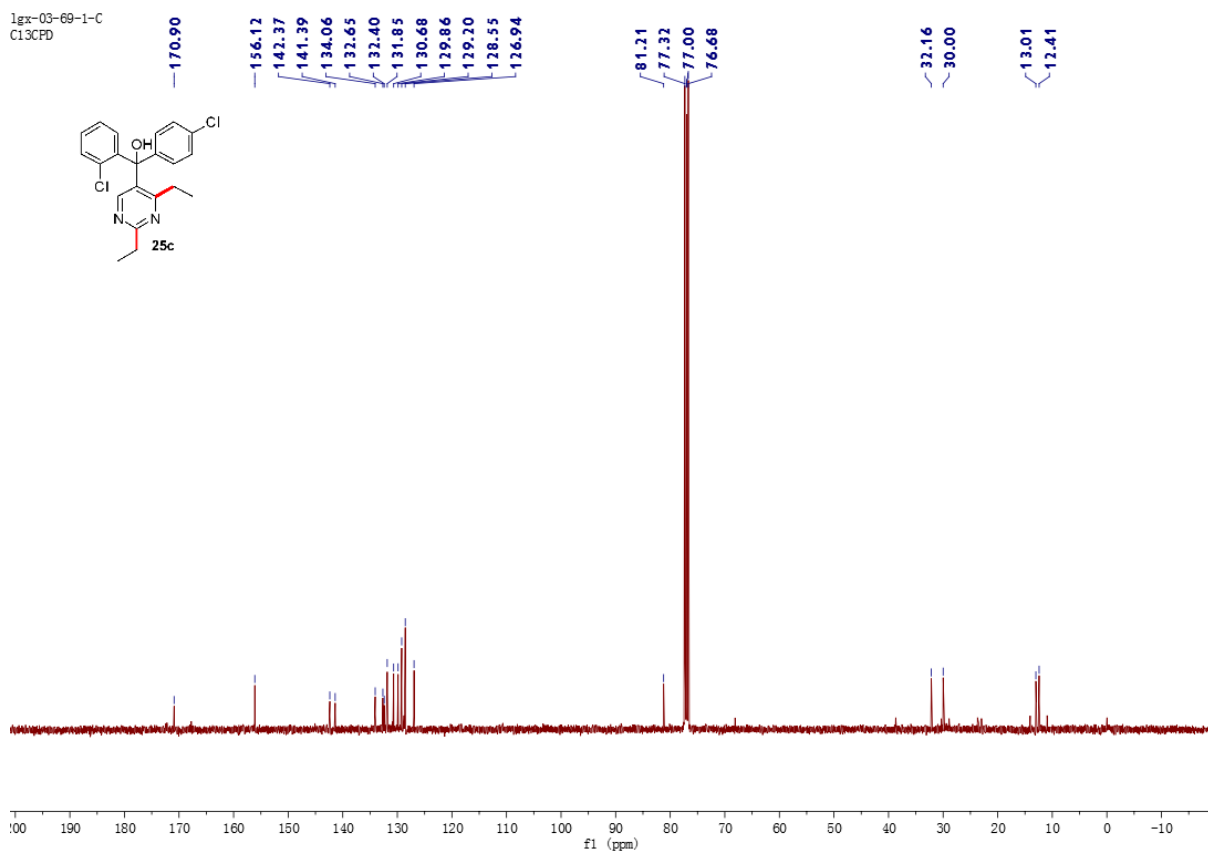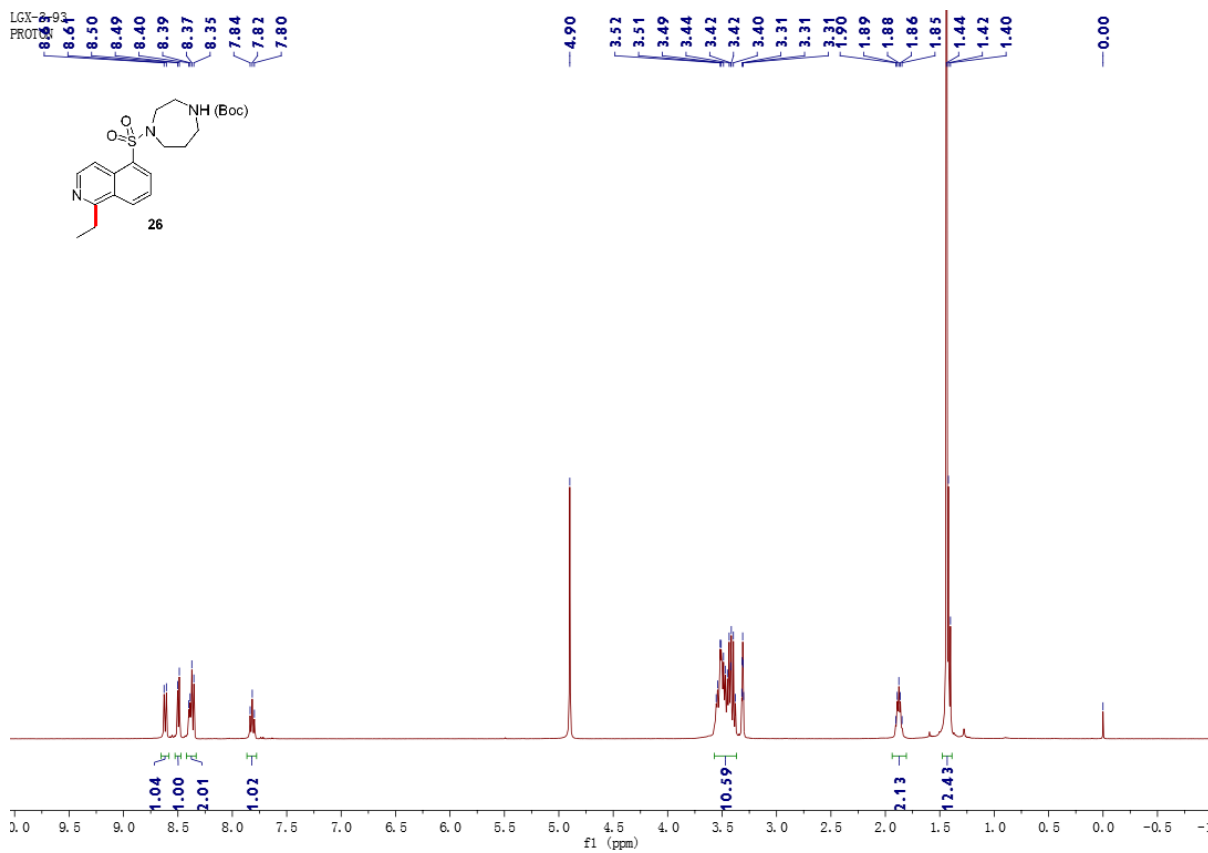



LGX-3-XC  
C13CPD

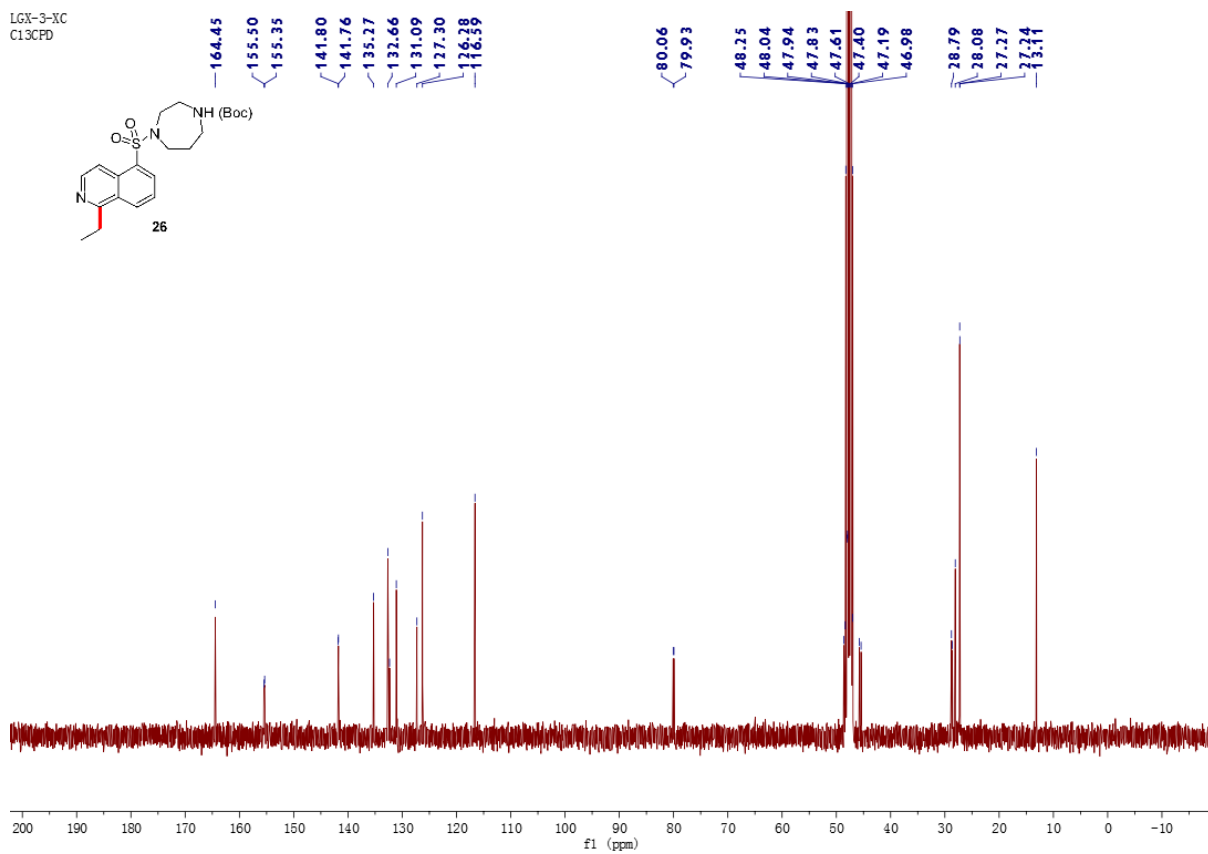

Supplement: SC-007-C6SC02653B-s001.pdf [file SC-007-C6SC02653B-s001.pdf]
